# Supplementary material for: Cytotoxic effects of halogenated tin phosphinoyldithioformate complexes against several cancer cell lines
Source: Royal Society of Chemistry journal article supplement (doi:10.1039/d2dt01127a), 2022-01-01
Supplement: d2dt01127a1.pdf [file d2dt01127a1.pdf]

# Supporting Information

## Cytotoxic Effects of Halogenated Tin Phosphinoyldithioformate Complexes Against Several Cancer Cell Lines

Michaela Balogová<sup>a</sup>, Shubham Sharma<sup>b</sup>, Paulina Cherek<sup>a</sup>, Sigurjón N. Ólafsson<sup>b</sup>, Sigrídur Jónsdóttir<sup>b</sup>, Helga M. Ögmundsdóttir<sup>\*a</sup> and Krishna K. Damodaran<sup>\*b</sup>

<sup>a</sup> Cancer Research Laboratory, Biomedical Center, Faculty of Medicine, University of Iceland, Sturlugata 8, 101, Reykjavik, Iceland. E-mail: [helgaogm@hi.is](mailto:helgaogm@hi.is)

<sup>b</sup> Department of Chemistry, Science Institute, University of Iceland, Dunhagi 3, 107 Reykjavík, Iceland; E-mail: [krishna@hi.is](mailto:krishna@hi.is)

### Table of Contents

|                                                                          |    |
|--------------------------------------------------------------------------|----|
| 1. Infrared spectroscopy.....                                            | 2  |
| 2. NMR Spectroscopy .....                                                | 4  |
| 3. Mass Spectroscopy .....                                               | 15 |
| 4. X-ray crystallography .....                                           | 17 |
| 5. X-ray Powder Diffraction .....                                        | 20 |
| 6. Stability experiments in PBS solutions .....                          | 22 |
| 7. Determination and Comparison of IC <sub>50</sub> values [µg/mL] ..... | 24 |
| 8. Apoptosis.....                                                        | 27 |
| 9. Double strand break (DBS) studies.....                                | 30 |
| 10. Flow cytometry.....                                                  | 33 |

# 1. Infrared spectroscopy

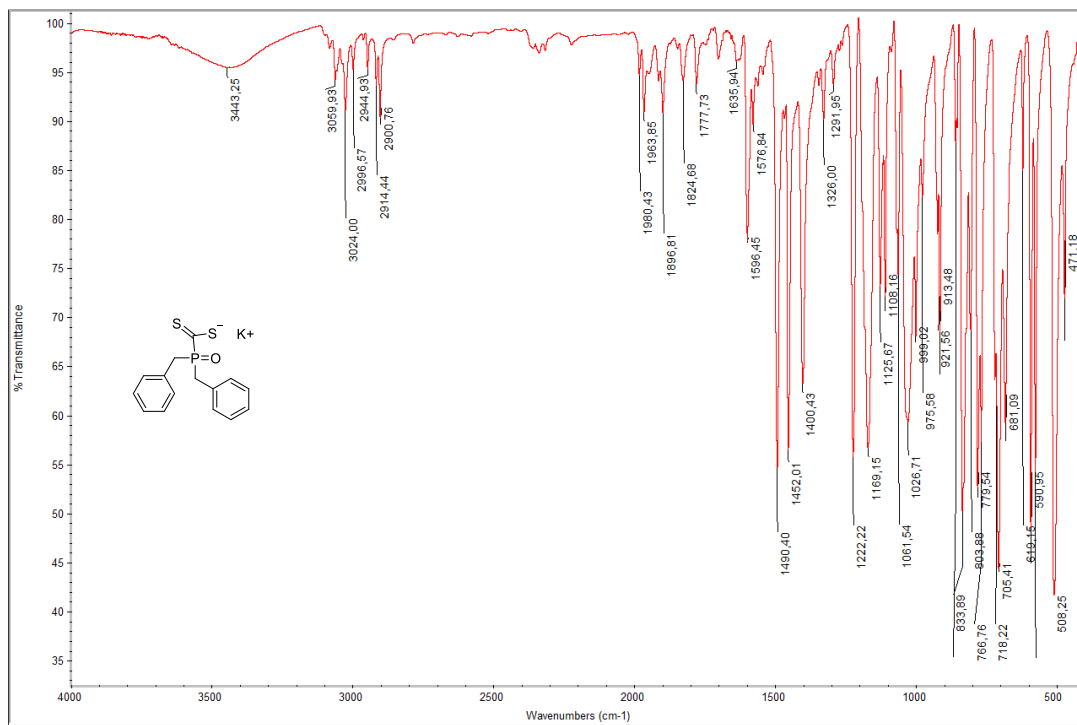

Figure S1. Infrared spectroscopy of K-DBPTF.

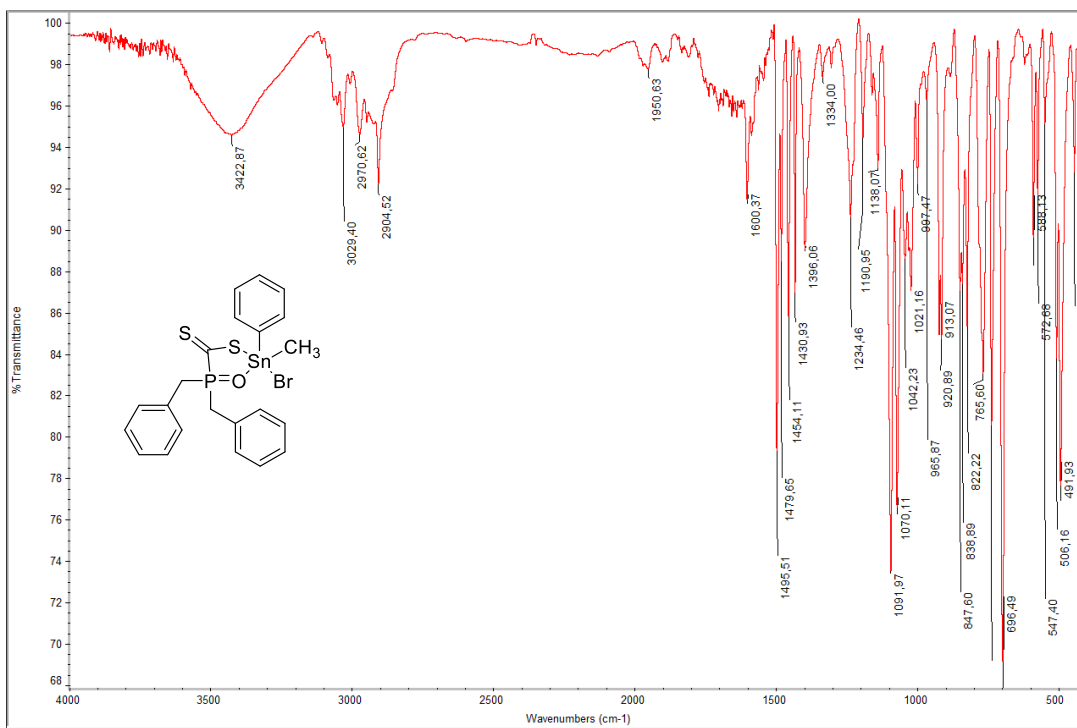

Figure S2. Infrared spectroscopy of Sn-DBPTF-1.

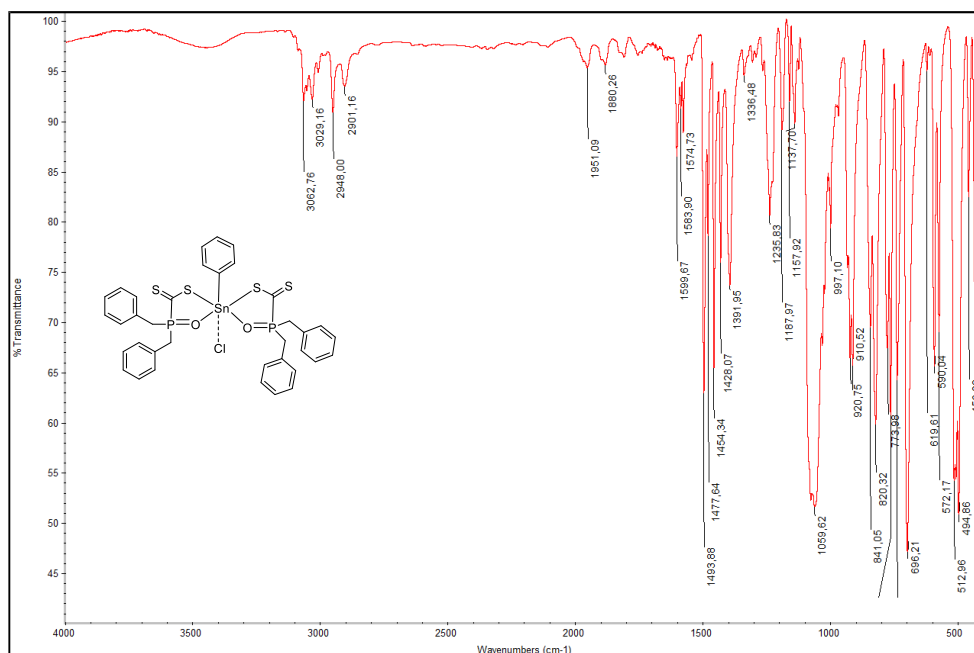

**Figure S3.** Infrared spectroscopy of **Sn-DBPTF-2**.

A general observation in the IR spectra is a large shift of the phosphinoyl group to a lower wavenumber (compared to the free ligand) indicating coordination through the oxygen atom.<sup>1</sup> The  $\bar{\nu}_{\text{asym}}(\text{CS}_2)$  vibrations are expected to shift to higher wavenumber upon coordination of single sulfur to the tin(IV) metal center.<sup>1</sup> IR spectra of **Sn-DBPTF-1** and **Sn-DBPTF-2** (Figure S2-S3) exhibit all the absorptions expected, which was compared with the potassium salt of phosphinoyldithioformate ligand (Figure S1). The ligand shows stretching vibration peak of the phosphinoyl group and asymmetric vibration for  $\text{CS}_2$  at 1169.15 and 1026.71  $\text{cm}^{-1}$ , respectively, and is well known to bind to Sn metals in a monodentate fashion or chelate mode via bidentate (S,O) or (S,S) fashion. The positive coordination shift of the stretching vibration of the phosphinoyl group indicate bidentate (S,O) coordination, which was calculated based on reported values ( $\Delta\bar{\nu}(\text{P}=\text{O}) = \bar{\nu}(\text{free ligand}) - \bar{\nu}(\text{complex})$ ). On the other hand, the negative coordination shifts of  $\bar{\nu}(\text{P}=\text{O})$  to higher wavenumbers indicate monodentate or (S,S) bidentate coordination. In **Sn-DBPTF-1** and **Sn-DBPTF-2**,  $\Delta\bar{\nu}$  is found: 77.18 and 109.53  $\text{cm}^{-1}$ , respectively indicating bidentate (S,O) coordination. The appearance of the  $\bar{\nu}(\text{C}=\text{S})$  vibration at 1070.11 and 1059.62  $\text{cm}^{-1}$  in **Sn-DBPTF-1** and **Sn-DBPTF-2**, respectively, shifted to higher wavenumbers compared with  $\bar{\nu}_{\text{asym}}(\text{CS}_2)$  of the non-coordinated ligand (1026.71  $\text{cm}^{-1}$ ), indicates single S-coordination as well. The infrared spectra reveal that all the compounds have bidentate S,O coordination to the Sn(IV) center in the solid state.

**Table S1.** Comparison of IR Peaks

| Compound          | $\bar{\nu}(\text{P}=\text{O})$ in $\text{cm}^{-1}$ | $\bar{\nu}_{\text{asym}}(\text{CS}_2)$ in $\text{cm}^{-1}$ |
|-------------------|----------------------------------------------------|------------------------------------------------------------|
| K-DBPTF           | 1169.15                                            | 1026.71                                                    |
| <b>Sn-DBPTF-1</b> | 1091.97                                            | 1070.11                                                    |
| <b>Sn-DBPTF-2</b> | 1059.62                                            | 1059.62                                                    |

## 2. NMR Spectroscopy

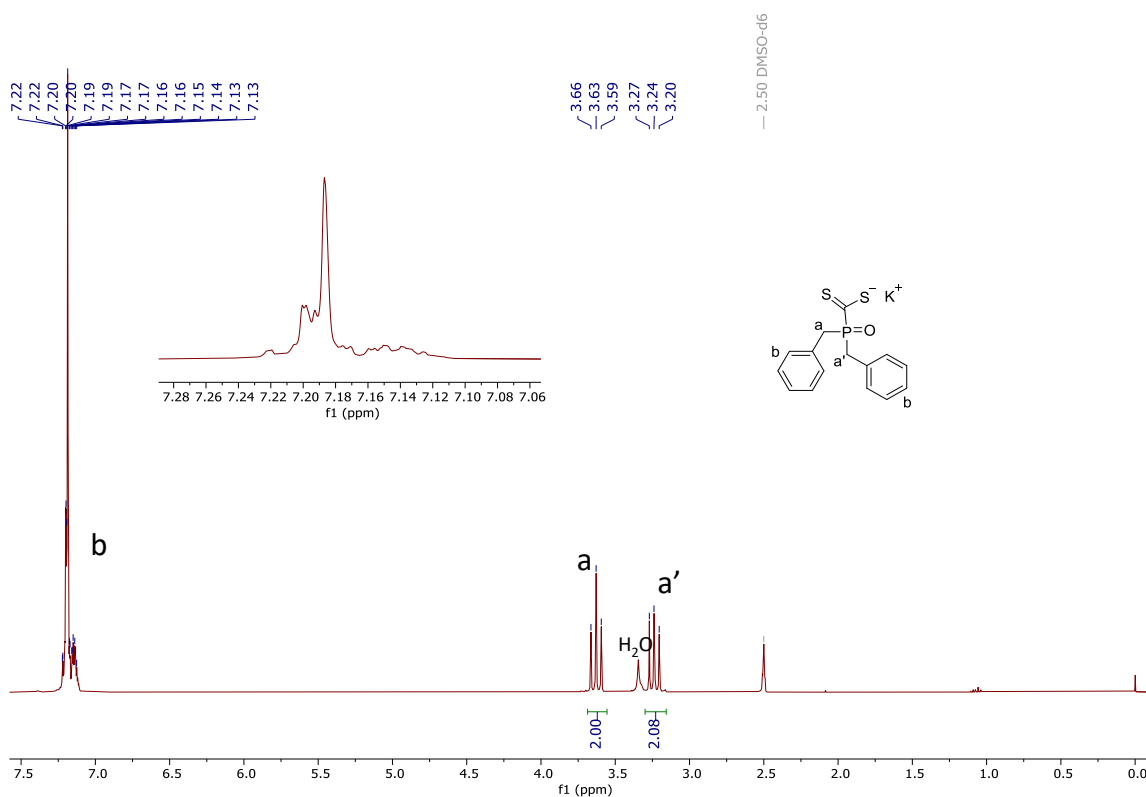

Figure S4.  $^1\text{H}$  NMR spectrum of K-DBPTF in  $\text{DMSO-}d_6$ .

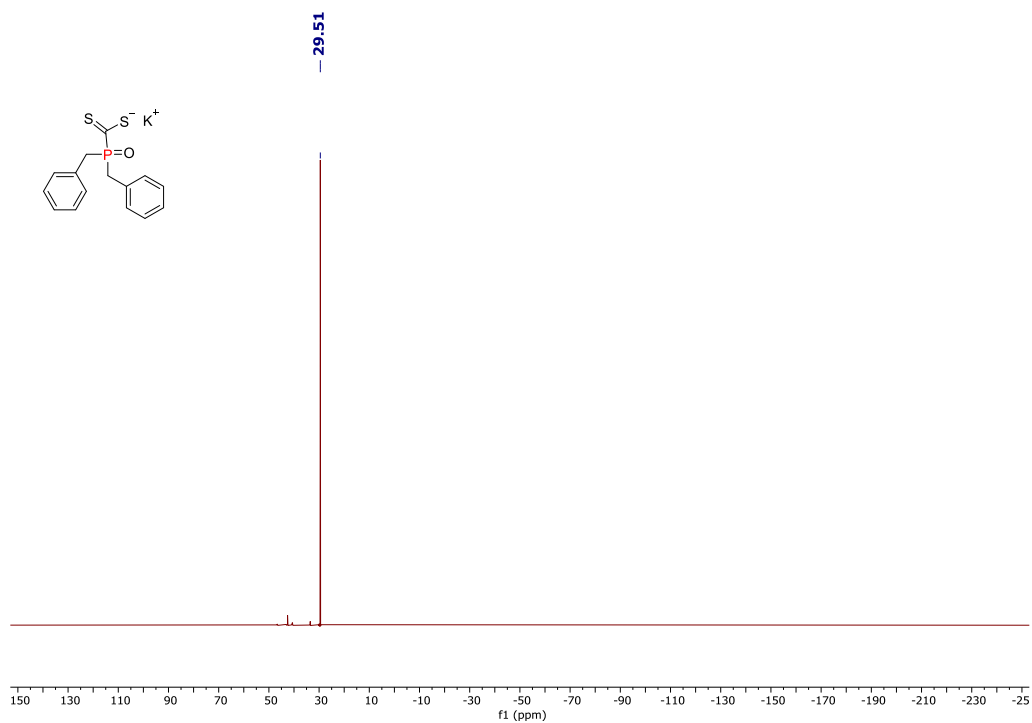

Figure S5.  $^{31}\text{P}\{^1\text{H}\}$ -NMR spectrum of K-DBPTF in  $\text{DMSO-}d_6$ .



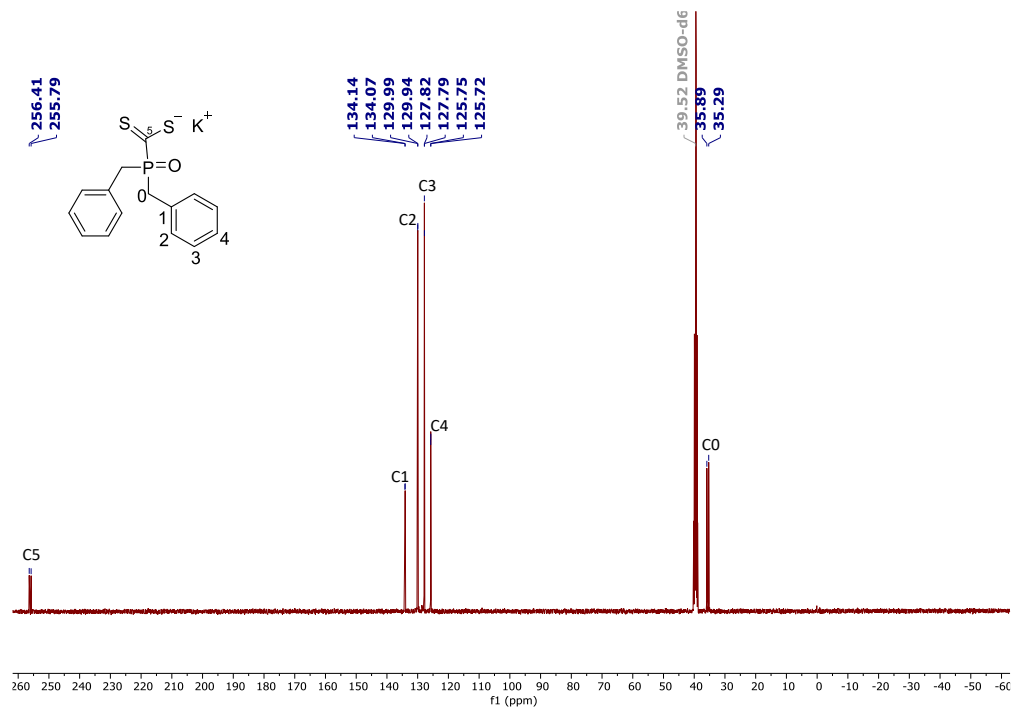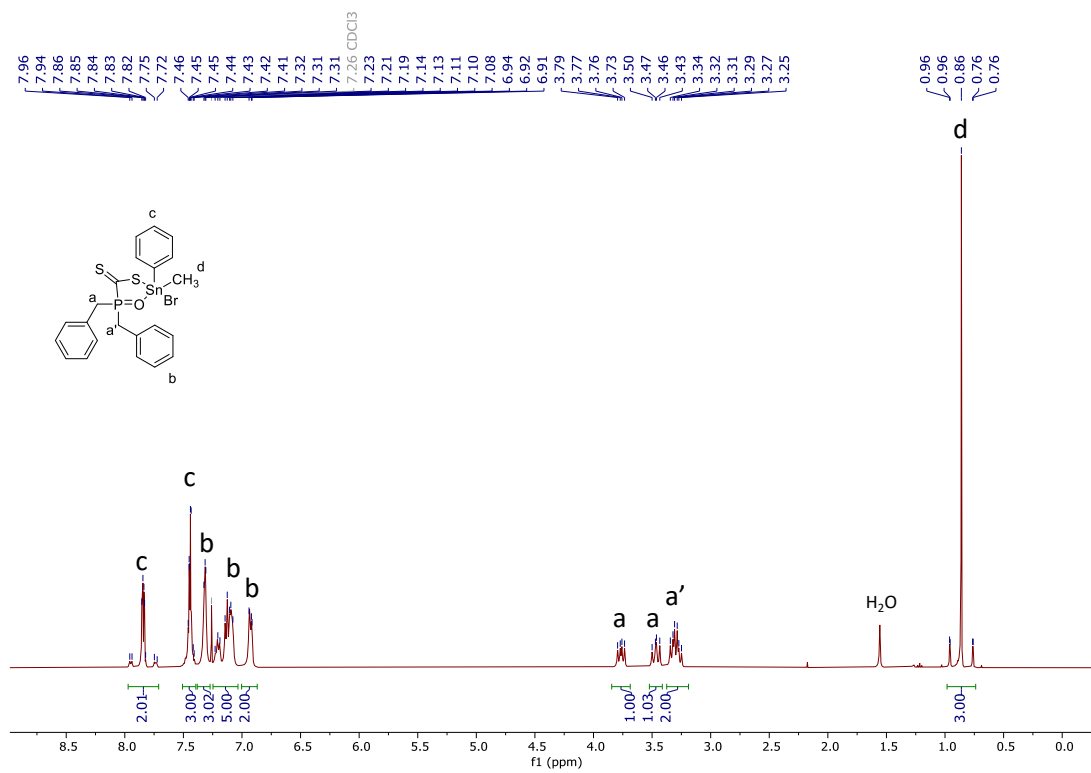

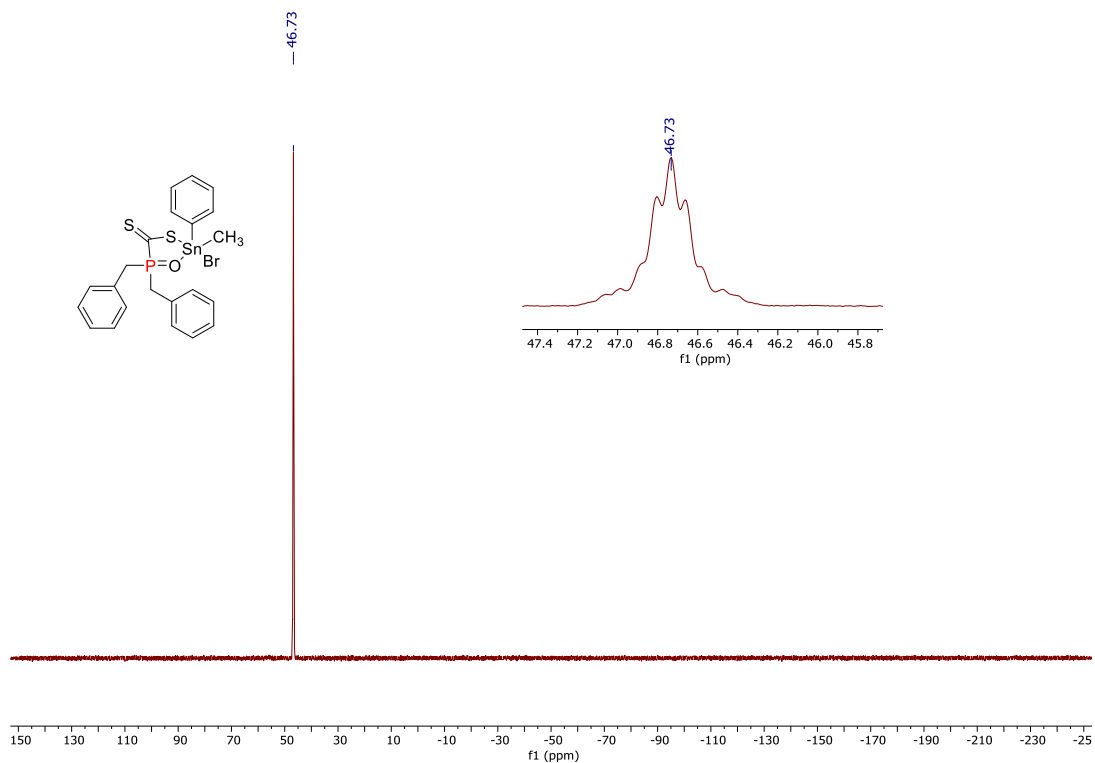

Figure S8.  $^{31}\text{P}\{^1\text{H}\}$ -NMR spectrum of Sn-DBPTF-1 in  $\text{CDCl}_3$ .

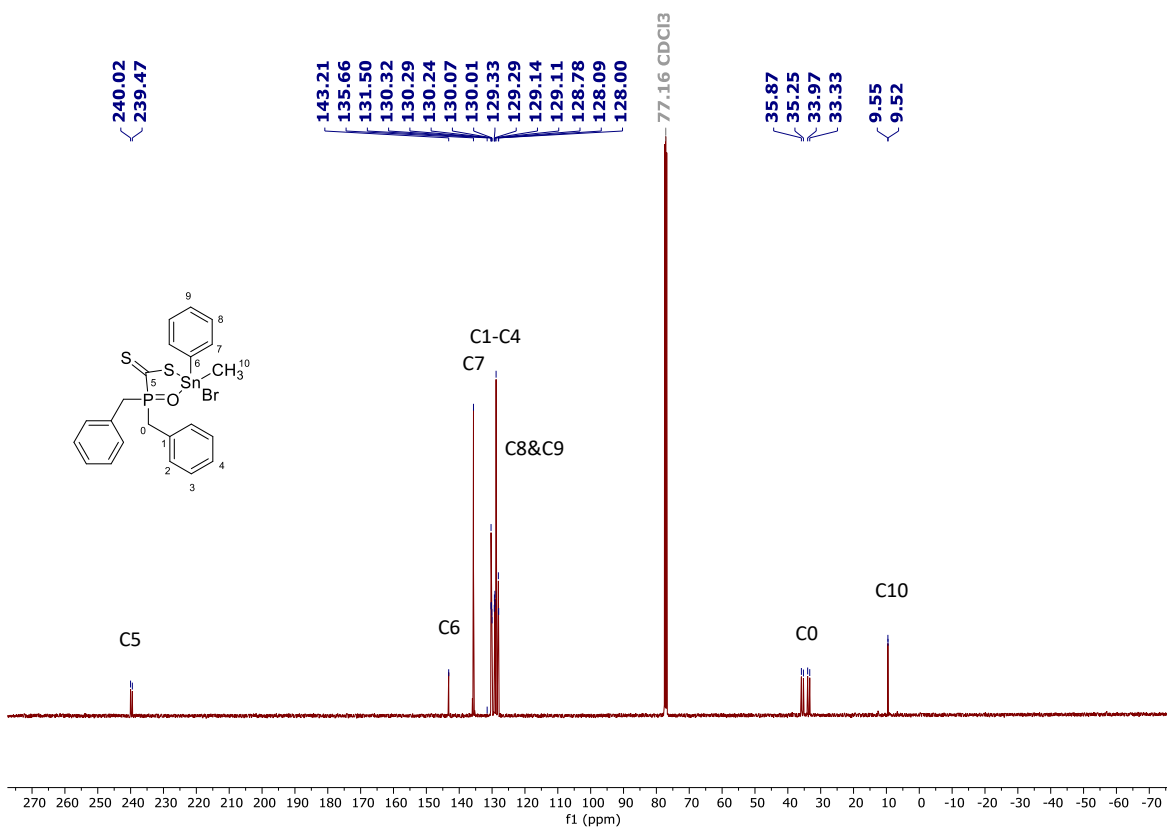

Figure S9.  $^{13}\text{C}\{^1\text{H}\}$ -NMR spectrum of Sn-DBPTF-1 in  $\text{CDCl}_3$ .

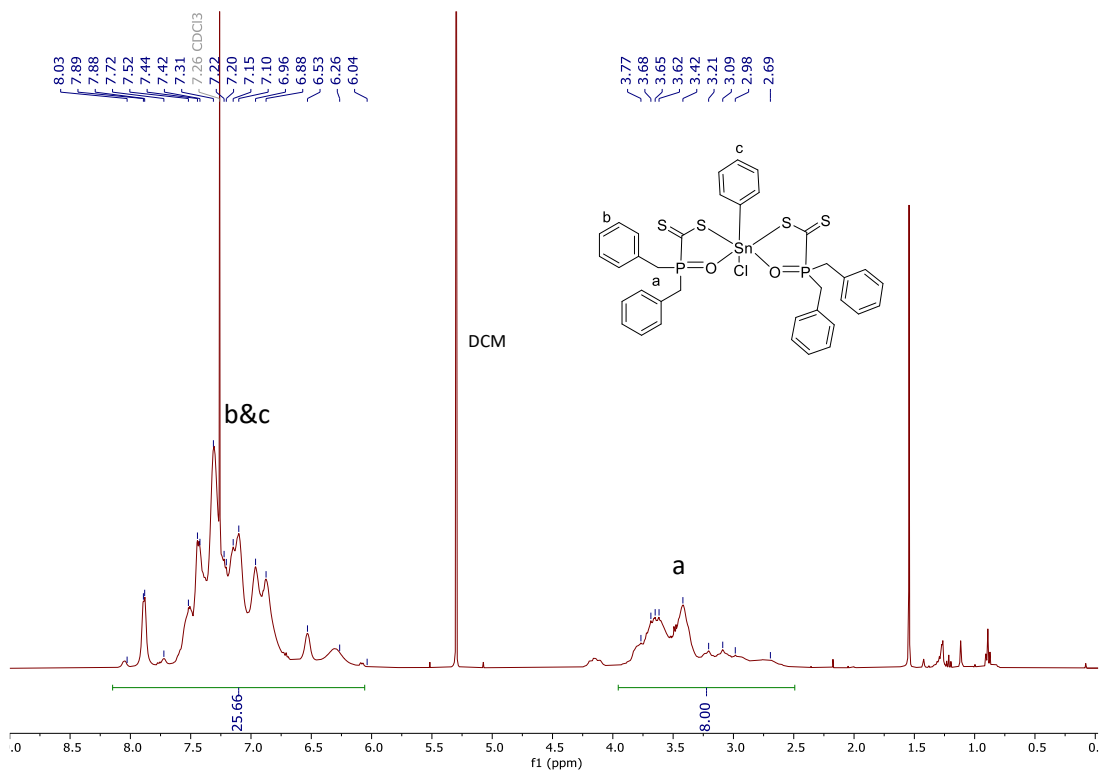

Figure S10.  $^1\text{H}$  NMR spectrum of Sn-DBPTF-2 in  $\text{CDCl}_3$  at room temperature.

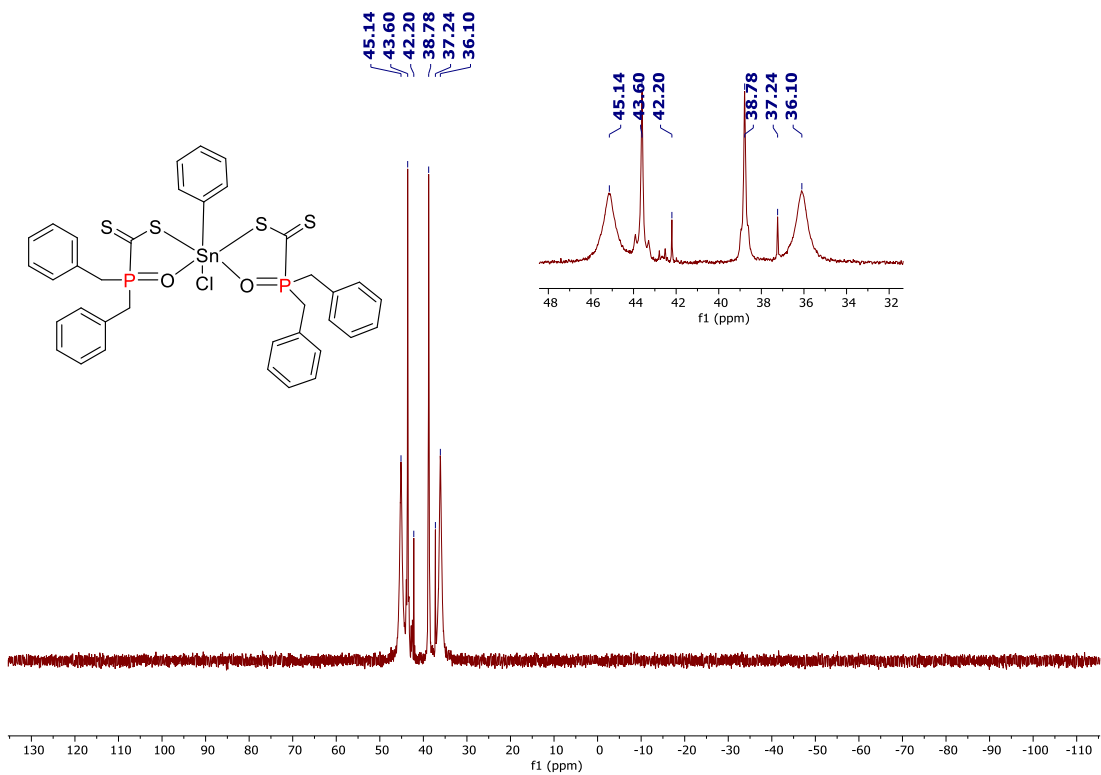

Figure S11.  $^{31}\text{P}\{^1\text{H}\}$ -NMR spectrum of Sn-DBPTF-2 in  $\text{CDCl}_3$  at room temperature.

Since the peaks of **Sn-DBPTF-2** in  $\text{CDCl}_3$  were broad due to the existence of several isomers at room temperature, we performed the NMR experiments at a lower temperature.

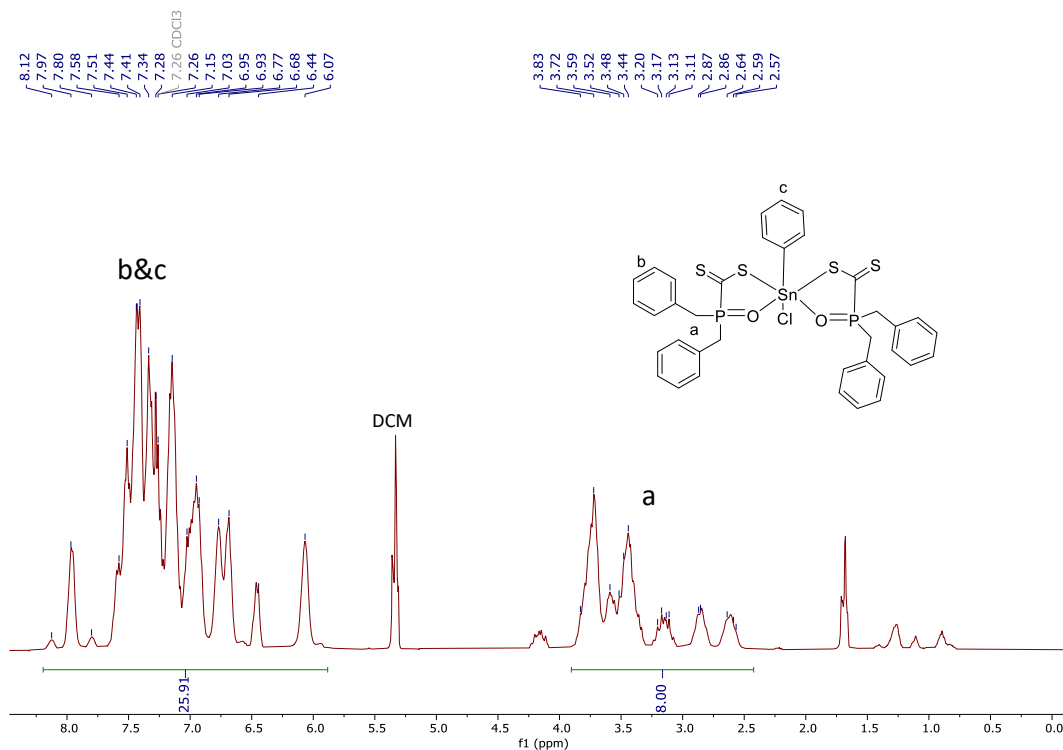

**Figure S12.**  $^1\text{H}$  NMR spectrum of **Sn-DBPTF-2** in  $\text{CDCl}_3$  at 259 K.

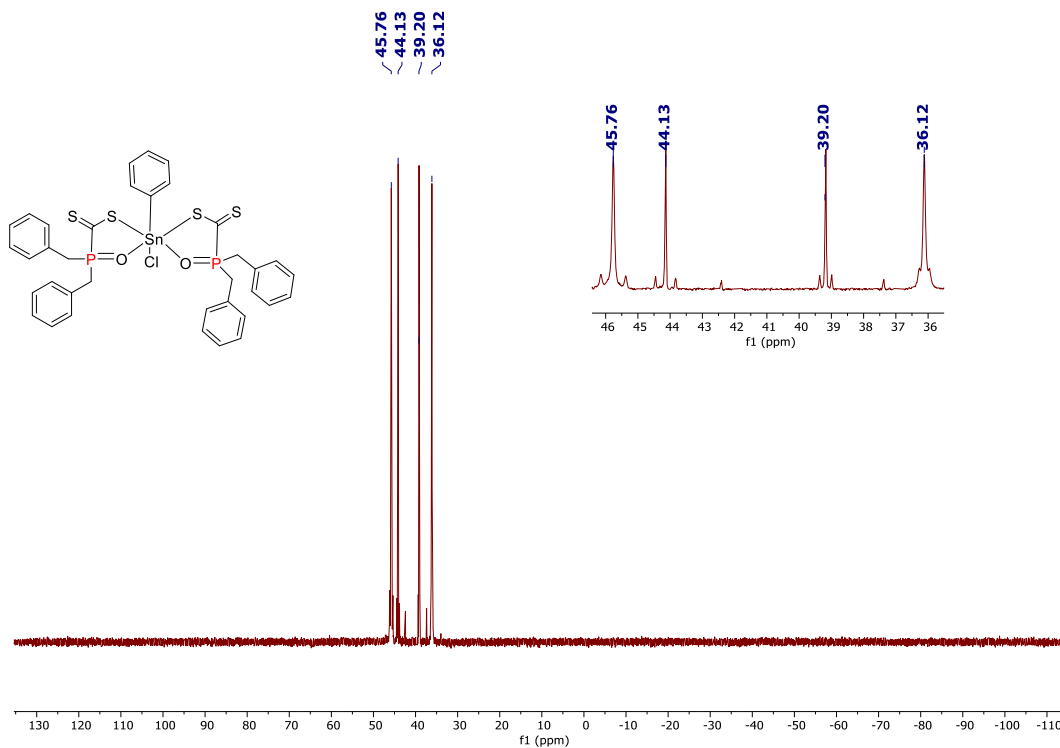

**Figure S13.**  $^{31}\text{P}\{^1\text{H}\}$ -NMR spectrum of **Sn-DBPTF-2** in  $\text{CDCl}_3$  at 259 K.

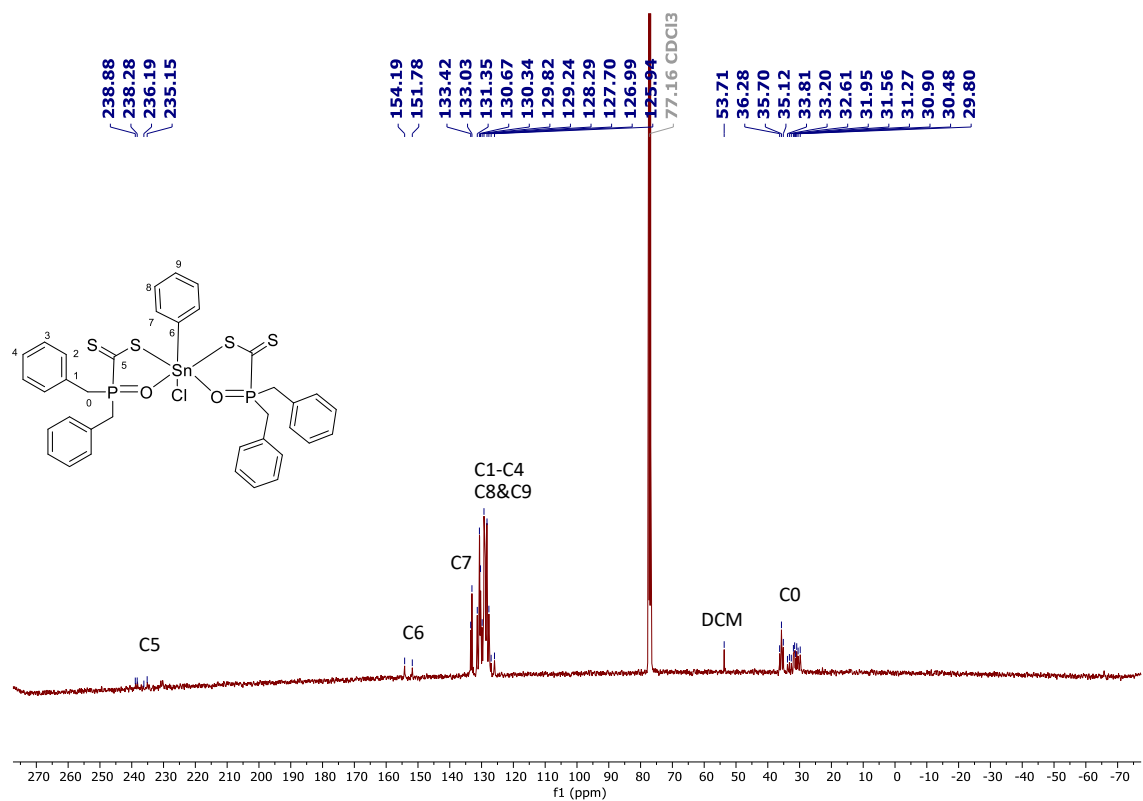

Figure S14.  $^{13}\text{C}\{^1\text{H}\}$ -NMR spectrum of Sn-DBPTF-2 in  $\text{CDCl}_3$  at 259 K.

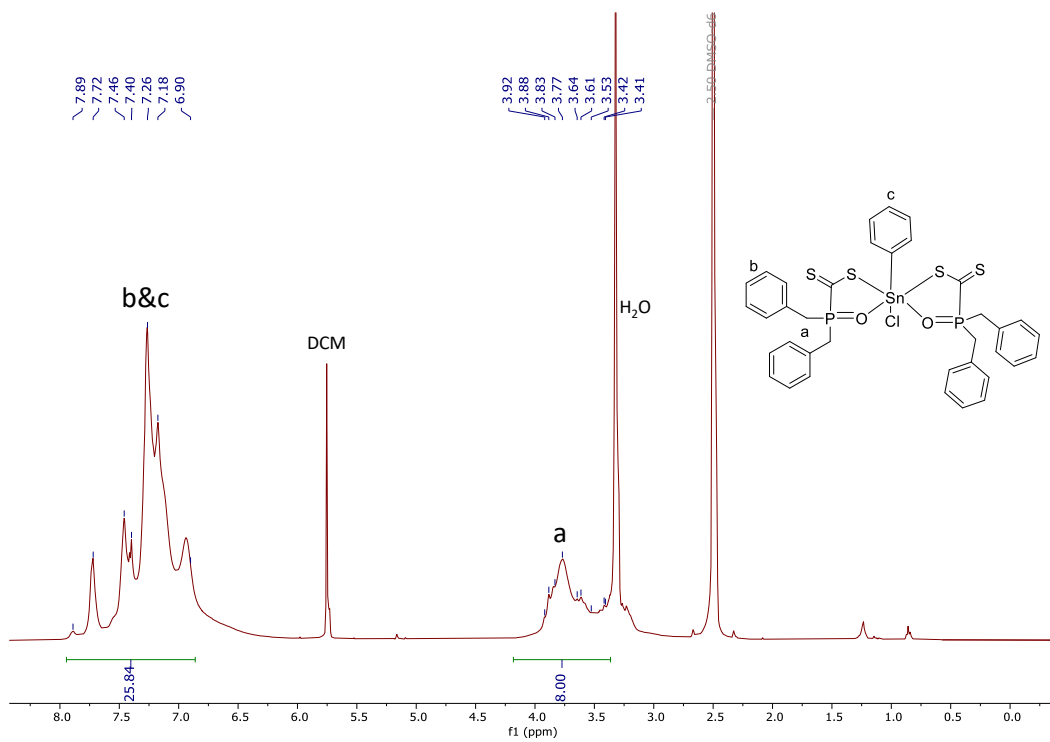

Figure S15.  $^1\text{H}$  NMR spectrum of Sn-DBPTF-2 in  $\text{DMSO}-d_6$ .

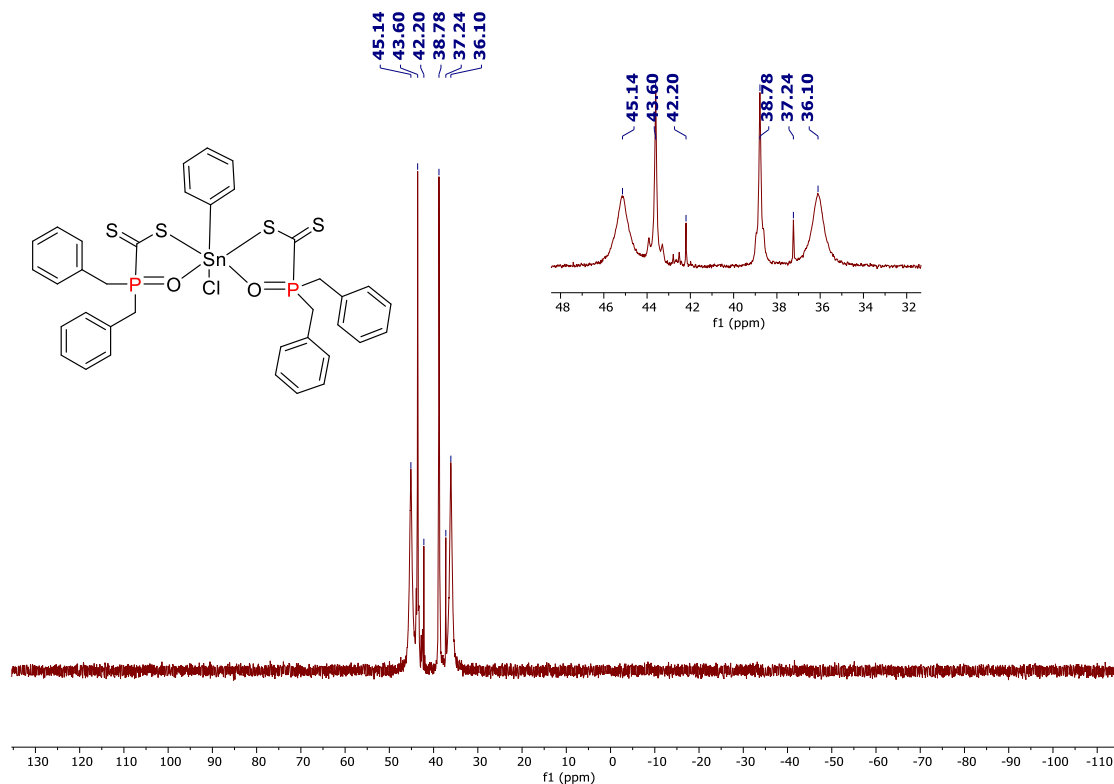

Figure S16.  $^{31}\text{P}\{^1\text{H}\}$ -NMR spectrum of Sn-DBPTF-2 in  $\text{DMSO-}d_6$ .

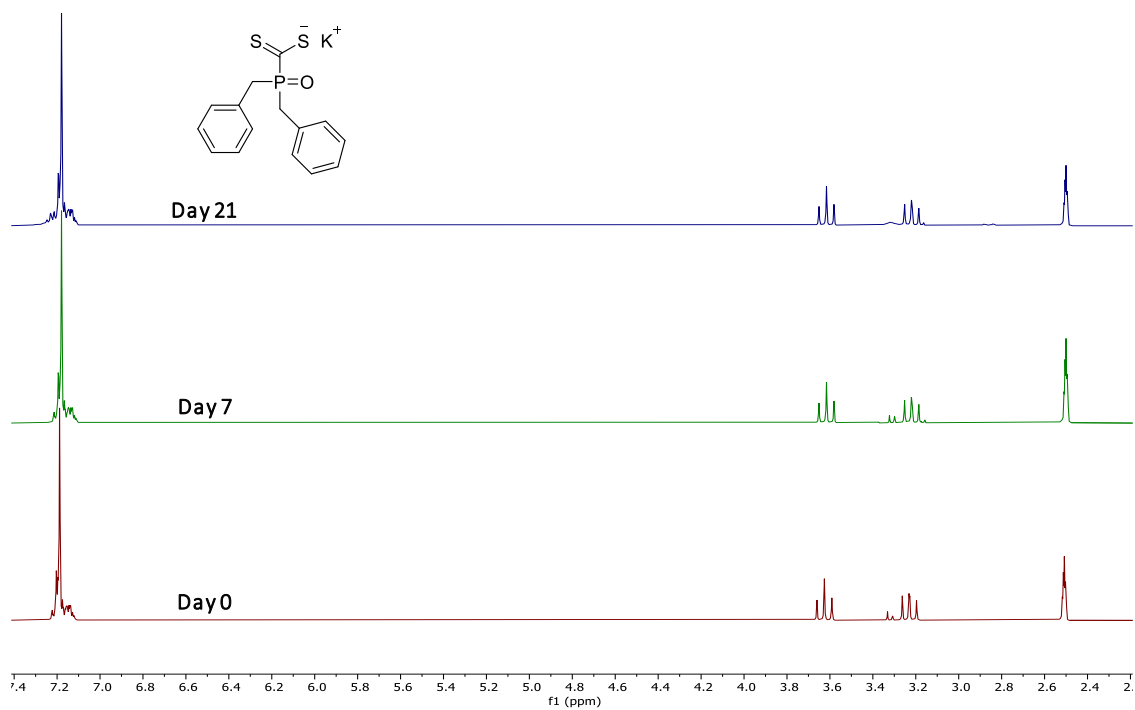

Figure S17. Comparison of  $^1\text{H}$  NMR spectra displaying the stability of K-DBPTF in  $\text{DMSO-}d_6$ .

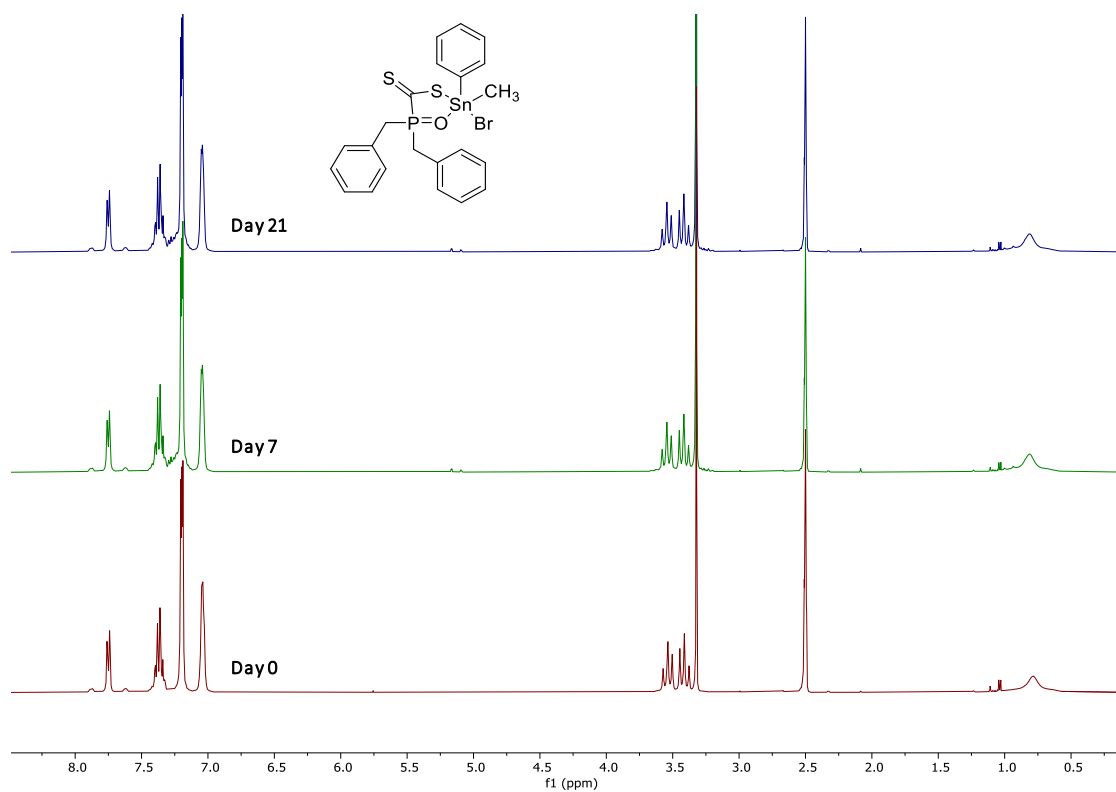

Figure S18. Comparison of  $^1\text{H}$  NMR spectra displaying the stability of Sn-DBPTF-1 in  $\text{DMSO-}d_6$ .

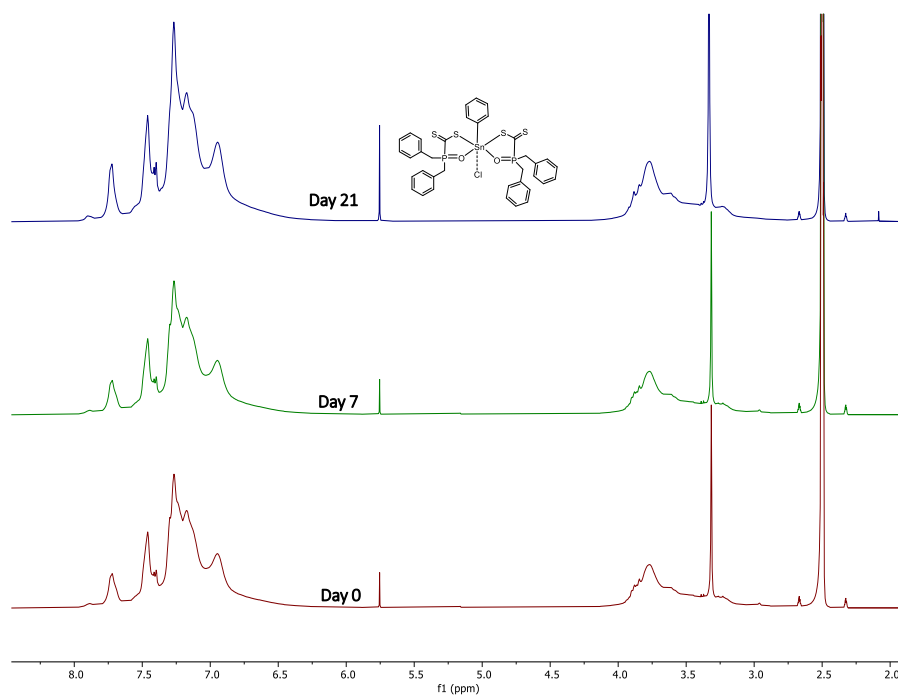

Figure S19. Comparison of  $^1\text{H}$  NMR spectra displaying the stability of Sn-DBPTF-2 in  $\text{DMSO-}d_6$ .

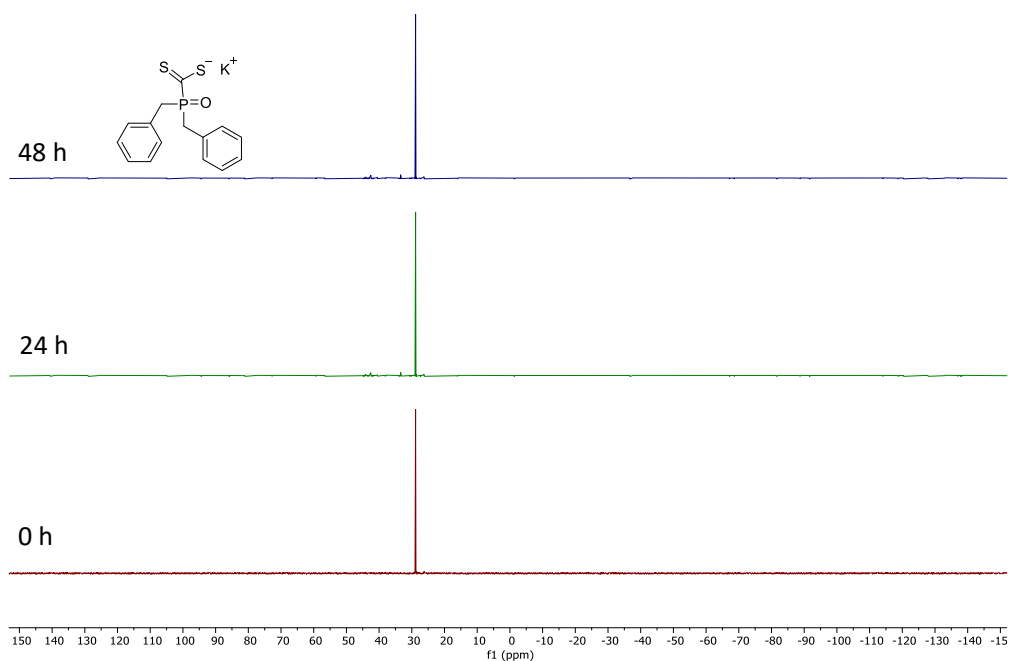

**Figure S20.** Comparison of  $^{31}\text{P}\{^1\text{H}\}$ -NMR spectrum displaying the stability of K-DBPTF in  $\text{DMSO-}d_6$ .

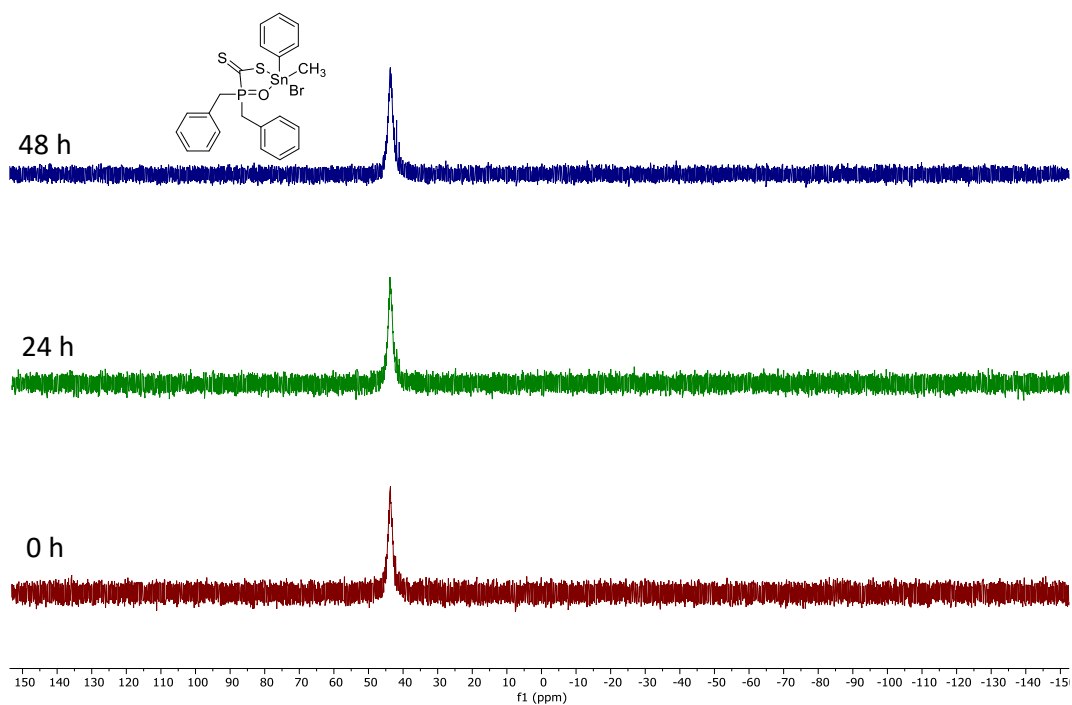

**Figure S21.** Comparison of  $^{31}\text{P}\{^1\text{H}\}$ -NMR spectrum displaying the stability Sn-DBPTF-1 in  $\text{DMSO-}d_6$ .

The stability experiments using  $^{31}\text{P}\{^1\text{H}\}$ -NMR was not performed for Sn-DBPTF-2 because of the broad NMR peaks due to the existence of several isomers at room temperature



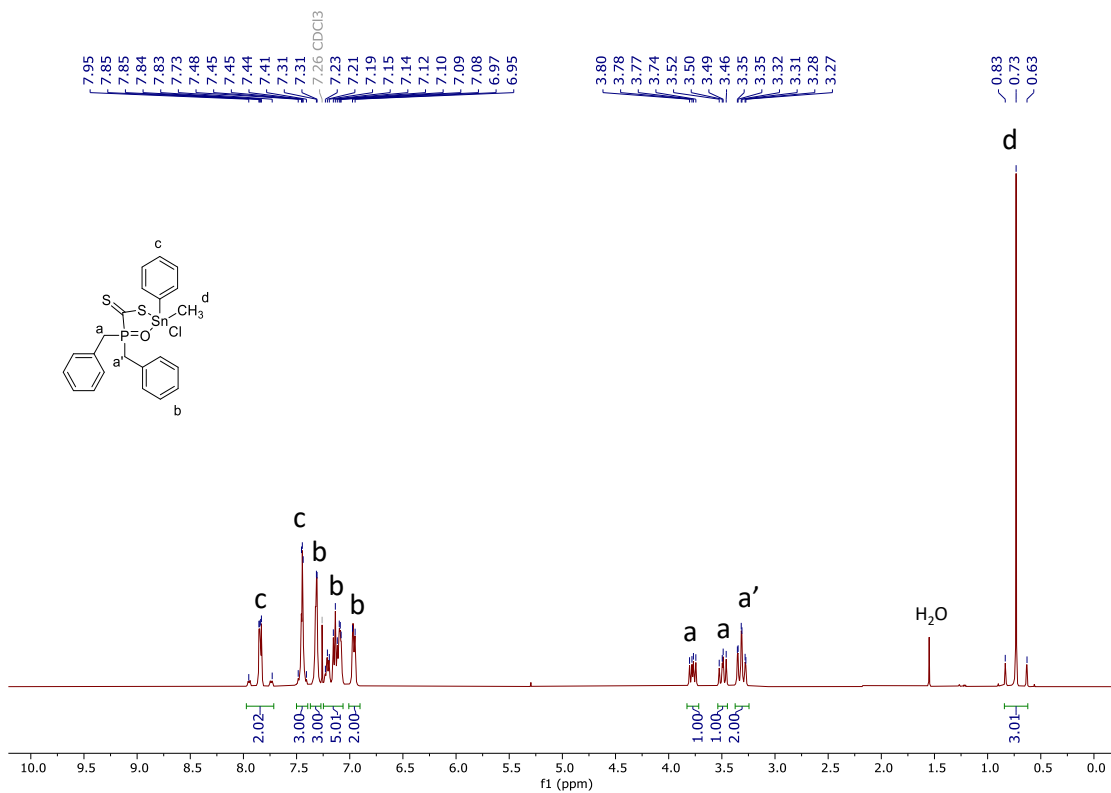

Figure S22.  $^1\text{H}$  NMR spectrum of the chloride analogue of Sn-DBPTF-1 in  $\text{CDCl}_3$ .

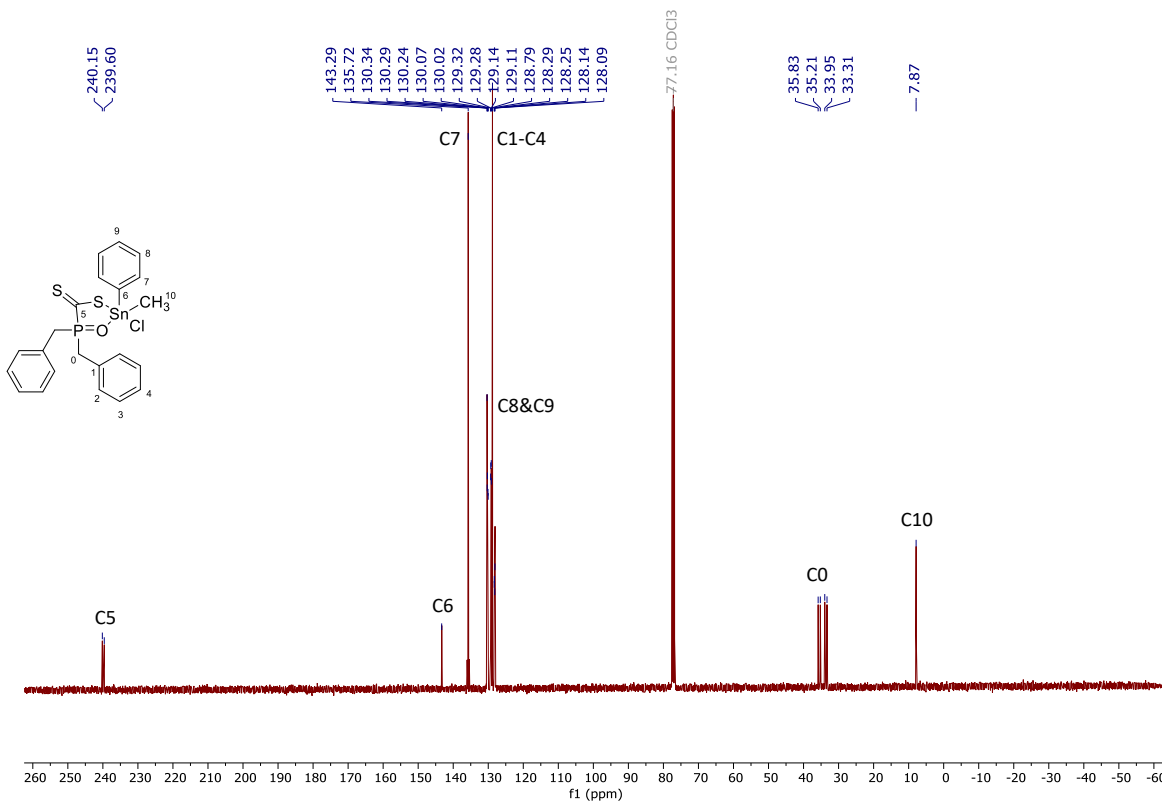

Figure S23.  $^{13}\text{C}\{^1\text{H}\}$ -NMR spectrum of the chloride analogue of Sn-DBPTF-1 in  $\text{CDCl}_3$ .

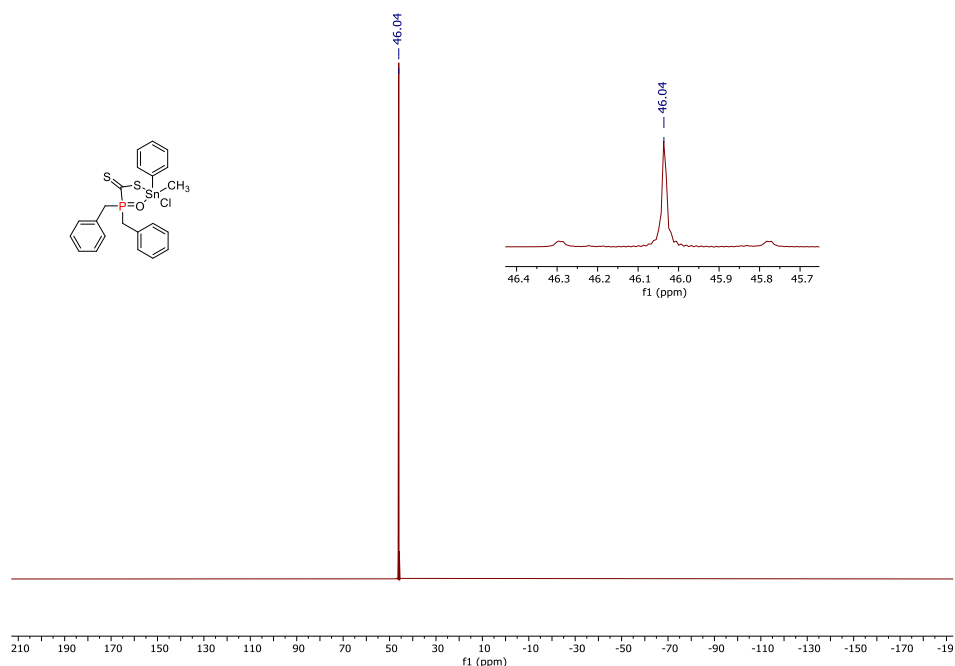

**Figure S24.**  $^{31}\text{P}\{^1\text{H}\}$ -NMR spectrum of the chloride analogue of **Sn-DBPTF-1** in  $\text{CDCl}_3$ .

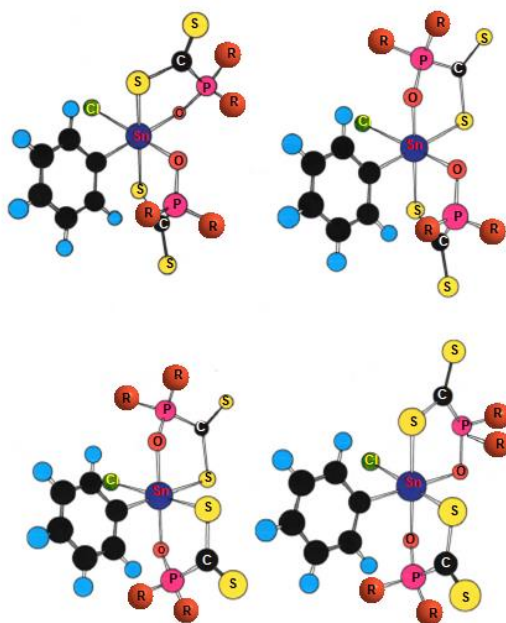

**Figure S25.** Representation of the four *cis*-(Ph, Cl) diastereoisomers in the octahedral  $[\text{SnClPh}\{\text{S}_2\text{CP}(\text{O})(\text{CH}_2\text{Ph})_2\}_2]$  molecule.

In an octahedral  $\text{SnXY}(\text{A-B})_2$  molecule several diastereoisomers are possible, A-B stands for the bidentate ligand with two different coordinating sites (oxygen and sulfur atoms). If X and Y are in *trans* position there are two stereoisomers with  $C_s$  and  $C_2$  symmetry, both with chemically equivalent ligands giving rise to one P signal in the  $^{31}\text{P}$  spectra. With X and Y in *cis* position the symmetry will be  $C_1$ , with four possible diastereoisomers all giving rise to two P signals as shown in the figure.

### 3. Mass Spectroscopy

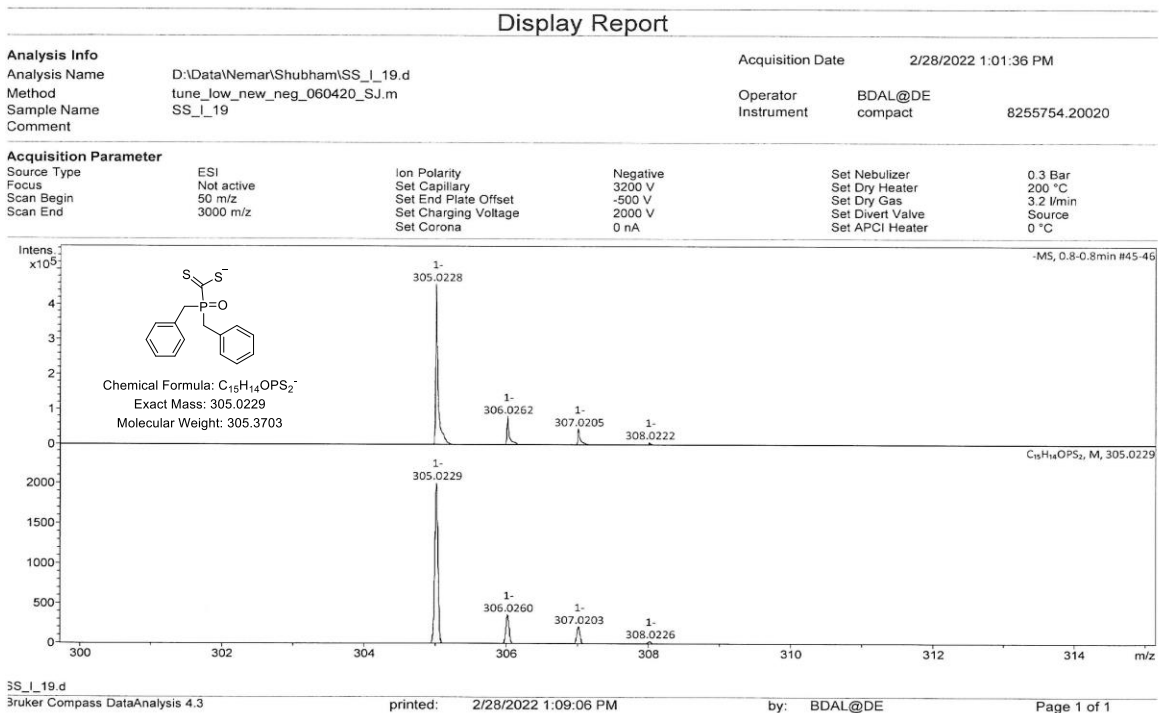

**Figure S26.** ESI-MS spectrum of K-DBPTF.

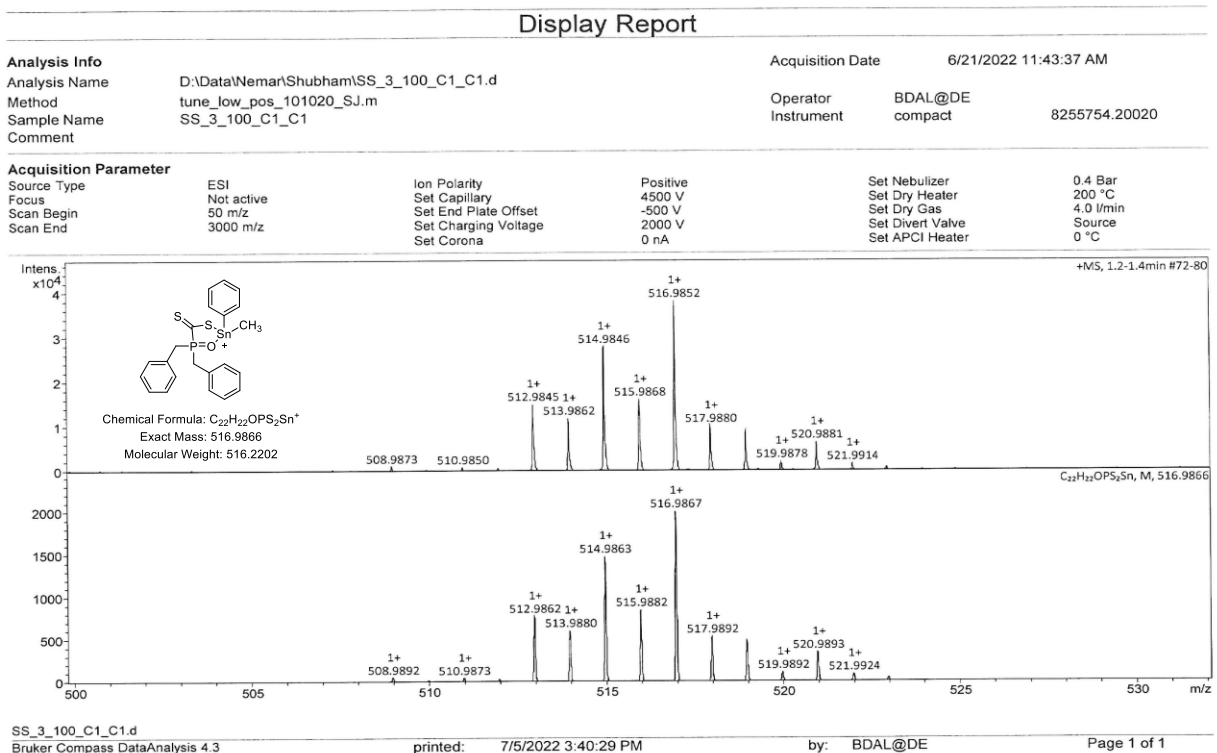

**Figure S27.** ESI-MS spectrum of Sn-DBPTF-1

### Display Report

|                                                |                                       |
|------------------------------------------------|---------------------------------------|
| <b>Analysis Info</b>                           | Acquisition Date 2/25/2022 2:28:54 PM |
| Analysis Name D:\Data\Nema\Shubham\SS_1_195C.d | Operator BDAL@DE                      |
| Method tune_mid_20jan_2016_SJ.m                | Instrument compact 8255754.20020      |
| Sample Name SS_1_195C                          |                                       |
| Comment                                        |                                       |

|                              |            |                      |          |                  |           |
|------------------------------|------------|----------------------|----------|------------------|-----------|
| <b>Acquisition Parameter</b> |            |                      |          |                  |           |
| Source Type                  | ESI        | Ion Polarity         | Positive | Set Nebulizer    | 0.4 Bar   |
| Focus                        | Not active | Set Capillary        | 4000 V   | Set Dry Heater   | 200 °C    |
| Scan Begin                   | 53 m/z     | Set End Plate Offset | -500 V   | Set Dry Gas      | 3.0 l/min |
| Scan End                     | 3300 m/z   | Set Charging Voltage | 2000 V   | Set Divert Valve | Source    |
|                              |            | Set Corona           | 0 nA     | Set APCI Heater  | 0 °C      |

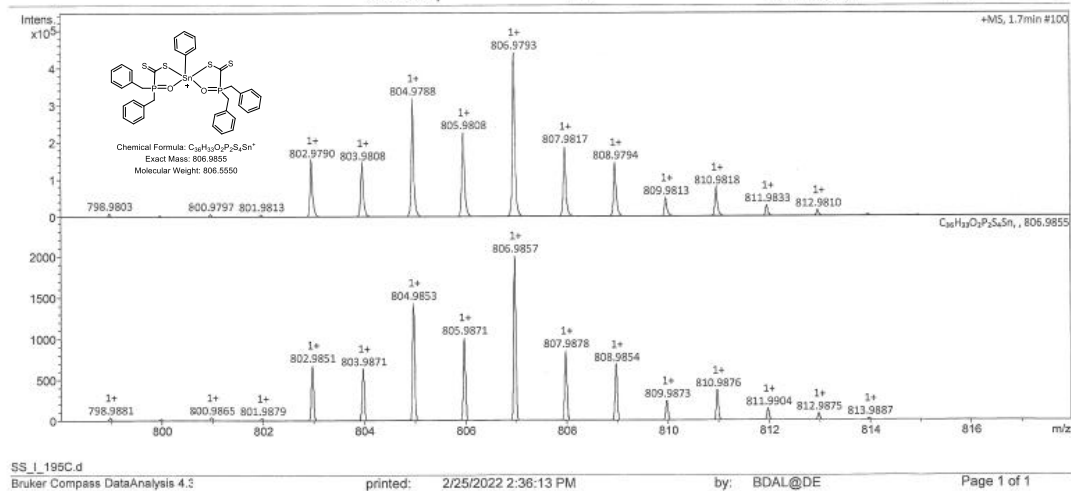

**Figure S28.** ESI-MS spectrum of Sn-DBPTF-2

### Display Report

|                                                 |                                       |
|-------------------------------------------------|---------------------------------------|
| <b>Analysis Info</b>                            | Acquisition Date 8/8/2022 10:08:35 AM |
| Analysis Name D:\Data\Nema\Shubham\SS_2_135C3.d | Operator BDAL@DE                      |
| Method tune_low_new_pos_051219_SJ.m             | Instrument compact 8255754.20020      |
| Sample Name SS_2_135C3                          |                                       |
| Comment                                         |                                       |

|                              |            |                      |          |                  |           |
|------------------------------|------------|----------------------|----------|------------------|-----------|
| <b>Acquisition Parameter</b> |            |                      |          |                  |           |
| Source Type                  | ESI        | Ion Polarity         | Positive | Set Nebulizer    | 0.3 Bar   |
| Focus                        | Not active | Set Capillary        | 4500 V   | Set Dry Heater   | 200 °C    |
| Scan Begin                   | 50 m/z     | Set End Plate Offset | -500 V   | Set Dry Gas      | 3.2 l/min |
| Scan End                     | 3000 m/z   | Set Charging Voltage | 2000 V   | Set Divert Valve | Source    |
|                              |            | Set Corona           | 0 nA     | Set APCI Heater  | 0 °C      |

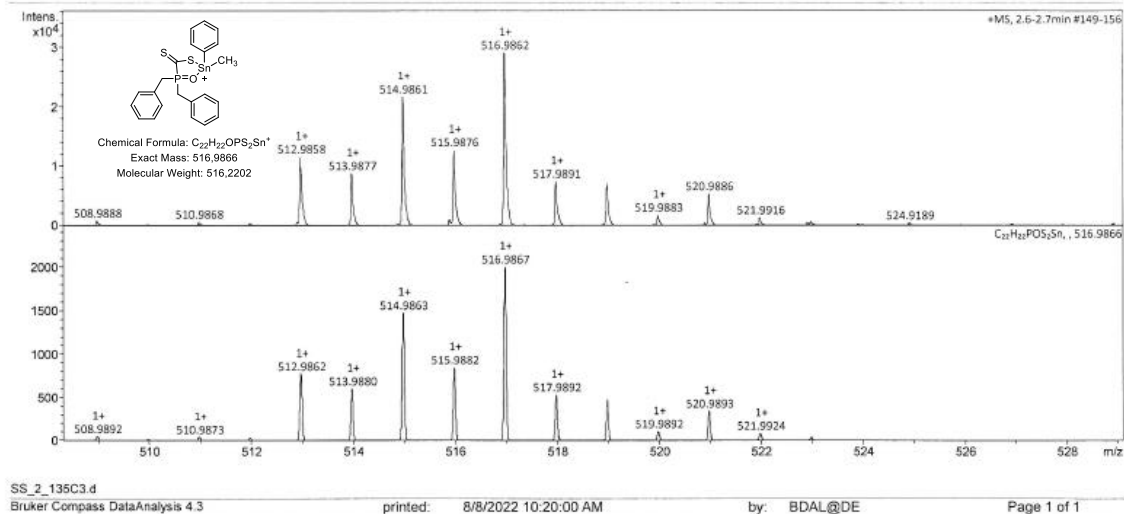

**Figure S29.** ESI-MS spectrum of the chloride analogue of Sn-DBPTF-1, MS-ESI(m/z) calcd. for  $C_{22}H_{22}OPS_2Sn^+ [M-Cl]^+$  : 516.9867, found 516.9862

## 4. X-ray crystallography

Table S2: Crystal data

| Crystal data                                                          | K-DBPTF                                             | Sn-DBPTF-1                                            | Sn-DBPTF-2                                                                        |
|-----------------------------------------------------------------------|-----------------------------------------------------|-------------------------------------------------------|-----------------------------------------------------------------------------------|
| Empirical formula                                                     | C <sub>15</sub> H <sub>14</sub> KOPS <sub>2</sub>   | C <sub>22</sub> H <sub>22</sub> BrOPS <sub>2</sub> Sn | C <sub>36</sub> H <sub>33</sub> ClO <sub>2</sub> P <sub>2</sub> S <sub>4</sub> Sn |
| Color                                                                 | Red                                                 | Violet                                                | Red-violet                                                                        |
| Formula weight                                                        | 344.45                                              | 596.08                                                | 841.94                                                                            |
| Crystal size (mm)                                                     | 0.30 x 0.25 x 0.11                                  | 0.27 x 0.18 x 0.09                                    | 0.50 x 0.24 x 0.15                                                                |
| Crystal system                                                        | monoclinic                                          | monoclinic                                            | orthorhombic                                                                      |
| Space group                                                           | <i>P2<sub>1</sub>/n</i>                             | <i>P2<sub>1</sub>/n</i>                               | <i>Pna2<sub>1</sub></i>                                                           |
| a (Å)                                                                 | 10.8009(7)                                          | 10.8987(7)                                            | 40.622(2)                                                                         |
| b (Å)                                                                 | 7.8664(5)                                           | 14.6186(11)                                           | 11.0930(7)                                                                        |
| c (Å)                                                                 | 19.3106(12)                                         | 14.7512(10)                                           | 17.1001(9)                                                                        |
| α (°)                                                                 | 90                                                  | 90                                                    | 90                                                                                |
| β (°)                                                                 | 92.231(2)                                           | 91.544(2)                                             | 90                                                                                |
| γ (°)                                                                 | 90                                                  | 90                                                    | 90                                                                                |
| Volume (Å <sup>3</sup> )                                              | 1639.47(18)                                         | 2349.4(3)                                             | 7705.7(8)                                                                         |
| Z                                                                     | 4                                                   | 4                                                     | 8                                                                                 |
| D <sub>calc.</sub> (g/cm <sup>3</sup> )                               | 1.396                                               | 1.685                                                 | 1.451                                                                             |
| F(000)                                                                | 712                                                 | 1176                                                  | 3408                                                                              |
| μ (mm <sup>-1</sup> )                                                 | 0.668                                               | 3.045                                                 | 1.063                                                                             |
| Temperature (K)                                                       | 150(2)                                              | 150(2)                                                | 150(2)                                                                            |
| Reflections collected/<br>unique/observed [ <i>I</i> >2σ( <i>I</i> )] | 51135/ 6241/ 5709                                   | 52852/ 5430/ 4623                                     | 105525/ 15071/<br>14326                                                           |
| Data/restraints/parameters                                            | 6241/ 0/ 181                                        | 5430/ 0/ 254                                          | 15071/ 1/ 859                                                                     |
| Goodness of fit on F <sup>2</sup>                                     | 1.077                                               | 1.037                                                 | 1.106                                                                             |
| Final R indices [ <i>I</i> >2σ( <i>I</i> )]                           | R <sub>1</sub> = 0.0233<br>wR <sub>2</sub> = 0.0640 | R <sub>1</sub> = 0.0267<br>wR <sub>2</sub> = 0.0642   | R <sub>1</sub> = 0.0336<br>wR <sub>2</sub> = 0.0739                               |
| R indices (all data)                                                  | R <sub>1</sub> = 0.0268<br>wR <sub>2</sub> = 0.0659 | R <sub>1</sub> = 0.0363<br>wR <sub>2</sub> = 0.0686   | R <sub>1</sub> = 0.0368<br>wR <sub>2</sub> = 0.0754                               |

**Table S3: Selected bond length/bond angle of the metal centre of Sn-DBPTF-1 and Sn-DBPTF-2**

| <b>SnDBPTF-1</b>       |            |                       |            |                |            |
|------------------------|------------|-----------------------|------------|----------------|------------|
| <b>Bond length (Å)</b> |            | <b>Bond Angle (°)</b> |            |                |            |
| Sn1–Br1                | 2.6060(4)  | Br1–Sn1–S2            | 81.61(2)   | S2–Sn1–C21     | 120.08(8)  |
| Sn1–S2                 | 2.4795(8)  | Br1–Sn1–O6            | 163.44(5)  | S2–Sn1–C27     | 117.16(12) |
| Sn1–O6                 | 2.234(2)   | Br1–Sn1–C21           | 98.64(8)   | O6–Sn1–C21     | 90.91(10)  |
| Sn1–C21                | 2.130(3)   | Br1–Sn1–C27           | 96.05(9)   | O6–Sn1–C27     | 90.14(10)  |
| Sn1–C27                | 2.101(3)   | S2–Sn1–O6             | 81.89(5)   | C21–Sn1–C27    | 122.28(14) |
| <b>SnDBPTF-2</b>       |            |                       |            |                |            |
| Sn1–Cl1                | 2.4400(16) | Cl1–Sn1–S2            | 92.61(6)   | Cl1A–Sn1A–S2A  | 85.0(4)    |
| Sn1–S2                 | 2.5610(18) | Cl1–Sn1–S21           | 86.57(5)   | Cl1A–Sn1A–S21A | 93.8(4)    |
| Sn1–S21                | 2.5688(15) | Cl1–Sn1–O6            | 171.27(10) | Cl1A–Sn1A–O6A  | 96.6(4)    |
| Sn1–O6                 | 2.187(4)   | Cl1–Sn1–O25           | 94.82(10)  | Cl1A–Sn1A–O25A | 169.7(5)   |
| Sn1–O25                | 2.120(4)   | Cl1–Sn1–C40           | 102.11(15) | Cl1A–Sn1A–C40A | 98.0(5)    |
| Sn1–C40                | 2.151(6)   | S2–Sn1–S21            | 85.93(5)   | S2A–Sn1A–S21A  | 84.81(17)  |
| Sn1A–Cl1A              | 2.458(12)  | S2–Sn1–O6             | 83.43(10)  | S2A–Sn1A–O6A   | 82.5(2)    |
| Sn1A–S2A               | 2.588(6)   | S2–Sn1–O25            | 165.96(10) | S2A–Sn1A–O25A  | 85.0(2)    |
| Sn1A–S21A              | 2.596(6)   | S2–Sn1–C40            | 98.66(15)  | S2A–Sn1A–C40A  | 174.6(3)   |
| Sn1A–O6A               | 2.116(6)   | S21–Sn1–O6            | 85.40(10)  | S21A–Sn1A–O6A  | 162.8(3)   |
| Sn1A–O25A              | 2.167(6)   | S21–Sn1–O25           | 82.64(10)  | S21A–Sn1A–O25A | 82.6(2)    |
| Sn1A–C40A              | 2.140(8)   | S21–Sn1–C40           | 169.91(17) | S21A–Sn1A–C40A | 99.4(3)    |
|                        |            | O6–Sn1–O25            | 87.53(14)  | O6A–Sn1A–O25A  | 84.8(2)    |
|                        |            | O6–Sn1–C40            | 86.21(17)  | O6A–Sn1A–C40A  | 92.7(3)    |
|                        |            | O25–Sn1–C40           | 91.42(18)  | O25A–Sn1A–C40A | 92.2(3)    |

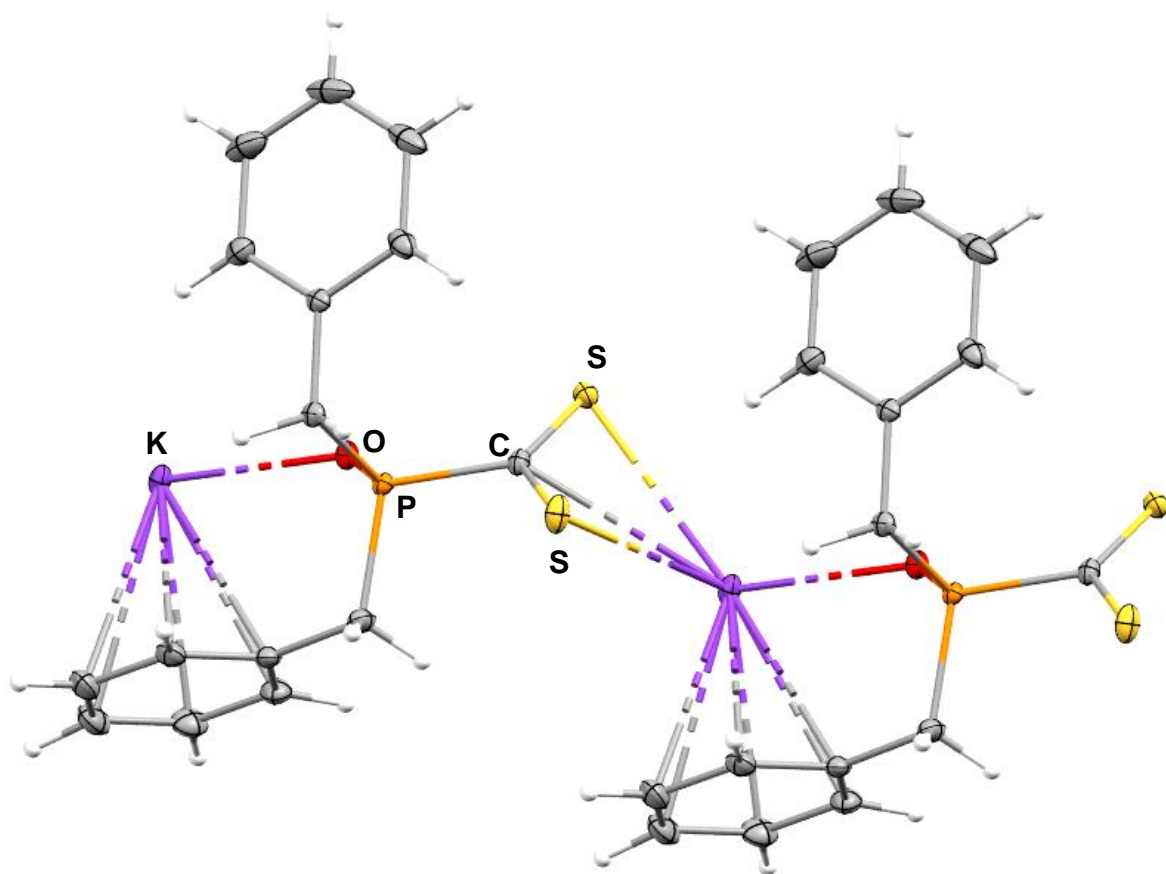

**Figure S30.** Interaction between the phenyl group of the ligand and the potassium ion via cation- $\pi$  interaction

## 5. Powder X-ray Diffraction (PXRD)

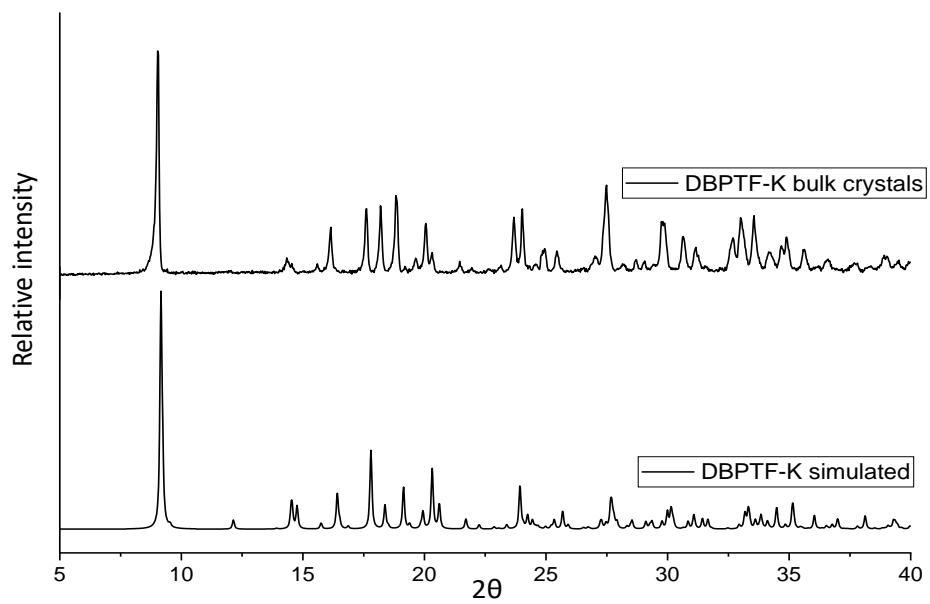

**Figure S31.** Comparison of PXRD pattern of bulk crystals and the simulated pattern of K-DBPTF.

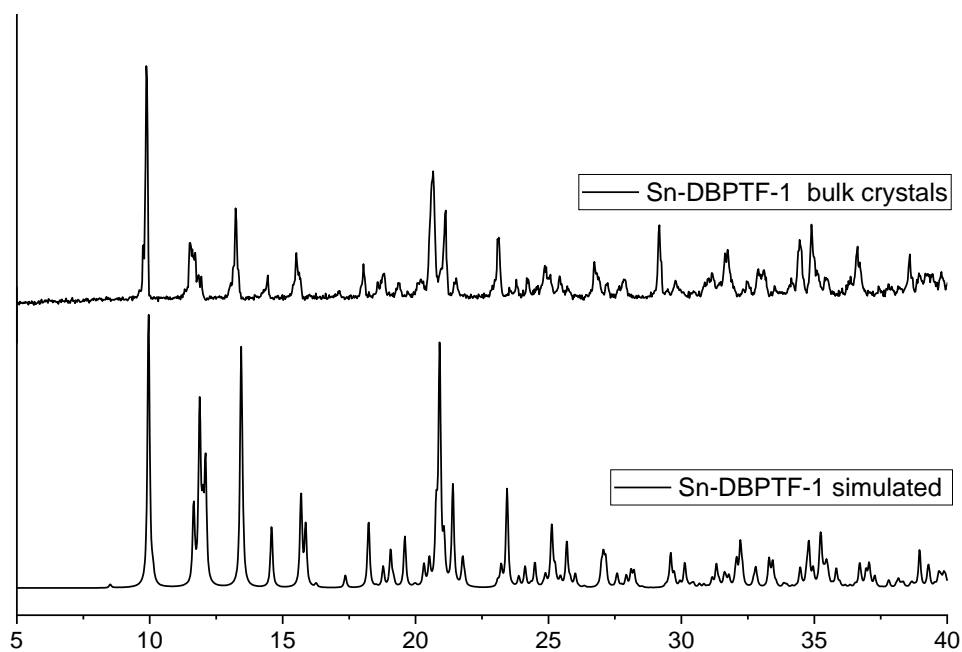

**Figure S32.** Comparison of PXRD pattern of bulk crystals and the simulated pattern of Sn-DBPTF-1.



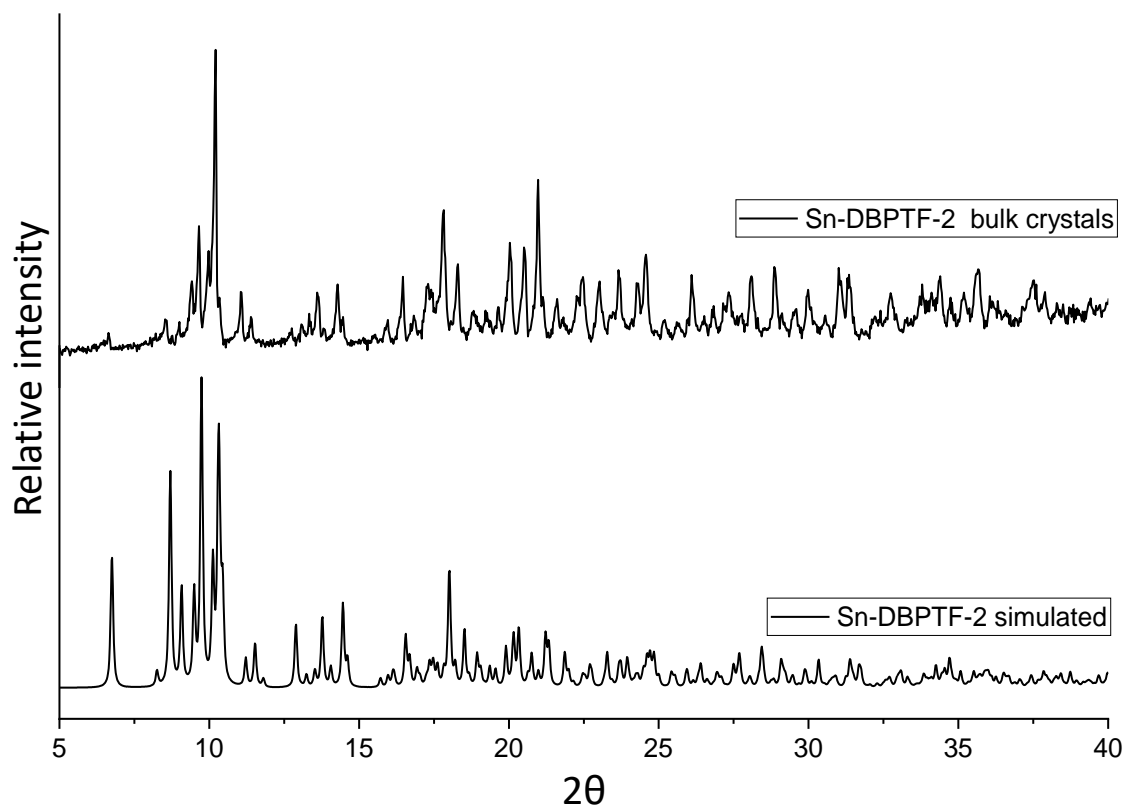

**Figure S33.** Comparison of PXRD pattern of bulk crystals and the simulated pattern of **Sn-DBPTF-2**.

## 6. Stability experiments in PBS solutions

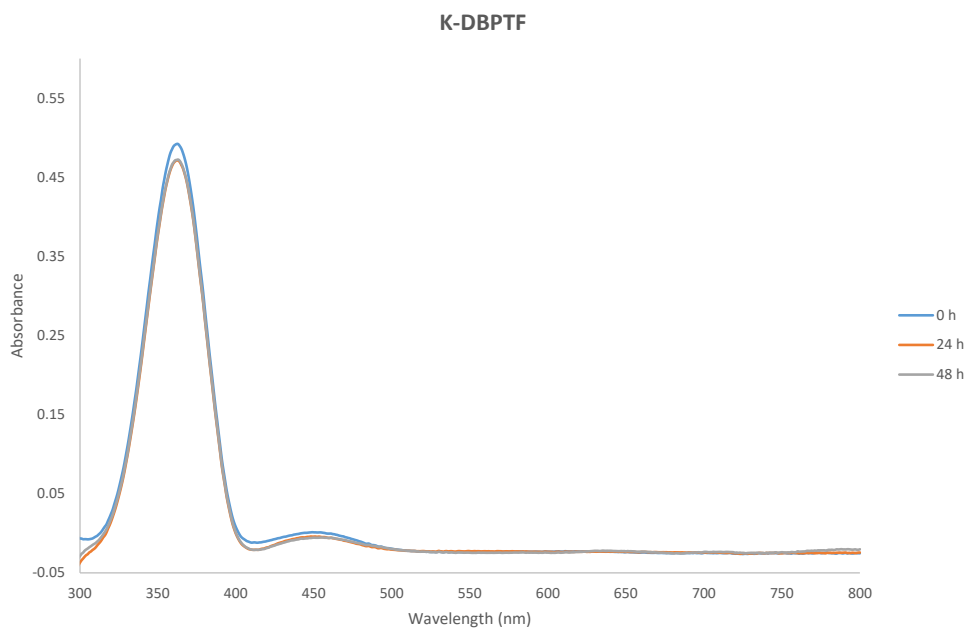

**Figure S34.** Comparison of UV-Vis spectra displaying the stability of K-DBPTF in PBS/DMSO solution (1:1, v/v).

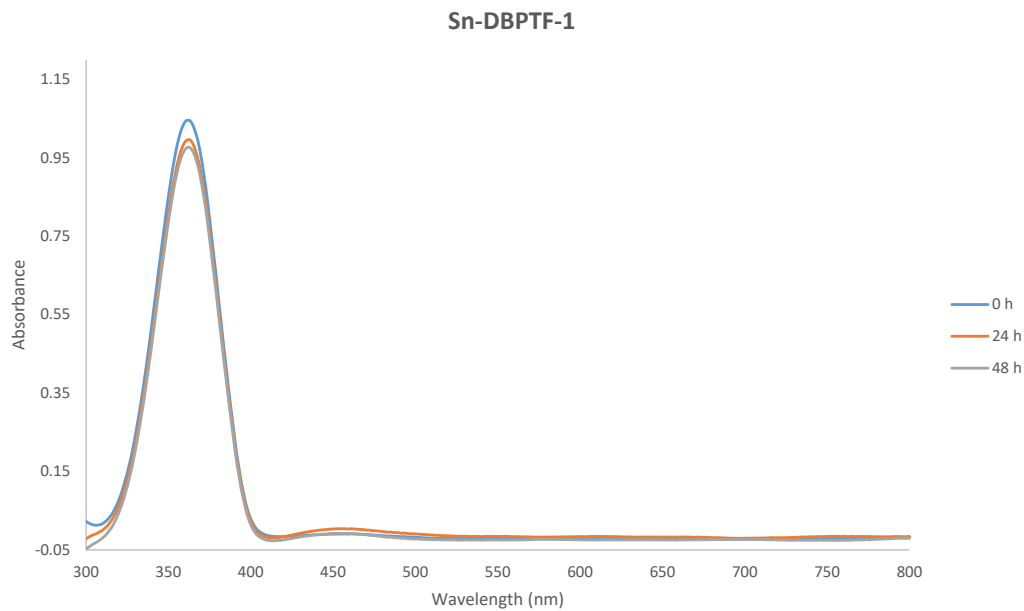

**Figure S35.** Comparison of UV-Vis spectra displaying the stability of Sn-DBPTF-1 in PBS/DMSO solution (1:1, v/v).

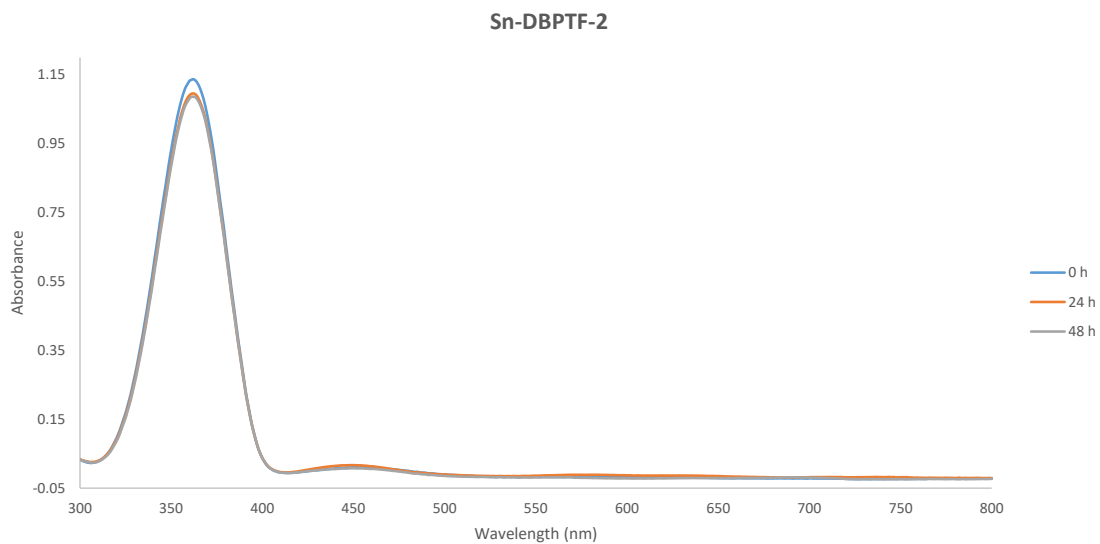

**Figure S36.** Comparison of UV-Vis spectra displaying the stability of **Sn-DBPTF-1** in PBS/DMSO solution (1:1, v/v).

## 7. Determination and Comparison of IC<sub>50</sub> values [μg/mL]

A. = Sn-DBPTF-1, B. = Sn-DBPTF-2 and C. = cisplatin

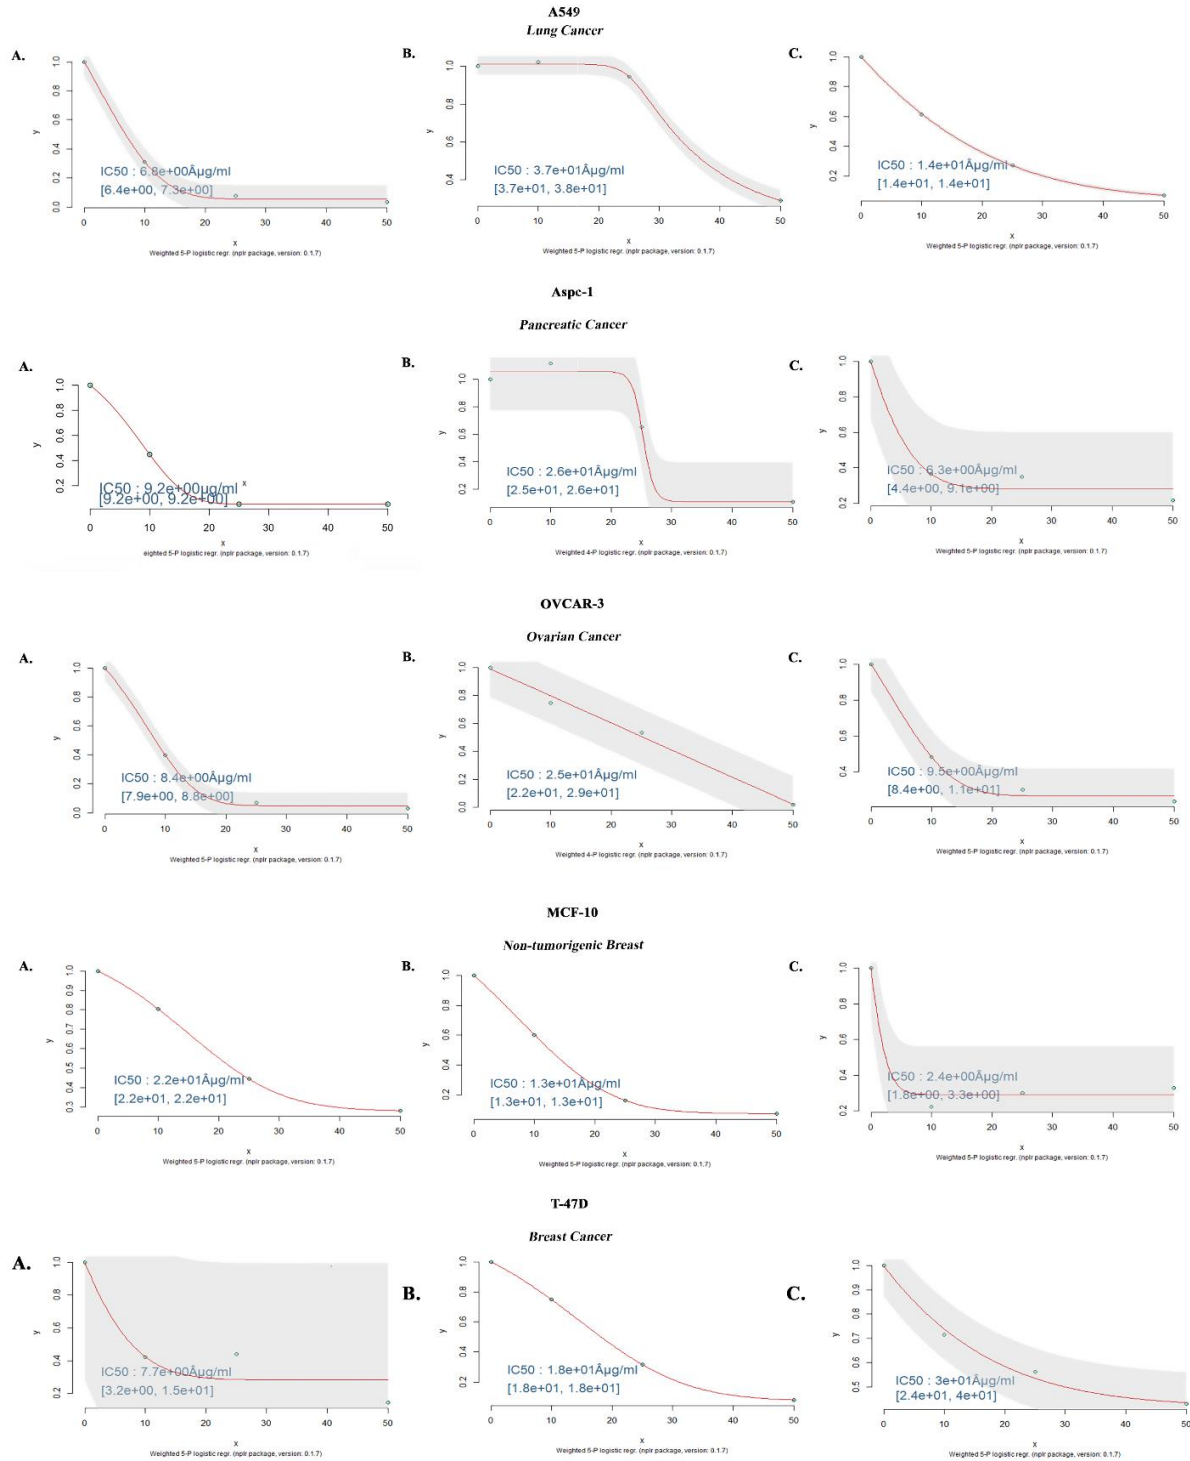

**Figure S37.** Determination of IC<sub>50</sub> values of tested cell lines in the presence of Sn-DBPTF-1, Sn-DBPTF-2 & cisplatin, and corresponding treatment by parametric logistic regression in R.

A. = Sn-DBPTF-1 and C. = cisplatin

**HCT116+Chr.2**

*MMR-deficient Colon Cancer*

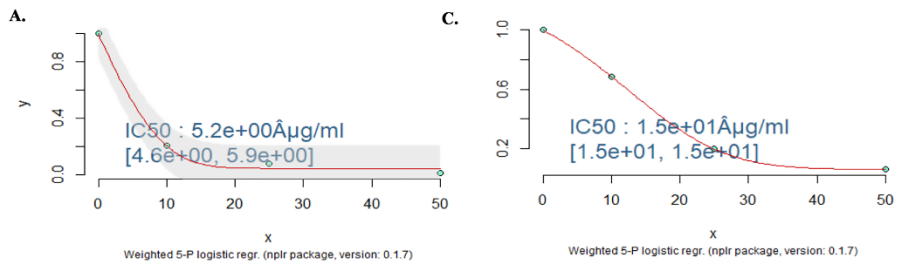

**HCT116+Chr.3**

*MMR-proficient Colon Cancer*

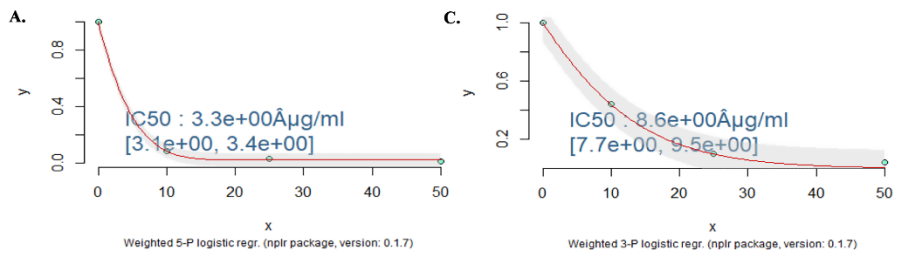

**D492**

*Non-tumorigenic Breast Epithelial*

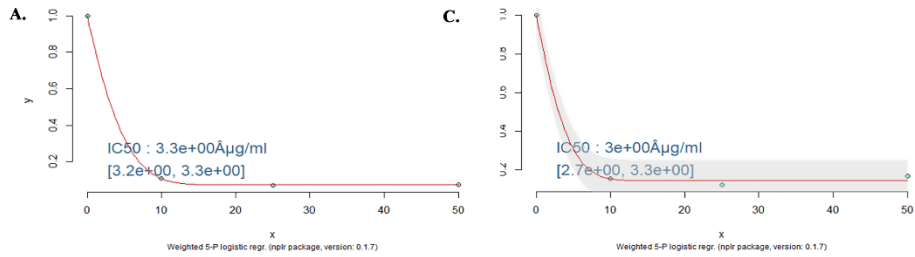

**D492 HER-2**

*Tumorigenic Breast Mesenchymal*

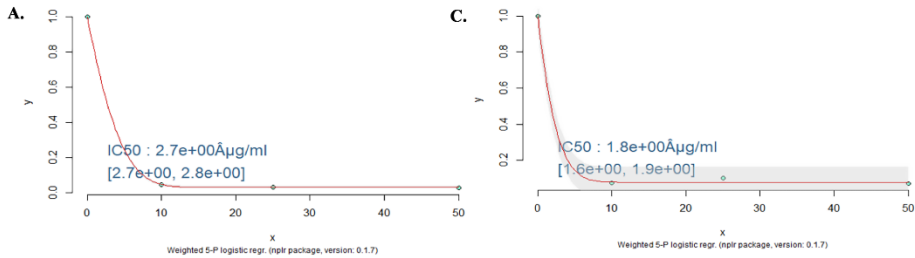

**Figure S38.** Determination of  $IC_{50}$  values of tested cell lines in the presence of **Sn-DBPTF-1** & cisplatin, and corresponding treatment by parametric logistic regression in R.

**Table S4.** Comparison of IC<sub>50</sub> values [ $\mu\text{g}/\text{mL}$ ] and confidence intervals (95.0%) of tested **Sn-DBPTF-1** and **Sn-DBPTF-2** with the ligand.

| Cell lines | Sn-DBPTF-1       |          | Sn-DBPTF-2       |           | Ligand           |      |
|------------|------------------|----------|------------------|-----------|------------------|------|
|            | IC <sub>50</sub> | CI       | IC <sub>50</sub> | CI        | IC <sub>50</sub> | CI   |
| Aspc-1     | 9.2              | 9.2-9.2  | 26.0             | 25.0-26.0 | >100             | >100 |
| T-47D      | 7.7              | 3.2-15.0 | 18.0             | 18.0-18.0 | >100             | >100 |
| A549       | 6.8              | 6.4-7.3  | 37.0             | 37.0-38.0 | >100             | >100 |

**Table S5.** Comparison of IC<sub>50</sub> values [ $\mu\text{g}/\text{mL}$ ] and confidence intervals (95.0%) of tested **Sn-DBPTF-1** and with the chloride analogue.

| Cell lines | Sn-DBPTF-1       |          | Chloride analogue of Sn-DBPTF-1 |       |
|------------|------------------|----------|---------------------------------|-------|
|            | IC <sub>50</sub> | CI       | IC <sub>50</sub>                | CI    |
| Aspc-1     | 9.2              | 9.2-9.2  | 12.5                            | 10-15 |
| T-47D      | 7.7              | 3.2-15.0 | 7.5                             | 5-10  |
| A549       | 6.8              | 6.4-7.3  | 27.5                            | 25-30 |

## 8. Apoptosis

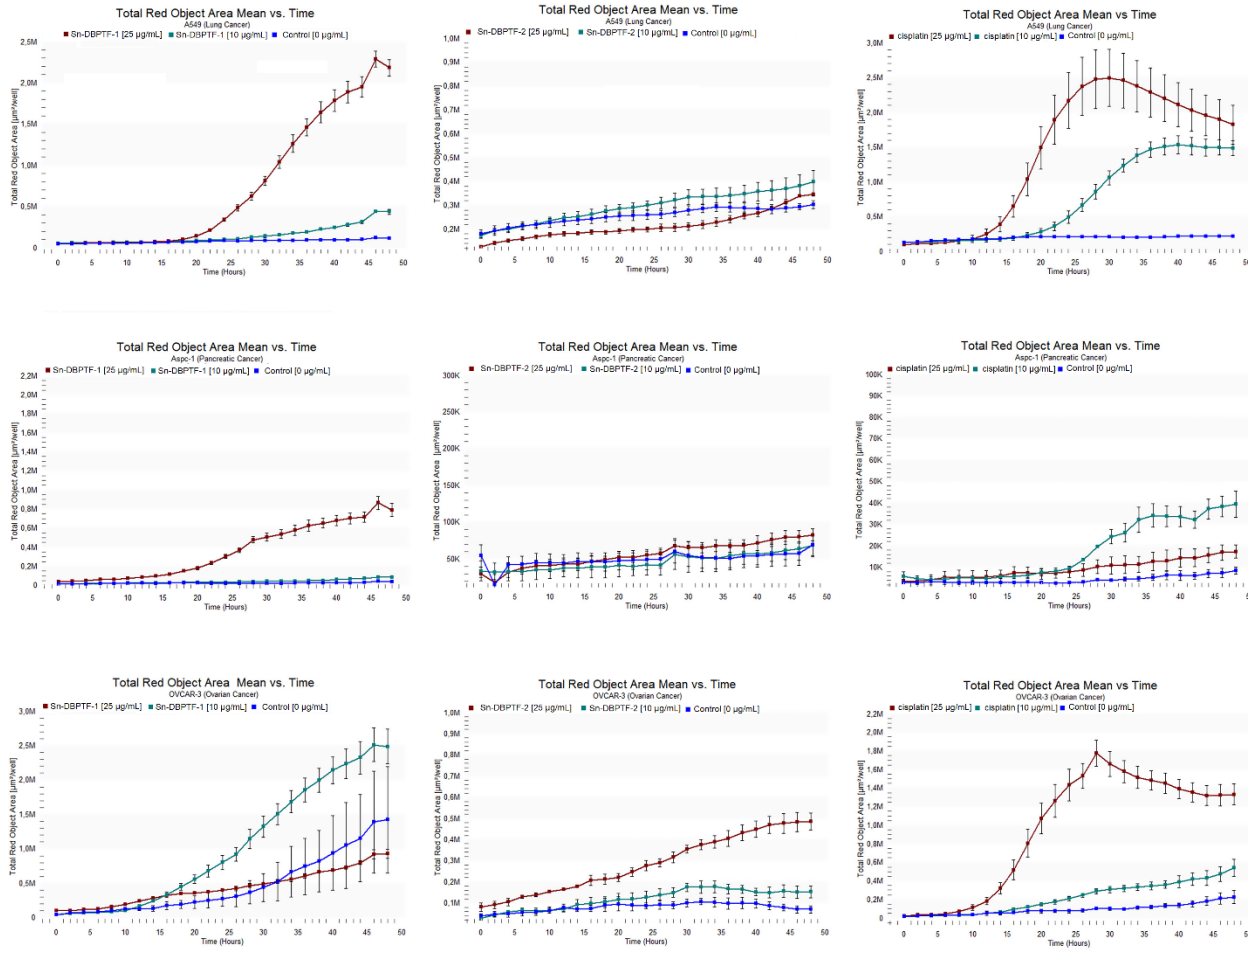

**Figure S39.** Mean of total red object area of tested cell lines stained with Annexin V within 48 hours of corresponding treatment in IncuCyte Zoom.

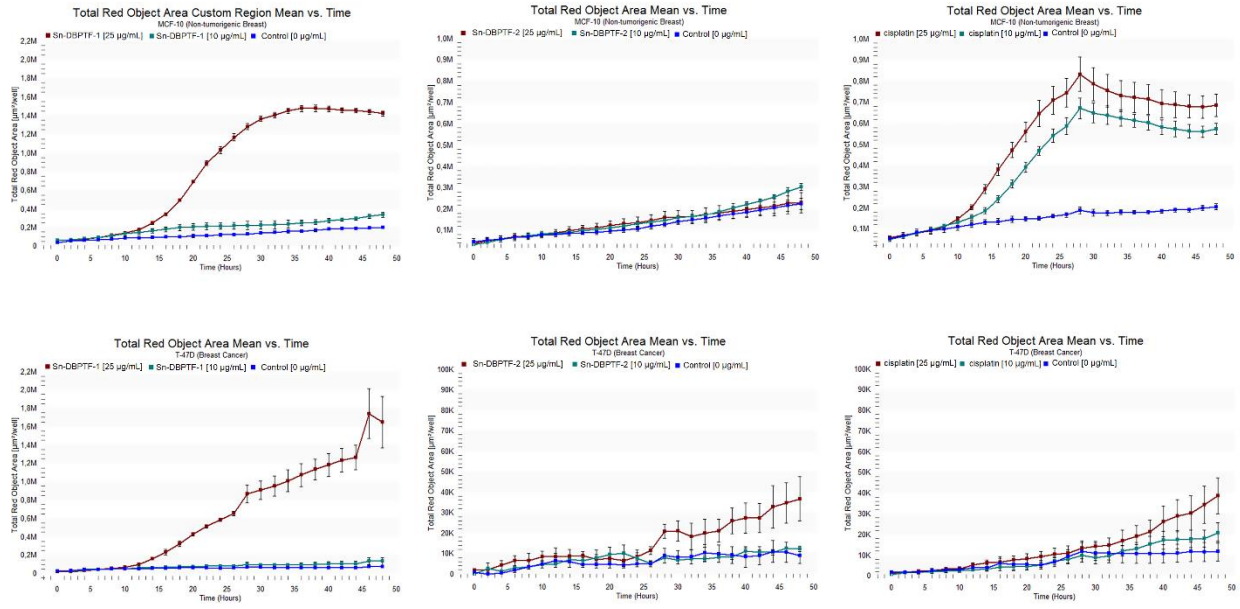

**Figure S40.** Mean of total red object area of tested cell lines stained with Annexin V within 48 hours of corresponding treatment in IncuCyte Zoom.



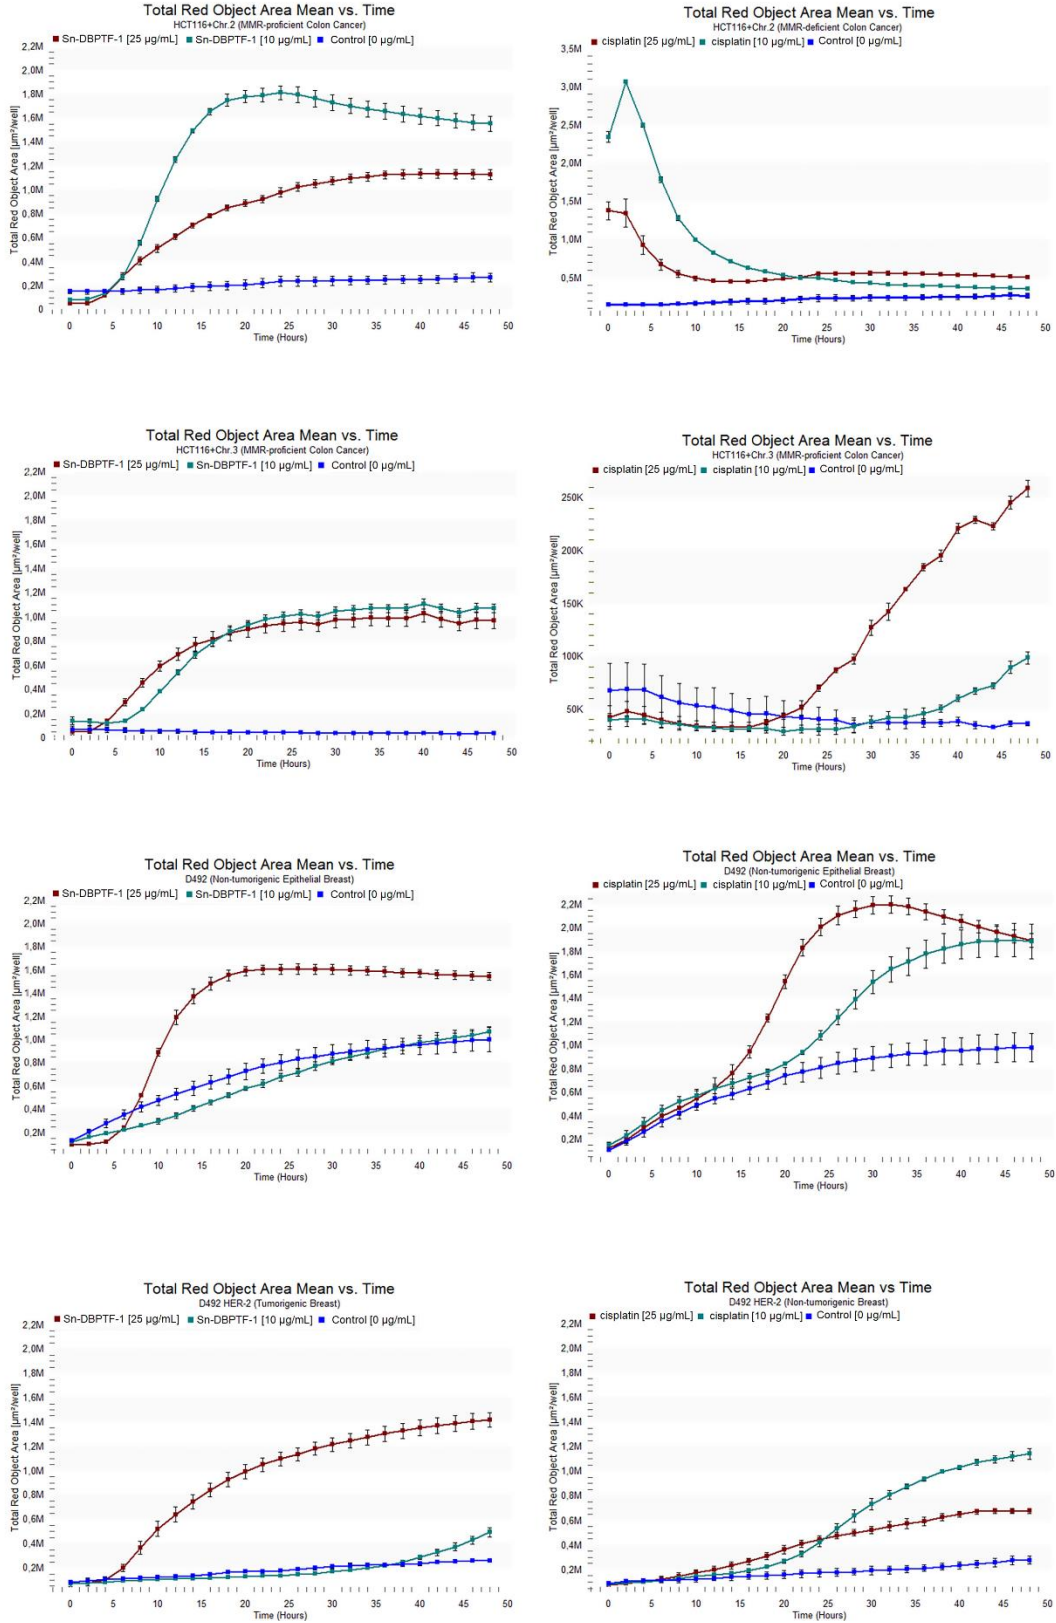

**Figure S41.** Mean of total red object area of tested cell lines stained with Annexin V within 48 hours of corresponding treatment in IncuCyte Zoom.

## 9. Double strand break (DBS) studies

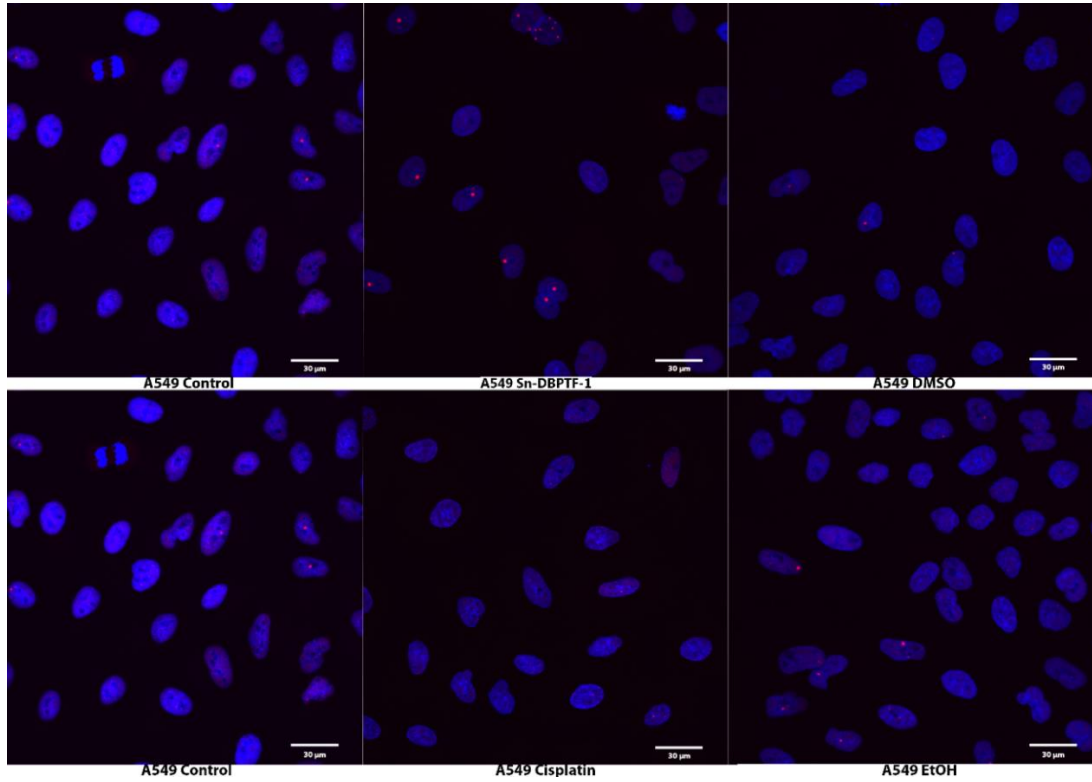

**Figure S42.** Immunostaining with DAPI and anti-53BP1 of A549 cells.

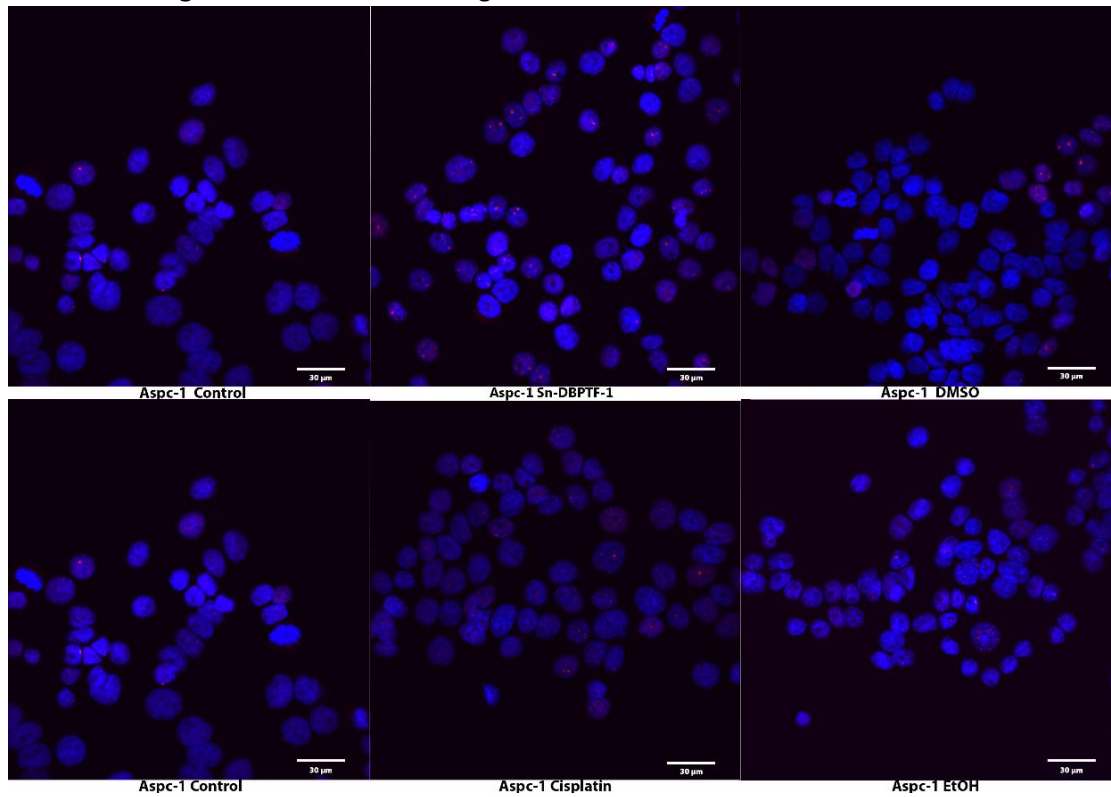

**Figure S43.** Immunostaining with DAPI and anti-53BP1 of Aspc-1 cells.

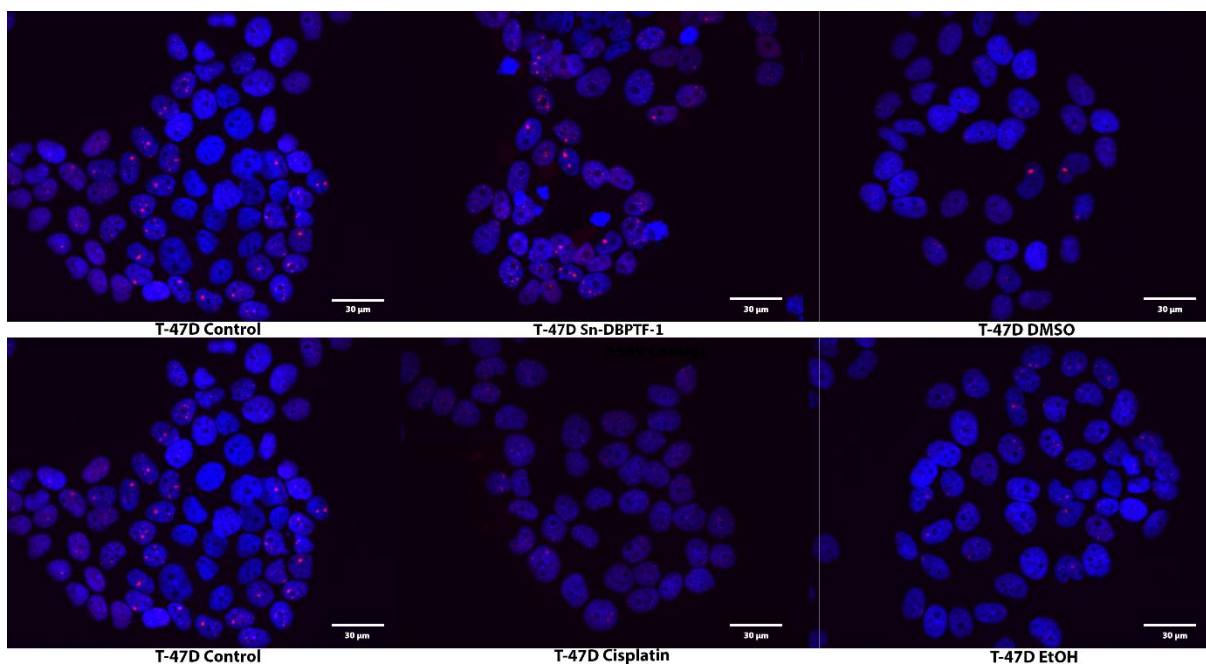

**Figure S44.** Immunostaining with DAPI and anti-53BP1 of T-47D cells.

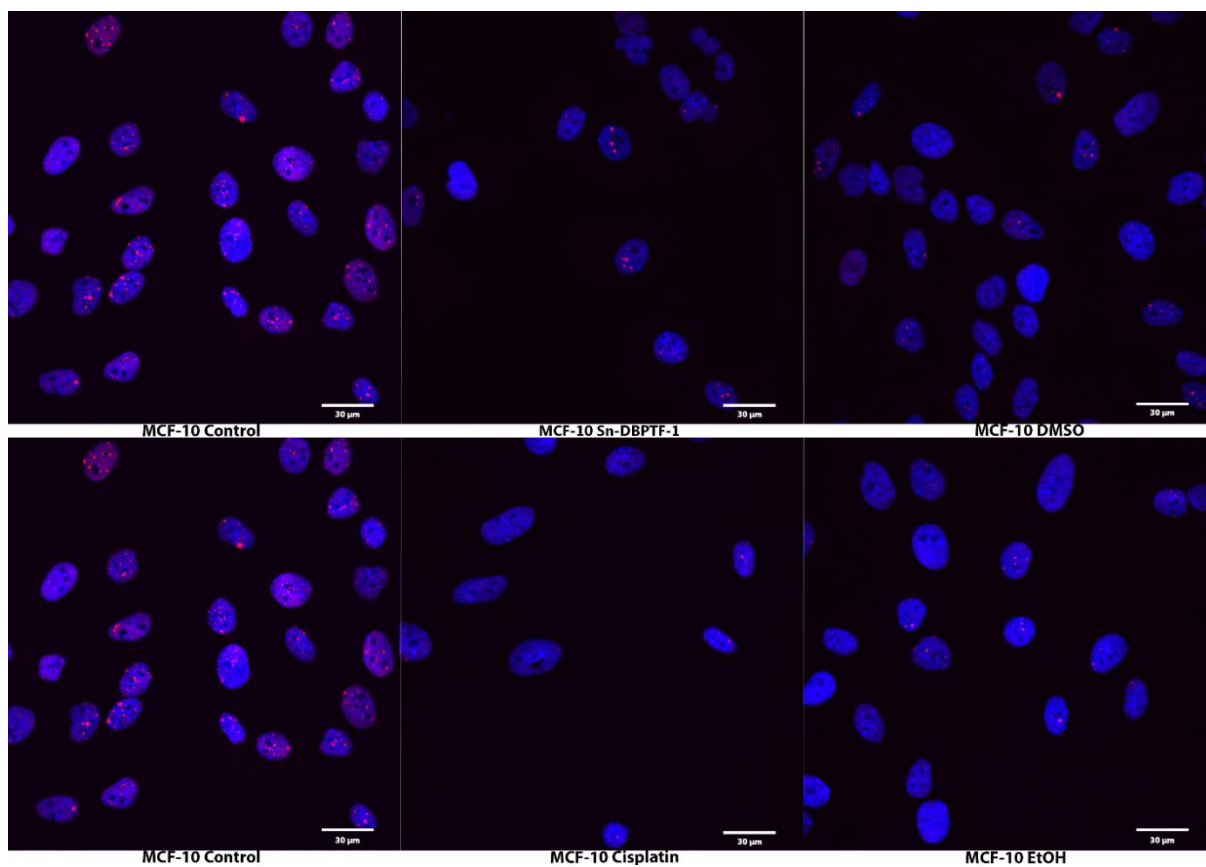

**Figure S45.** Immunostaining with DAPI and anti-53BP1 of MCF-10 cells.

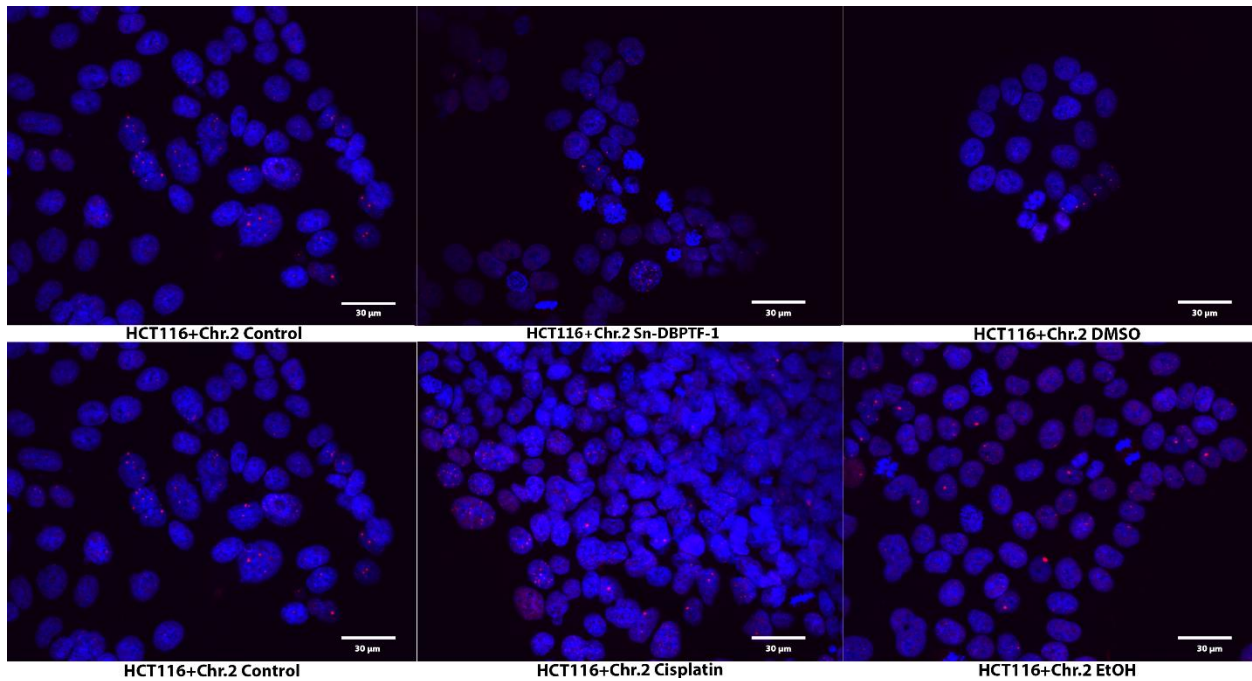

**Figure S46.** Immunostaining with DAPI and anti-53BP1 of HCT116+Chr.2 cells.

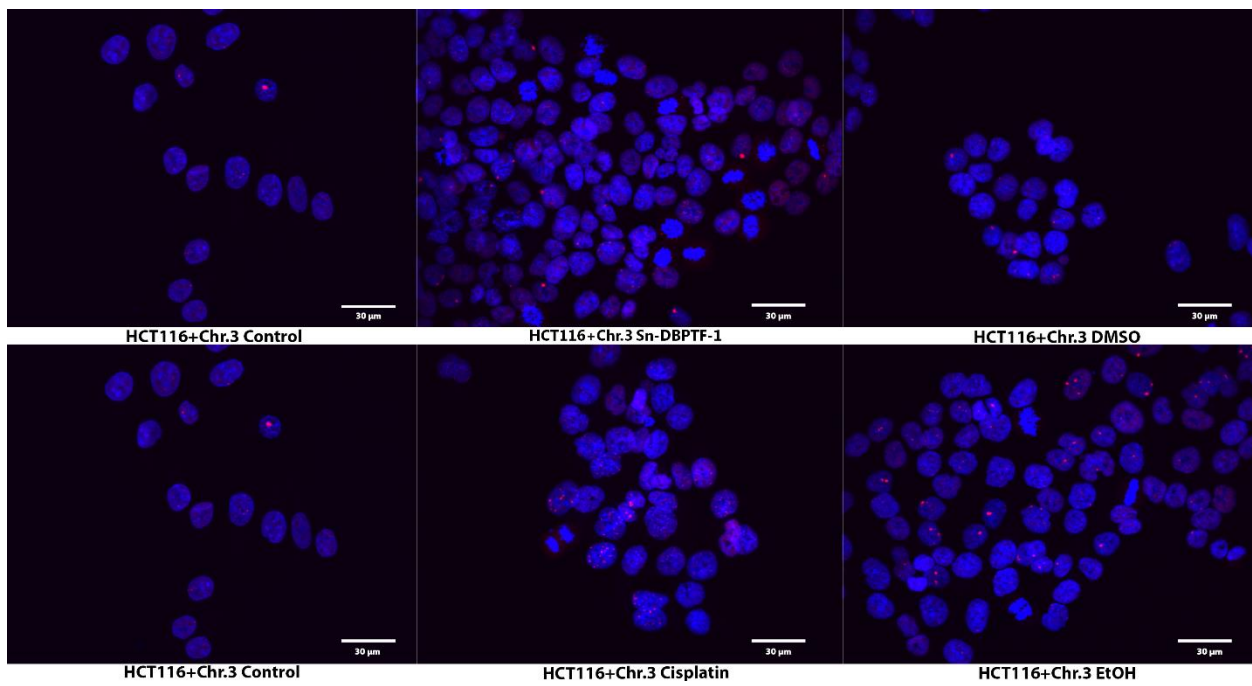

**Figure S47.** Immunostaining with DAPI and anti-53BP1 of HCT116+Chr.3 cells.



# 10. Flow Cytometry

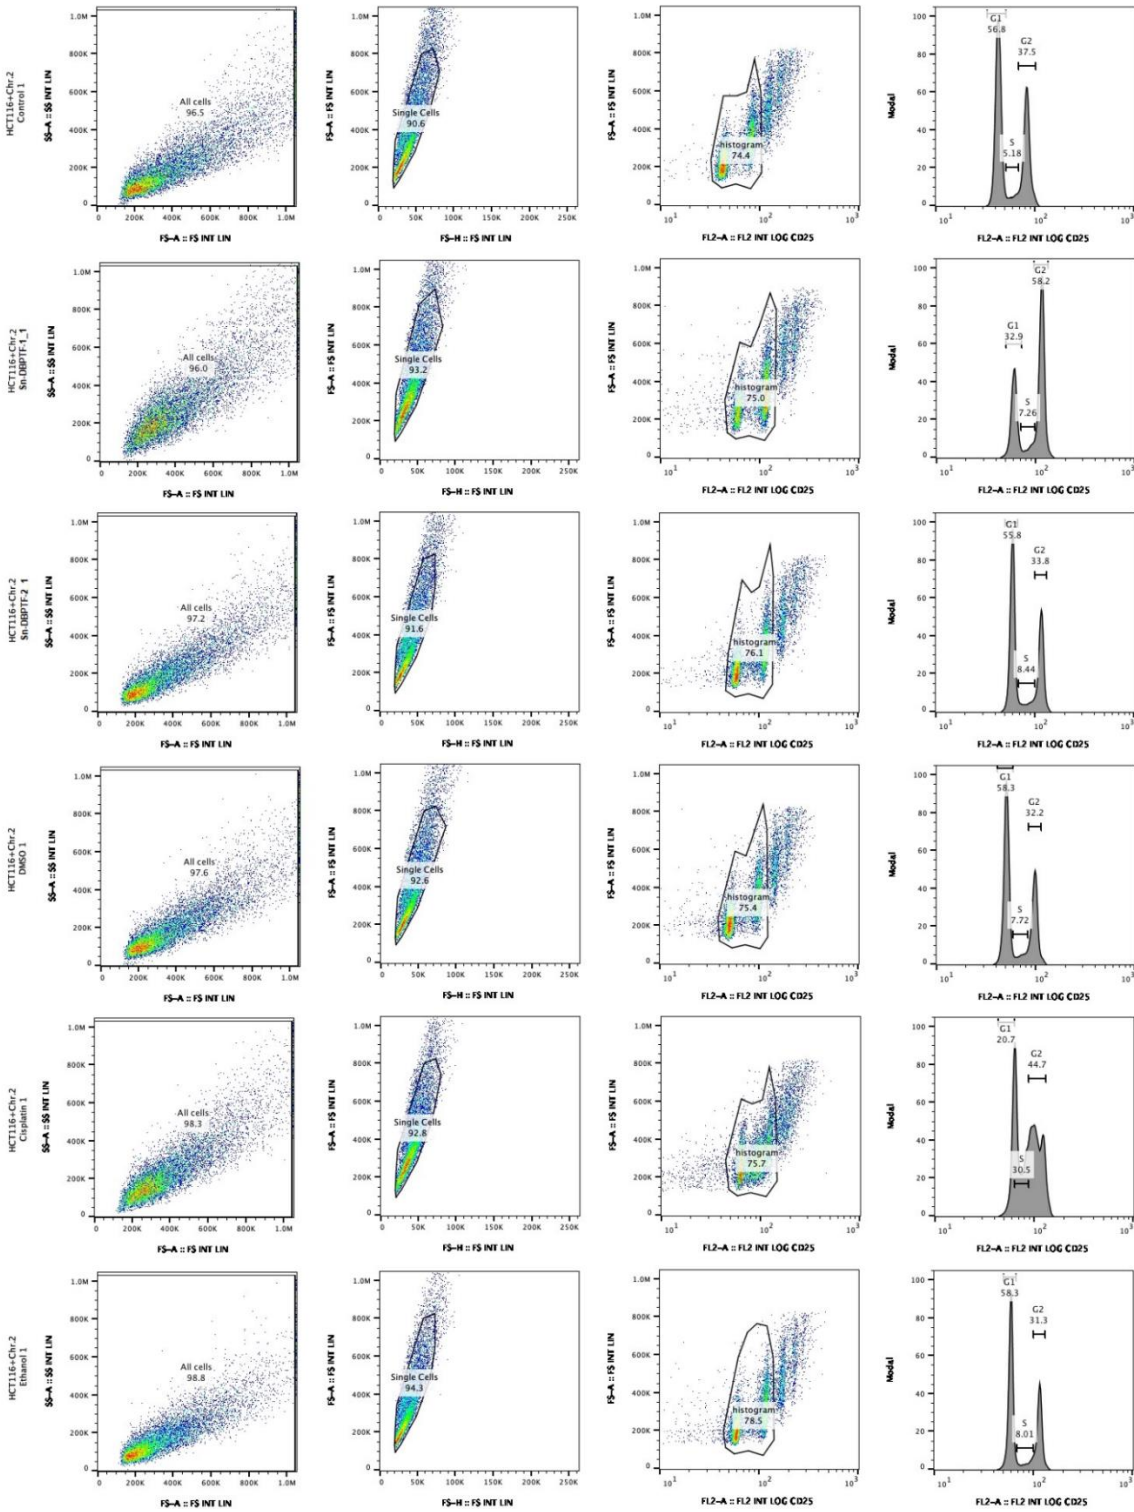

Figure S48. Step by step flow cytometry analysis of HCT116+Chr.2 cell line and corresponding treatments in FlowJo (Trial 1)

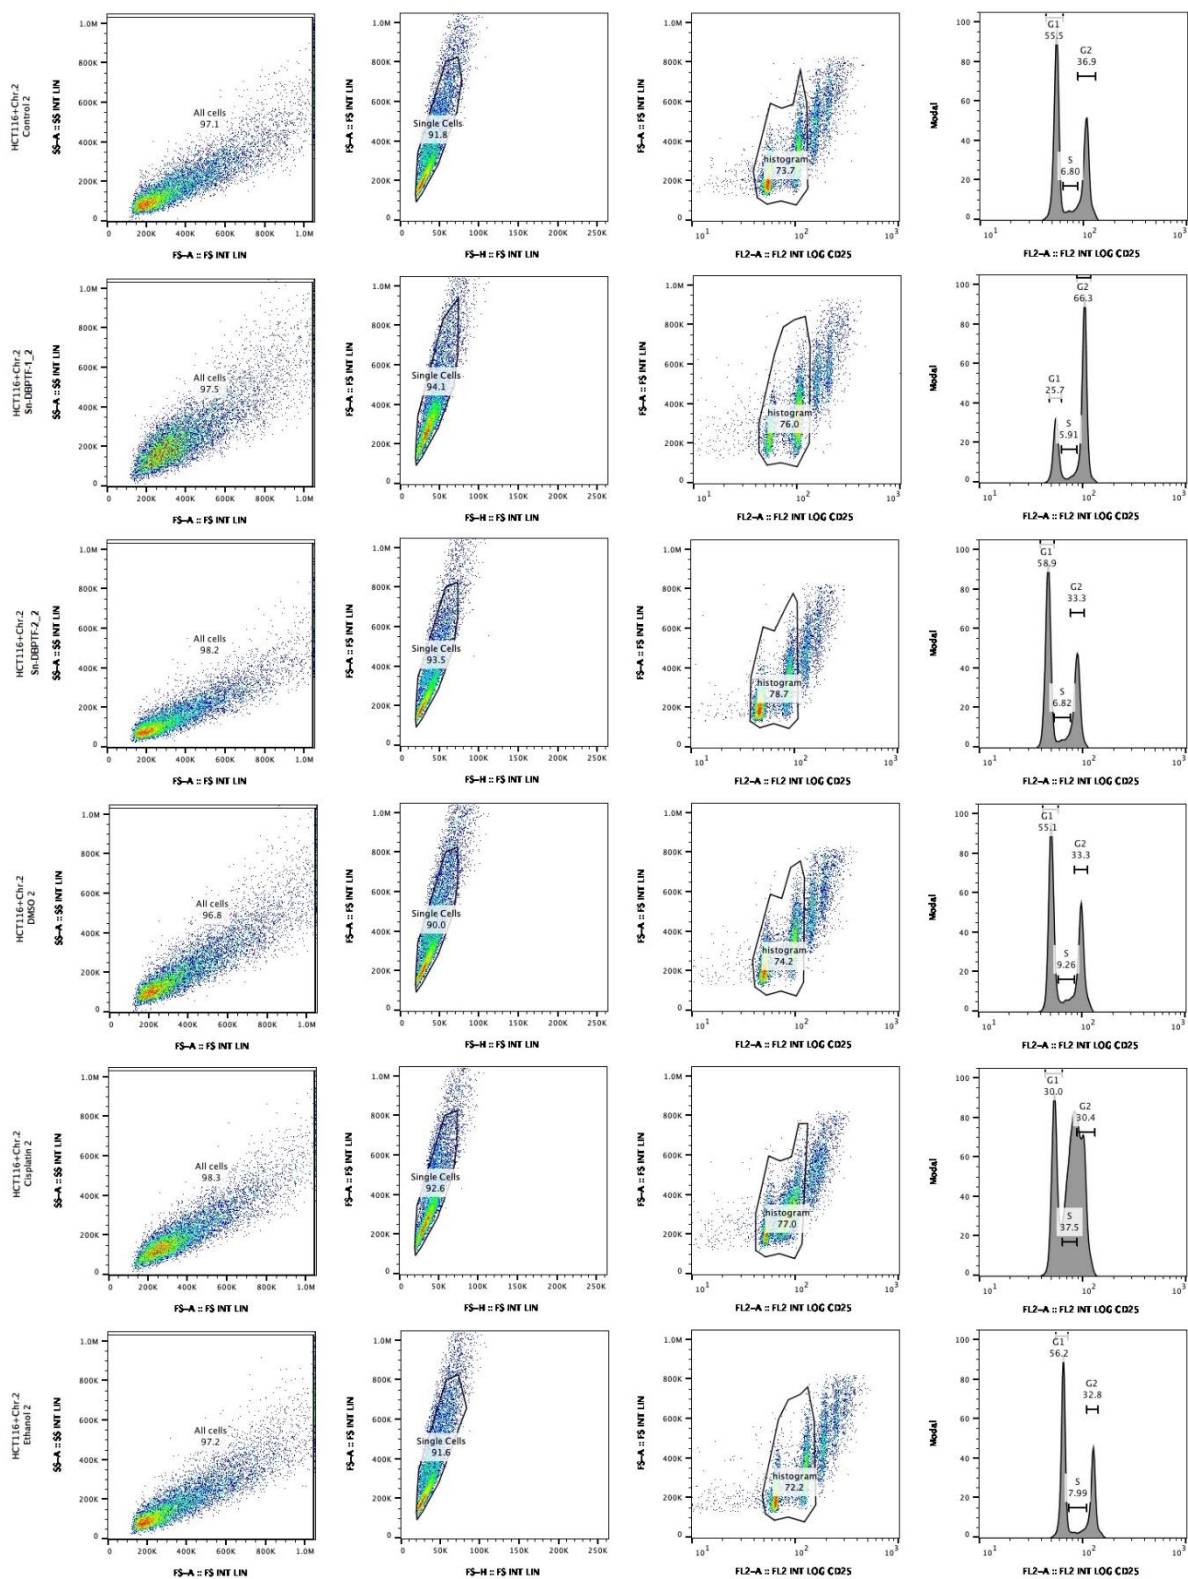

Figure S49. Step by step flow cytometry analysis of HCT116+Chr.2 cell line and corresponding treatments in FlowJo (Trial 2)

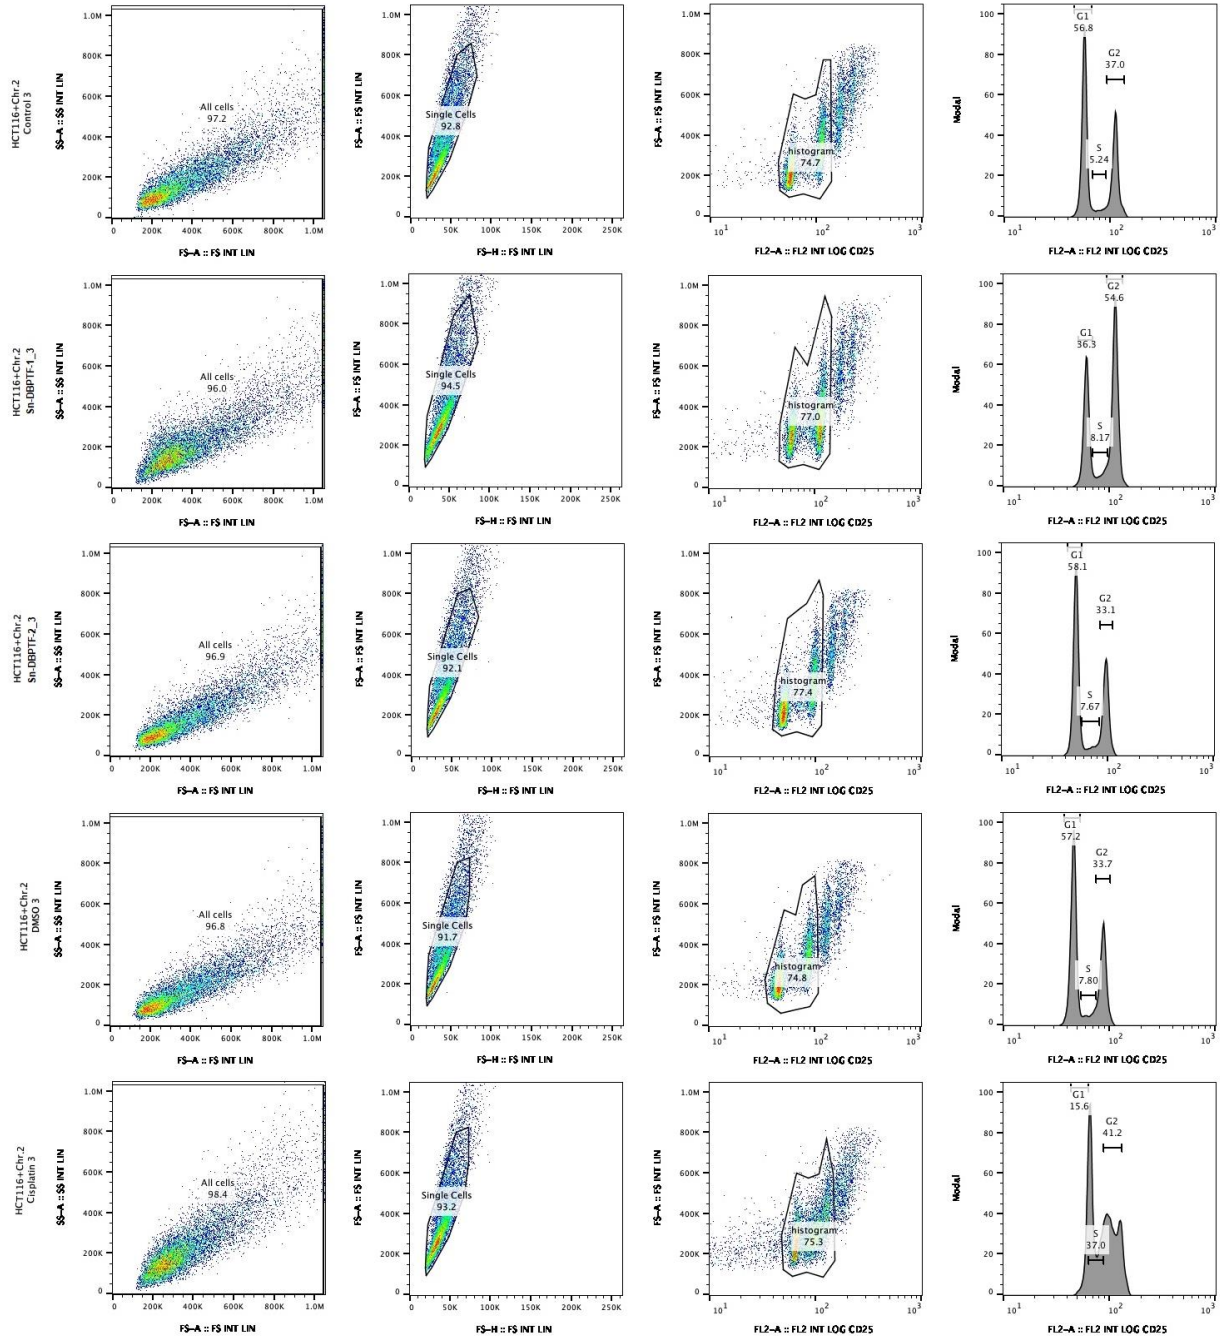

**Figure S50.** Step by step flow cytometry analysis of HCT116+Chr.2 cell line and corresponding treatments in FlowJo (Trial 3)



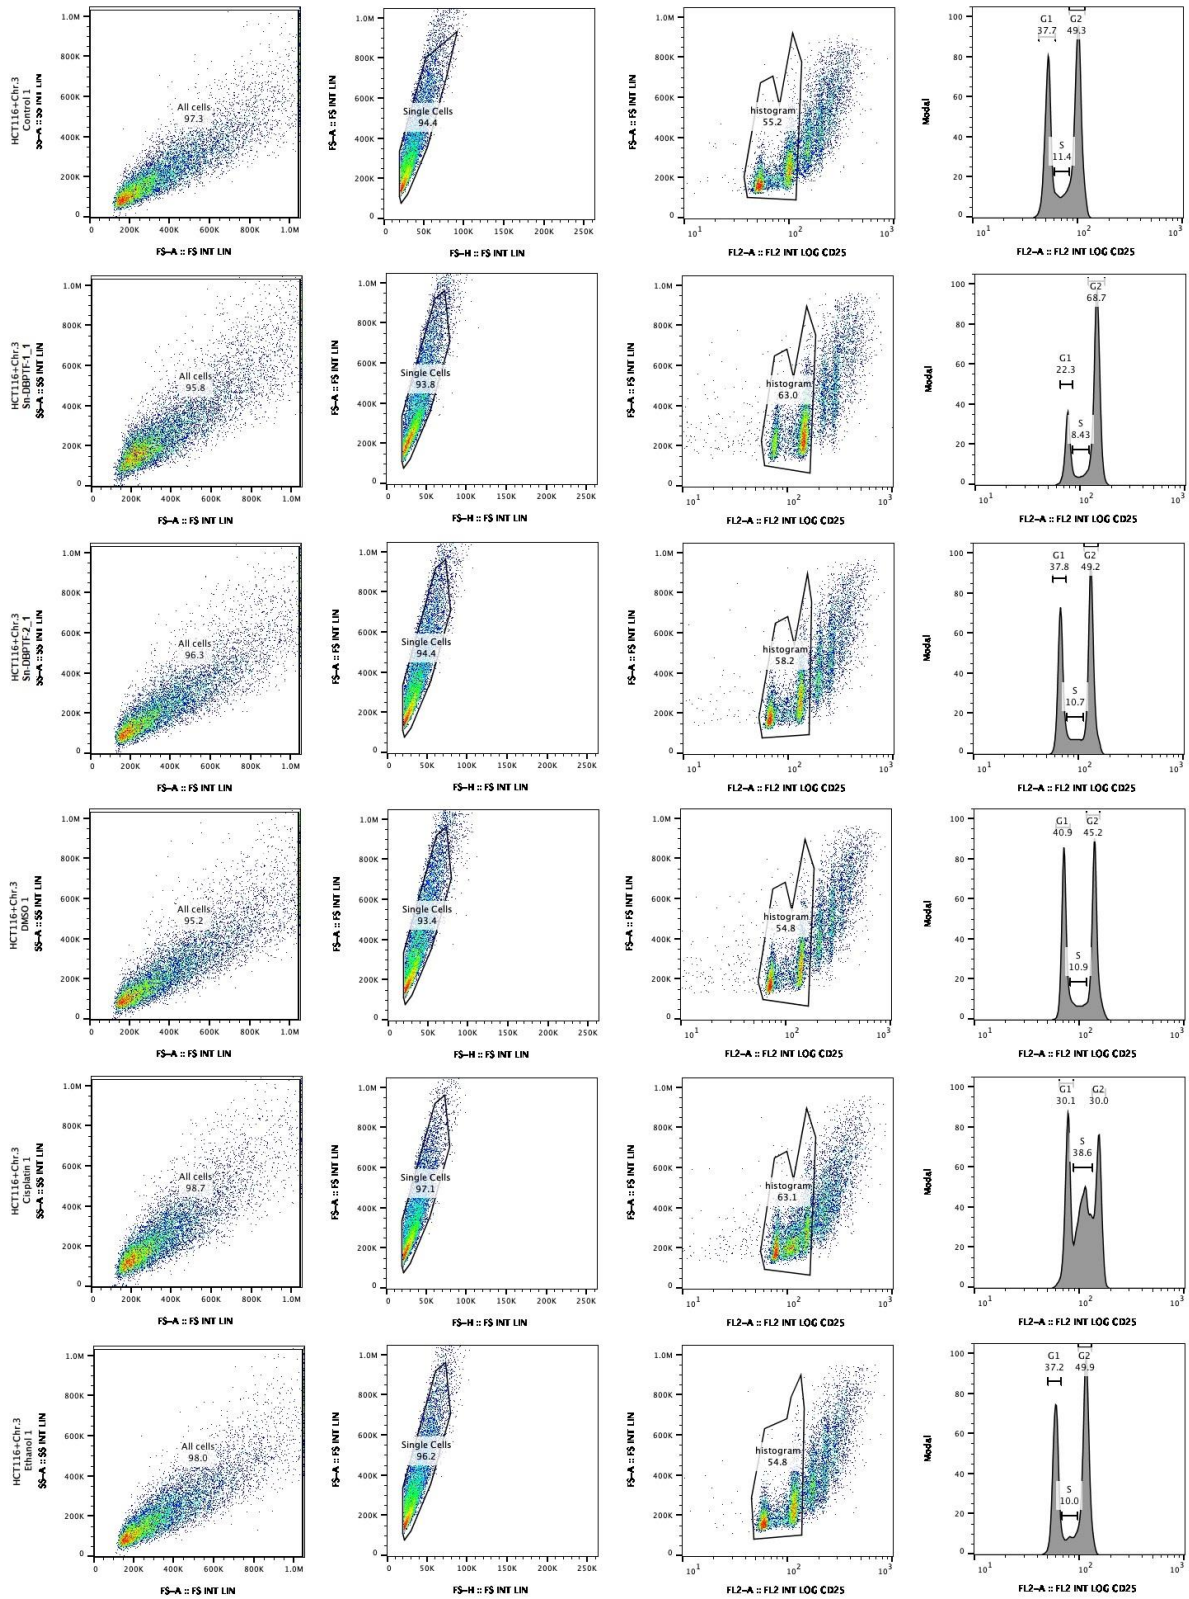

Figure S51. Step by step flow cytometry analysis of HCT116+Chr.3 cell line and corresponding treatments in FlowJo (Trial 1)



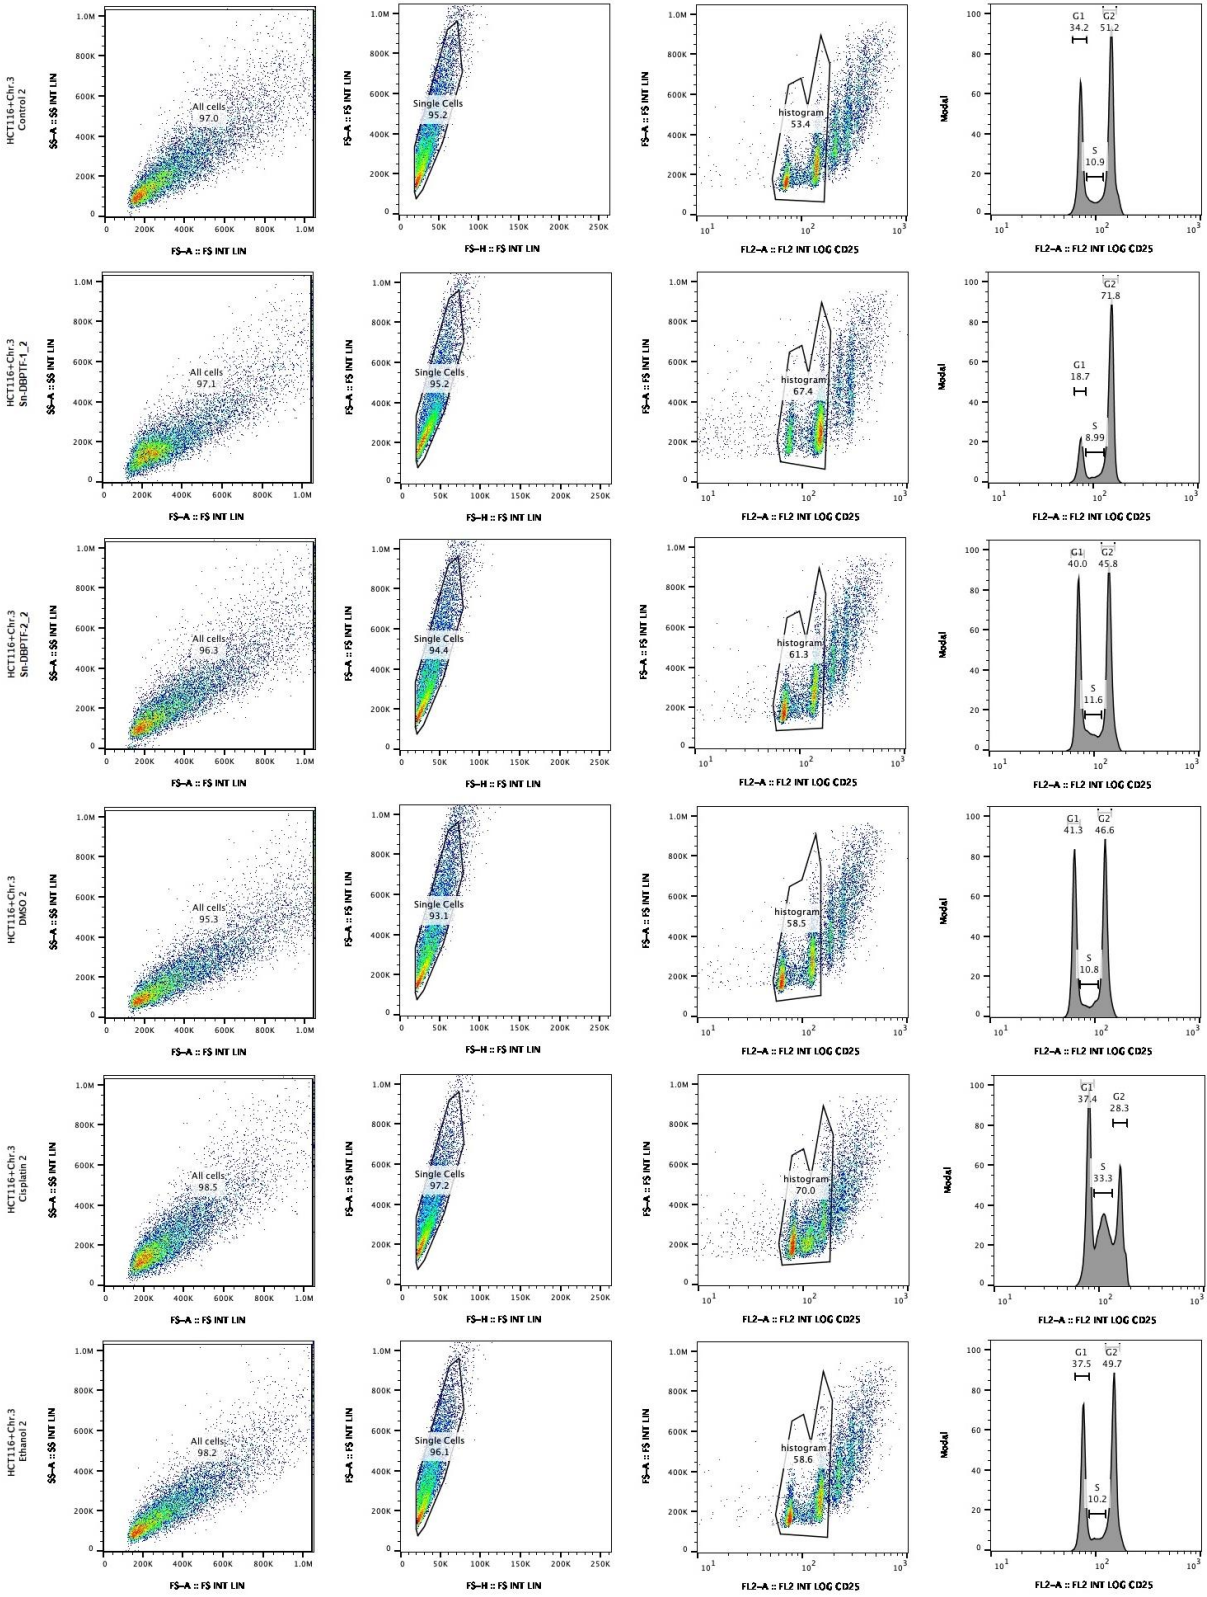

Figure S52. Step by step flow cytometry analysis of HCT116+Chr.3 cell line and corresponding treatments in FlowJo (Trial 2)

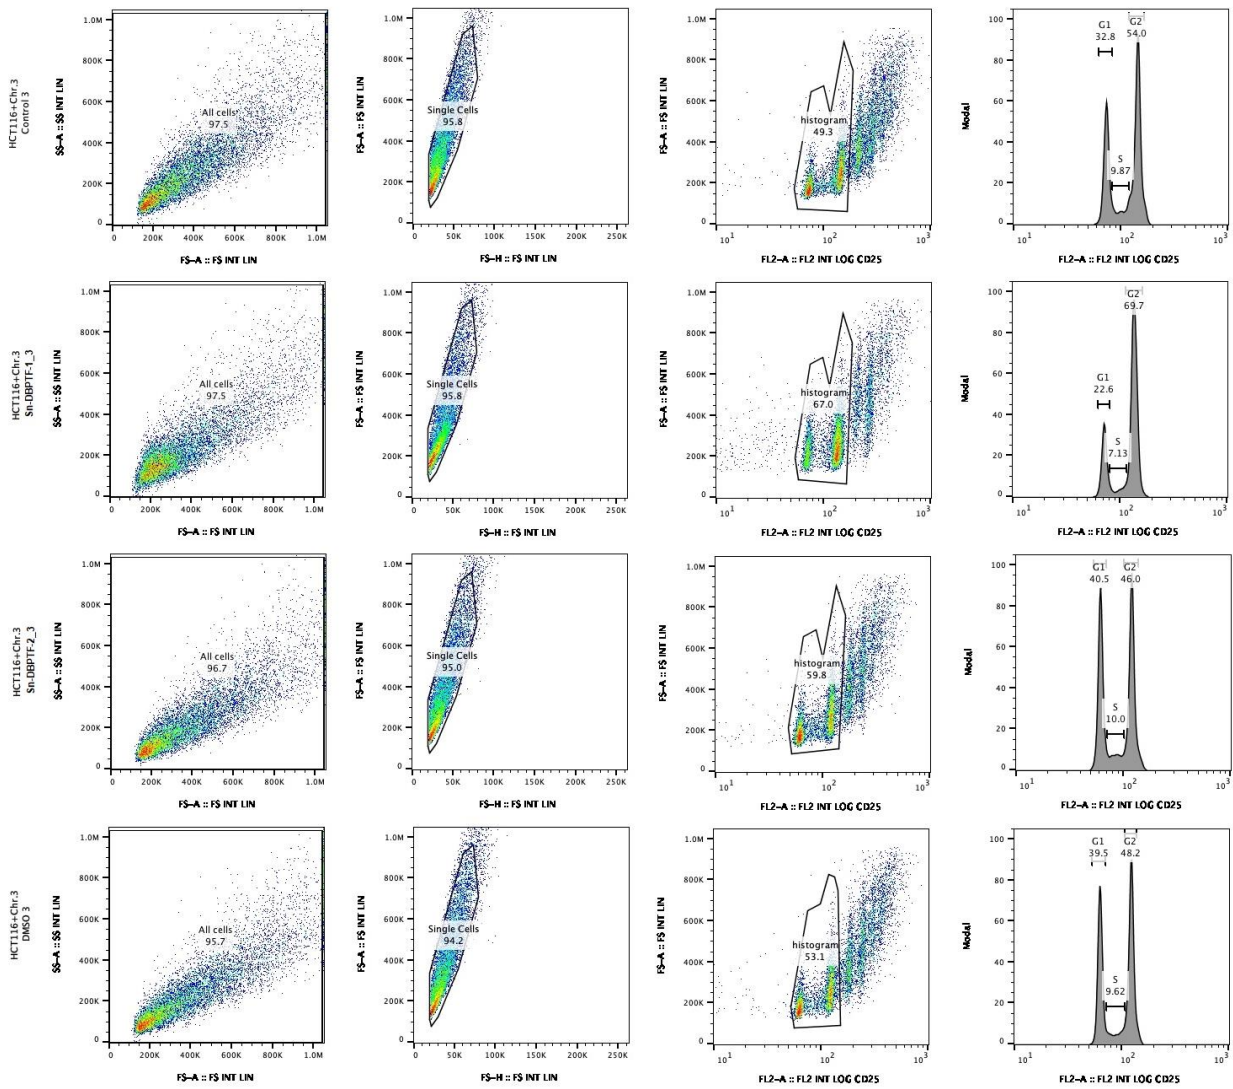

**Figure S53.** Step by step flow cytometry analysis of HCT116+Chr.3 cell line and corresponding treatments in FlowJo (Trial 3)

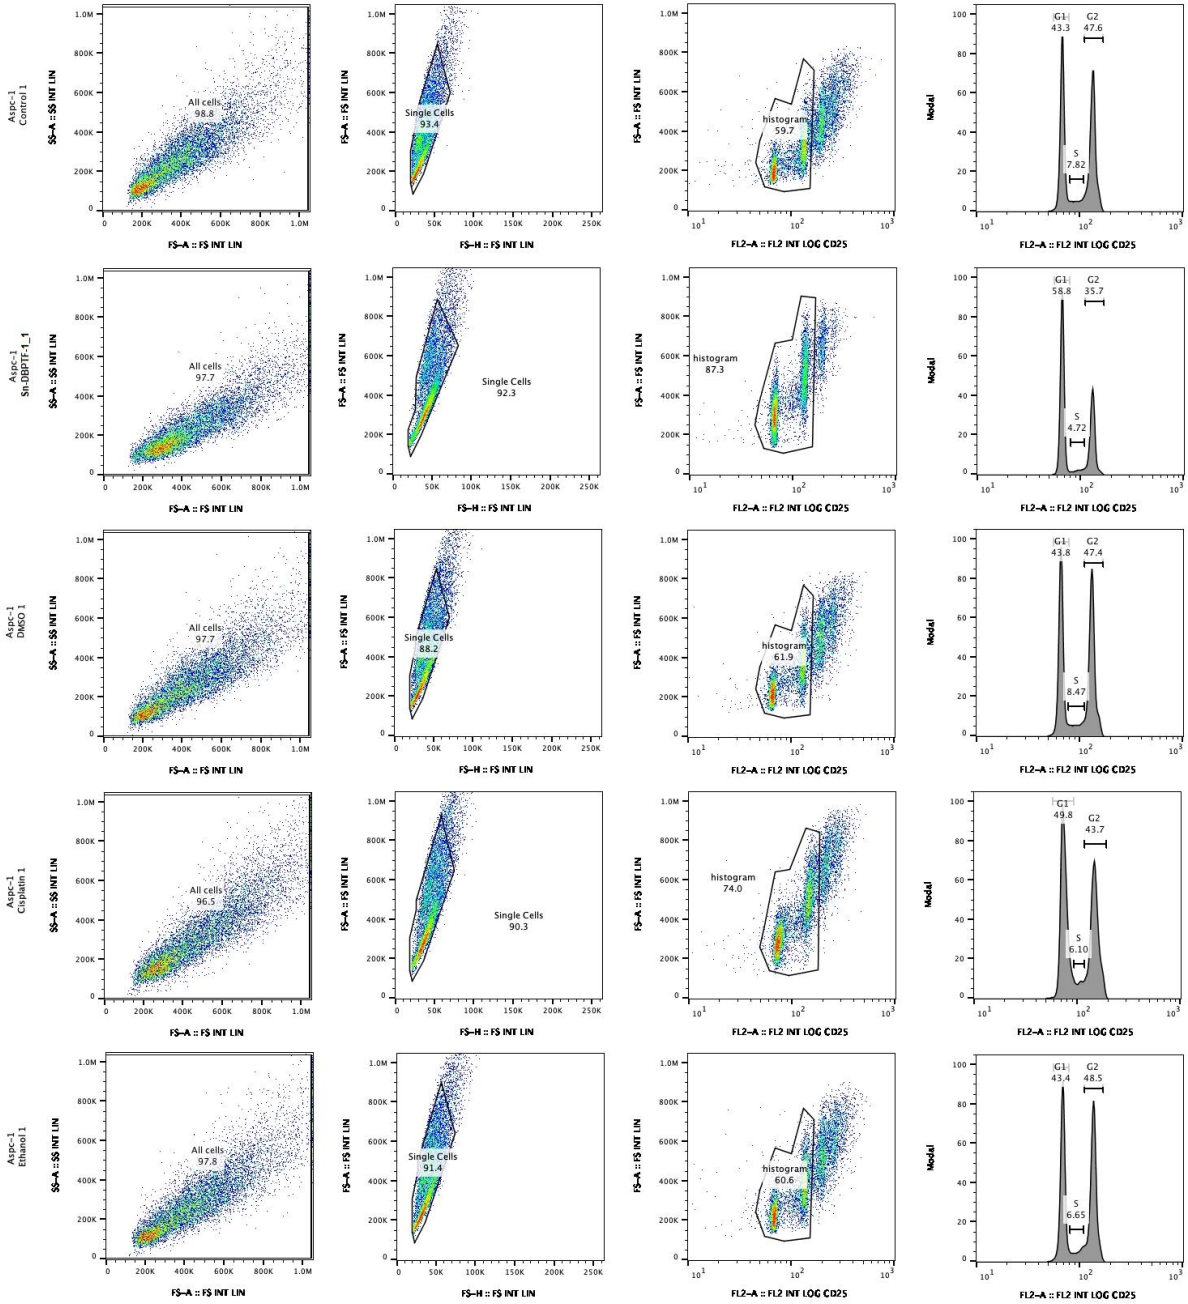

Figure S54. Step by step flow cytometry analysis of Aspc-1 cell line and corresponding treatments in FlowJo (Trial 1)

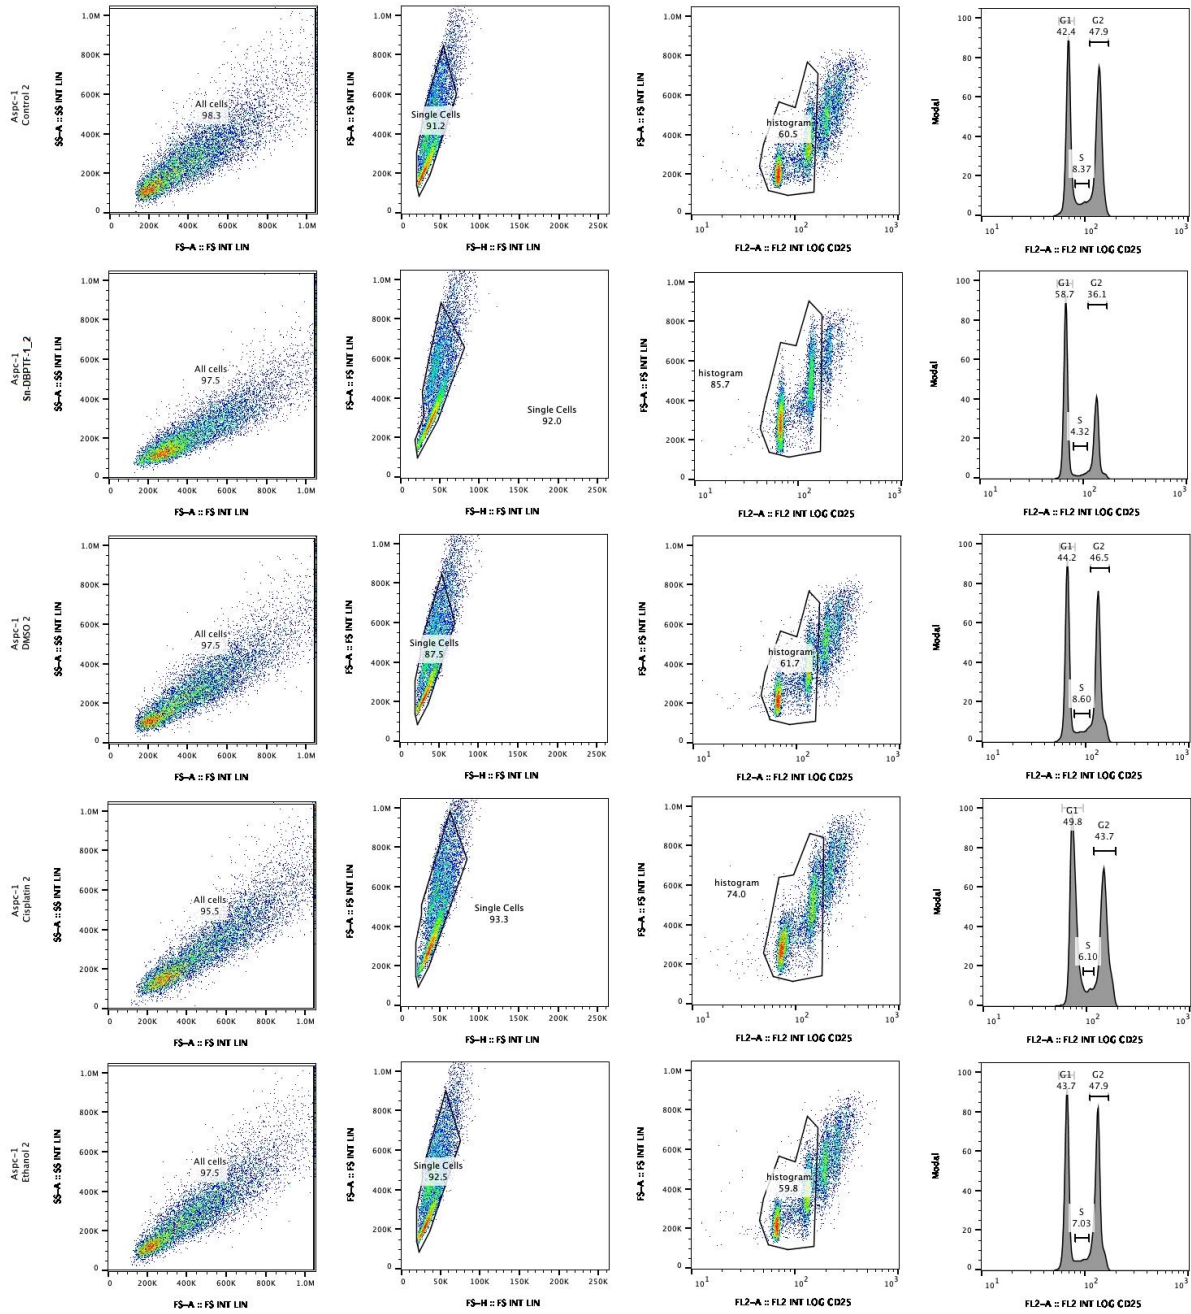

**Figure S55.** Step by step flow cytometry analysis of Aspc-1 cell line and corresponding treatments in FlowJo (Trial 2)



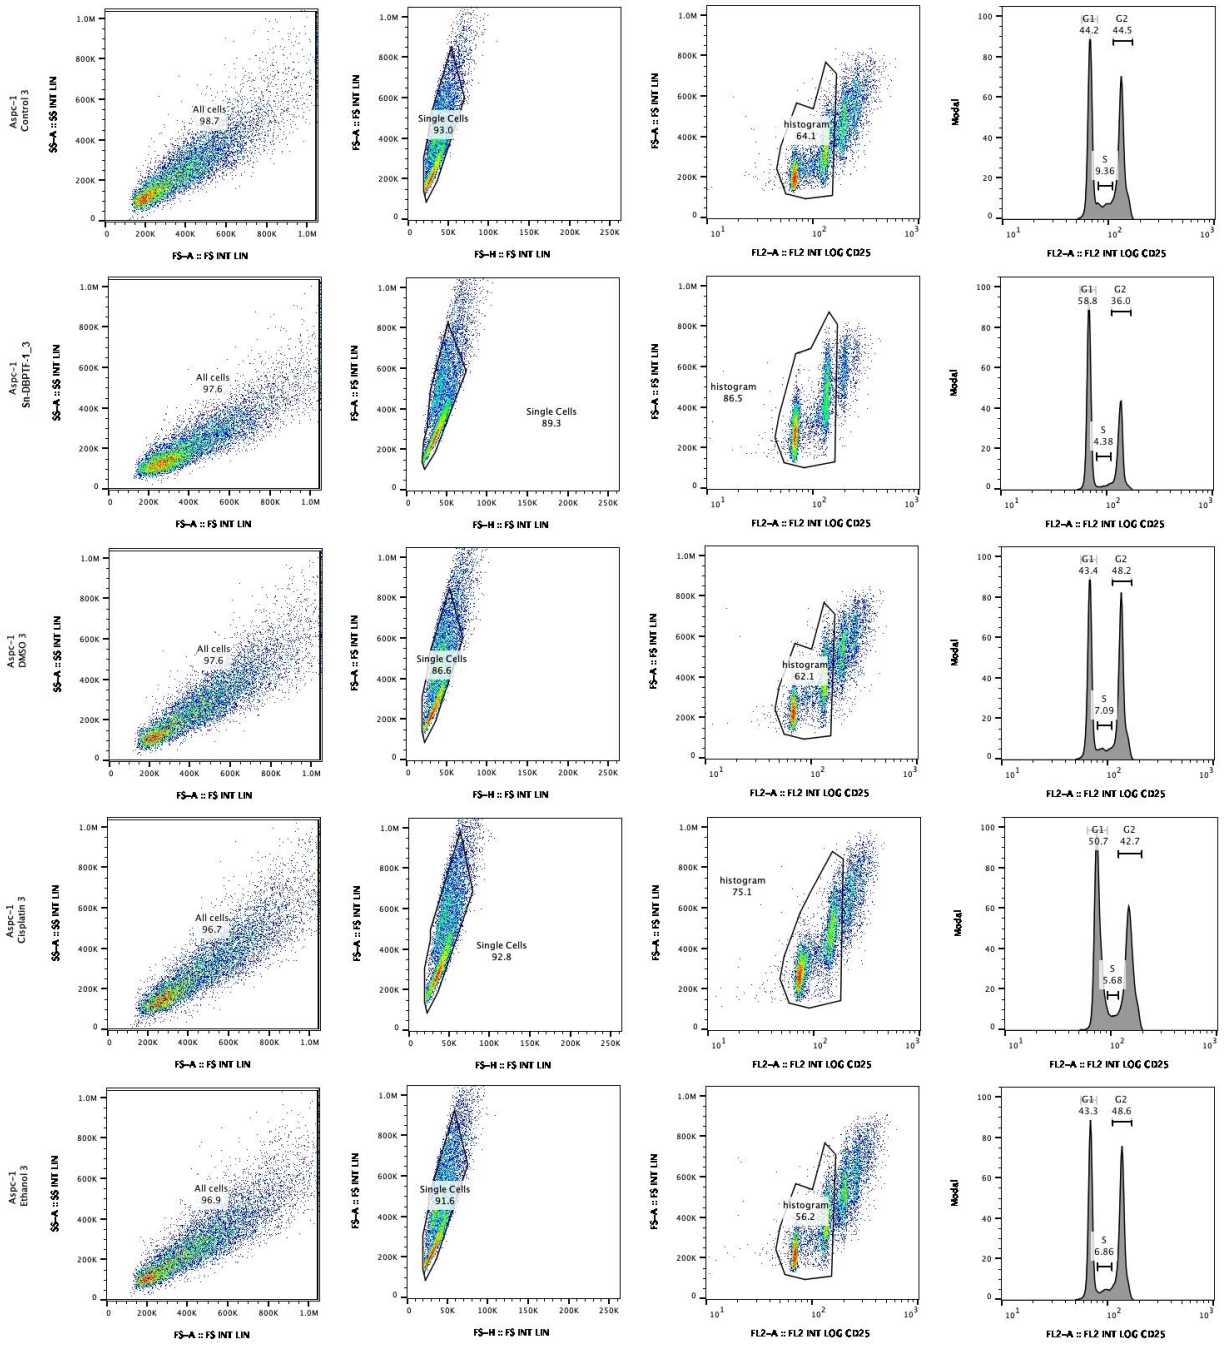

**Figure S56.** Step by step flow cytometry analysis of Aspc-1 cell line and corresponding treatments in FlowJo (Trial 3)

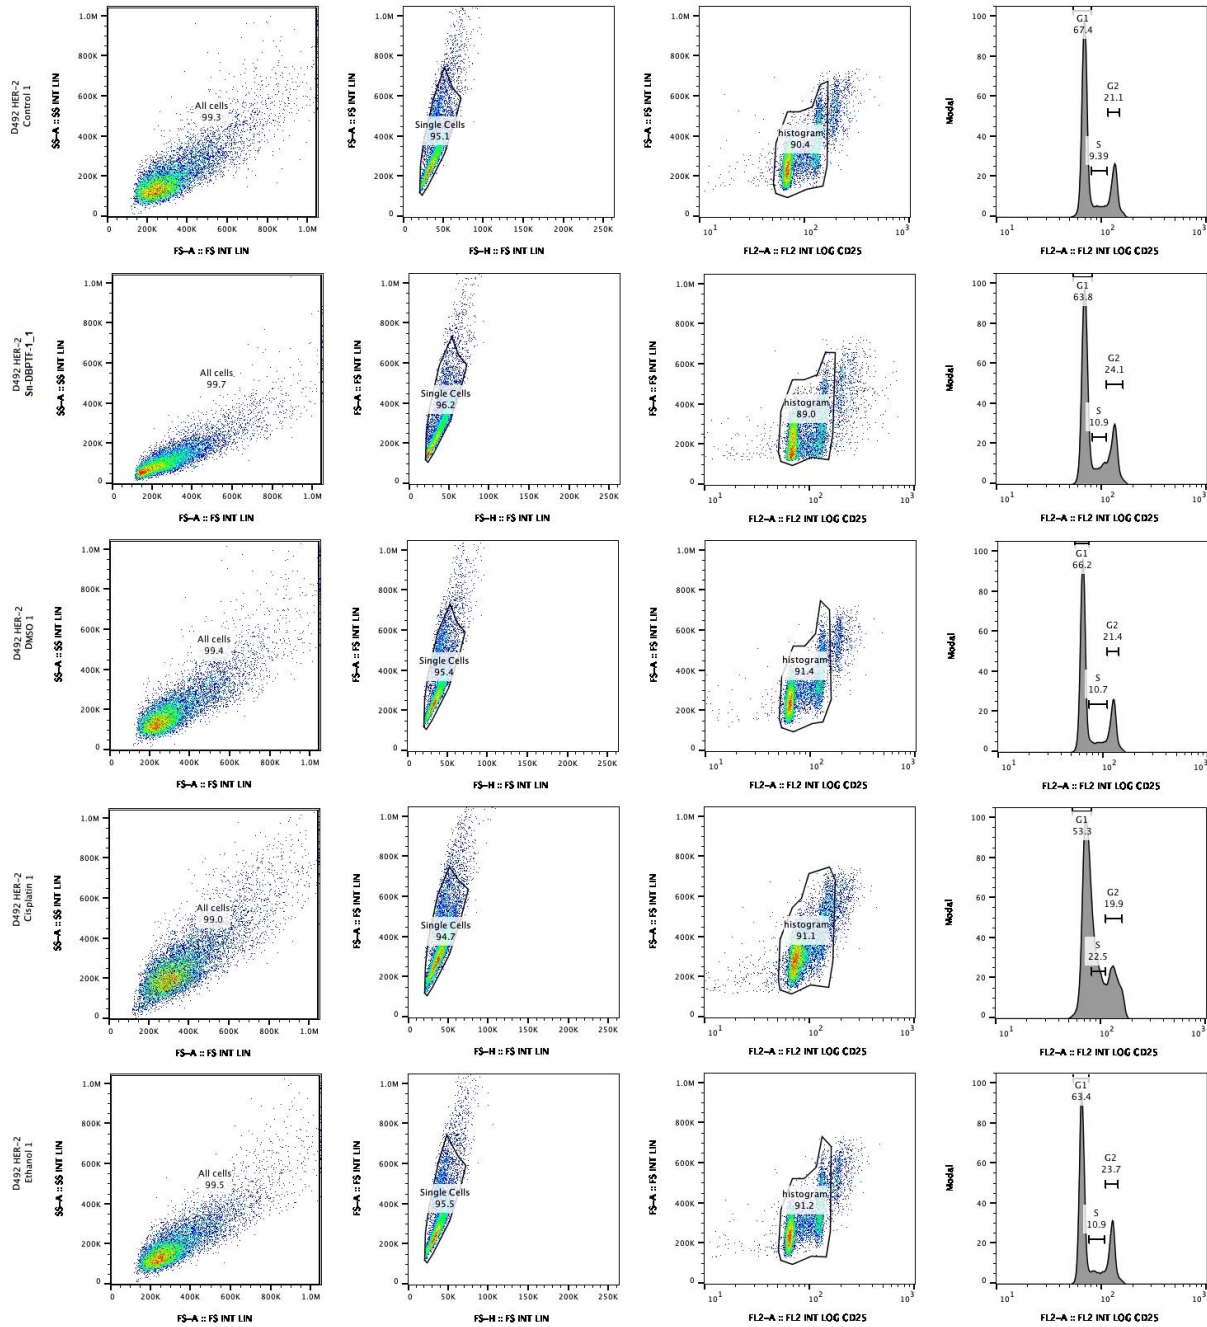

**Figure S57.** Step by step flow cytometry analysis of D492 HER-2 cell line and corresponding treatments in FlowJo (Trial 1).

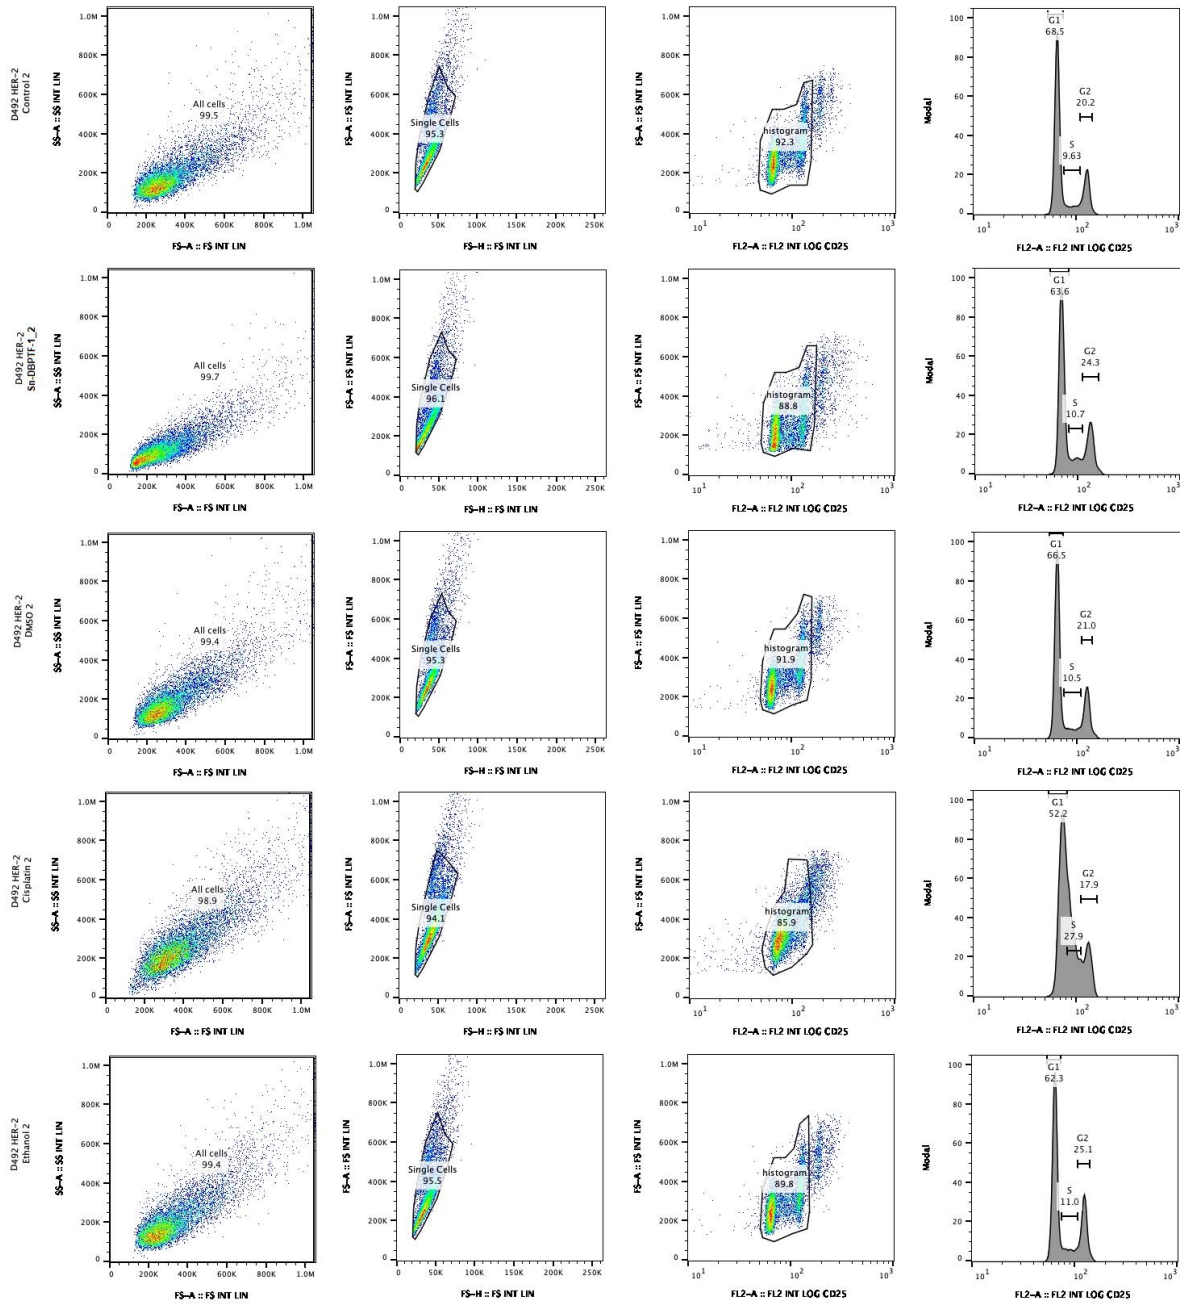

**Figure S58.** Step by step flow cytometry analysis of D492 HER-2 cell line and corresponding treatments in FlowJo (Trial 2).

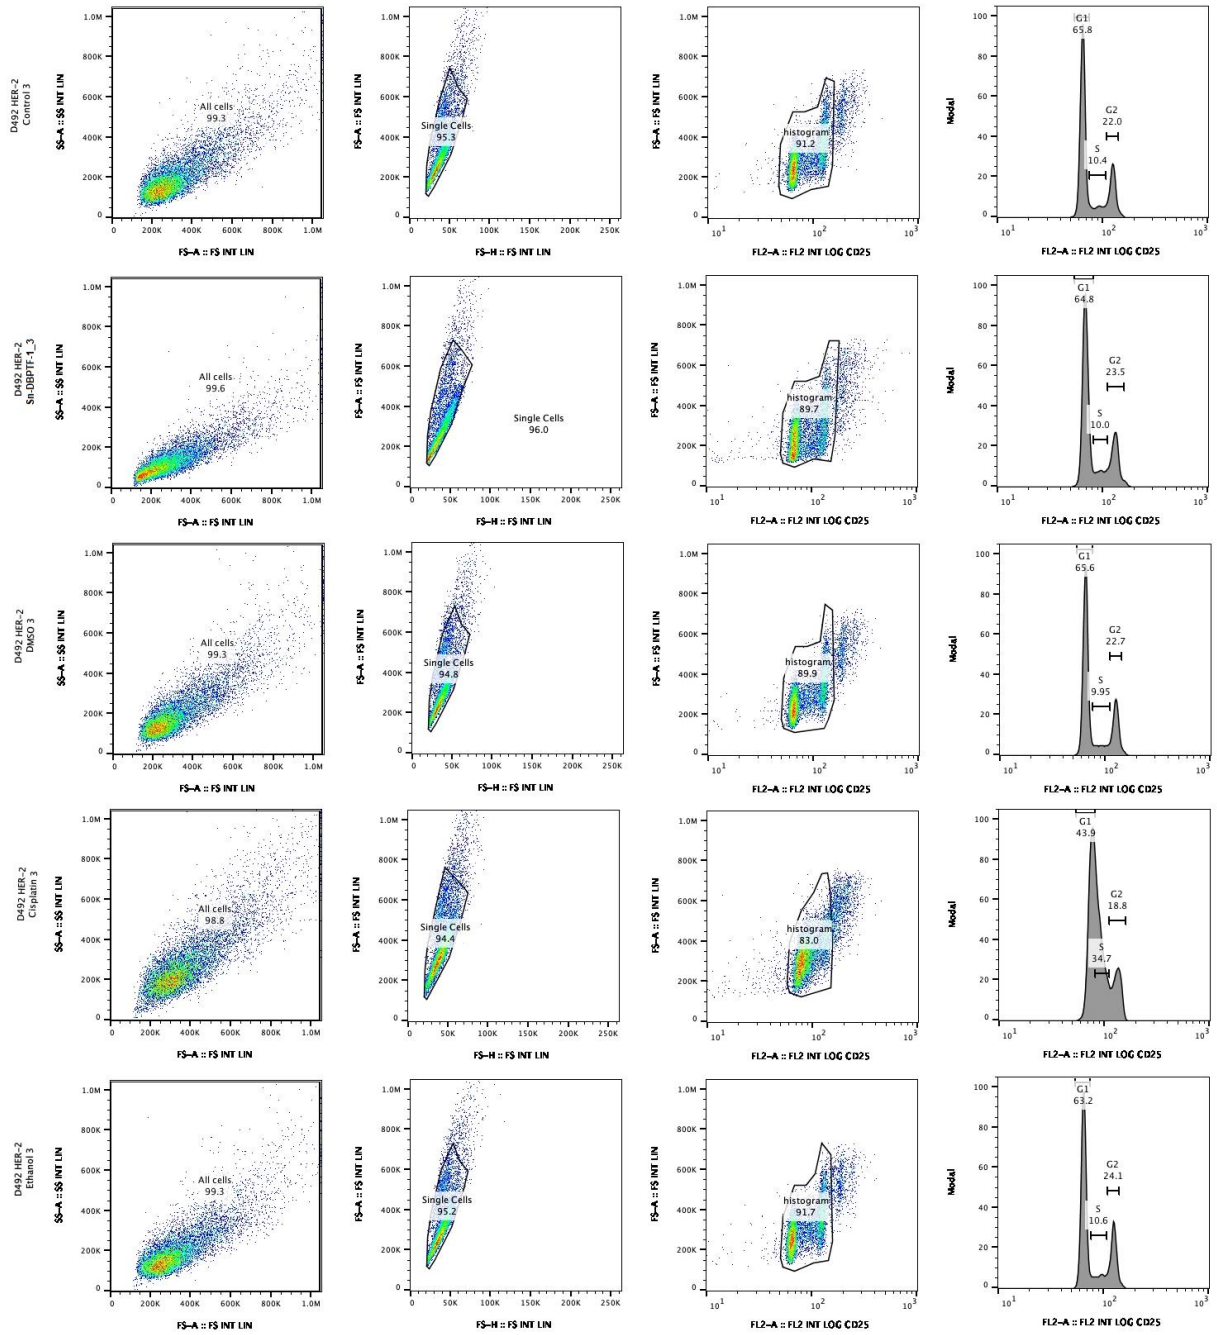

Figure S59. Step by step flow cytometry analysis of D492 HER-2 cell line and corresponding treatments in FlowJo (Trial 3).



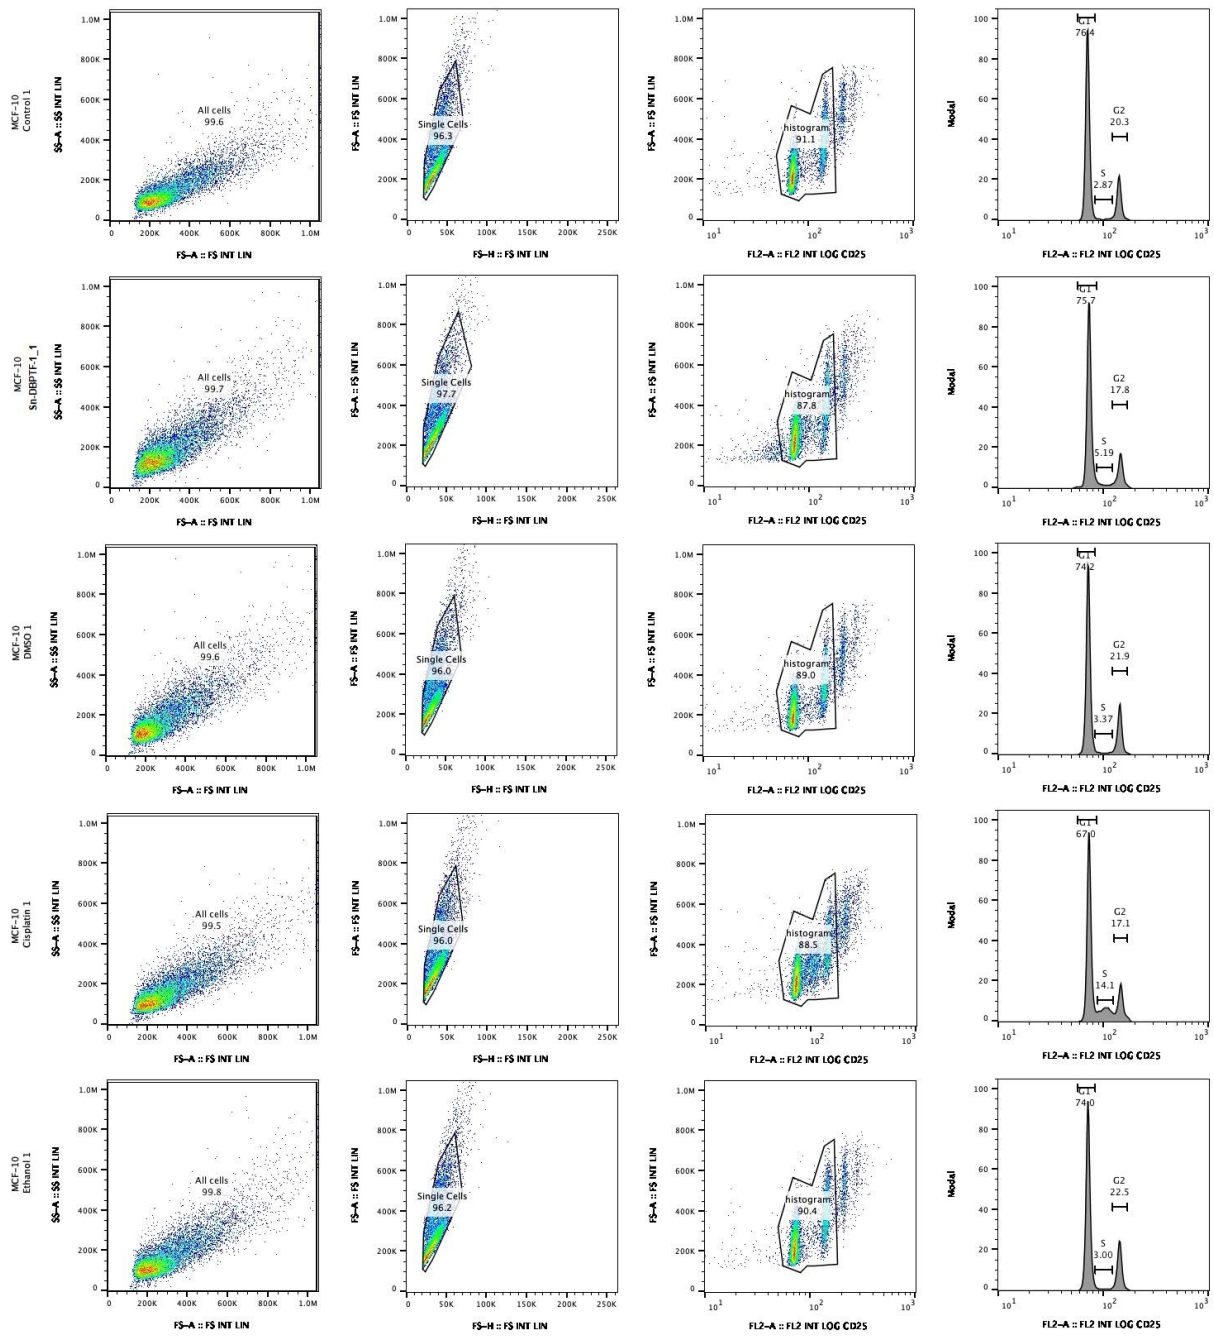

**Figure S60.** Step by step flow cytometry analysis of MCF-10 cell line and corresponding treatments in FlowJo (Trial 1).

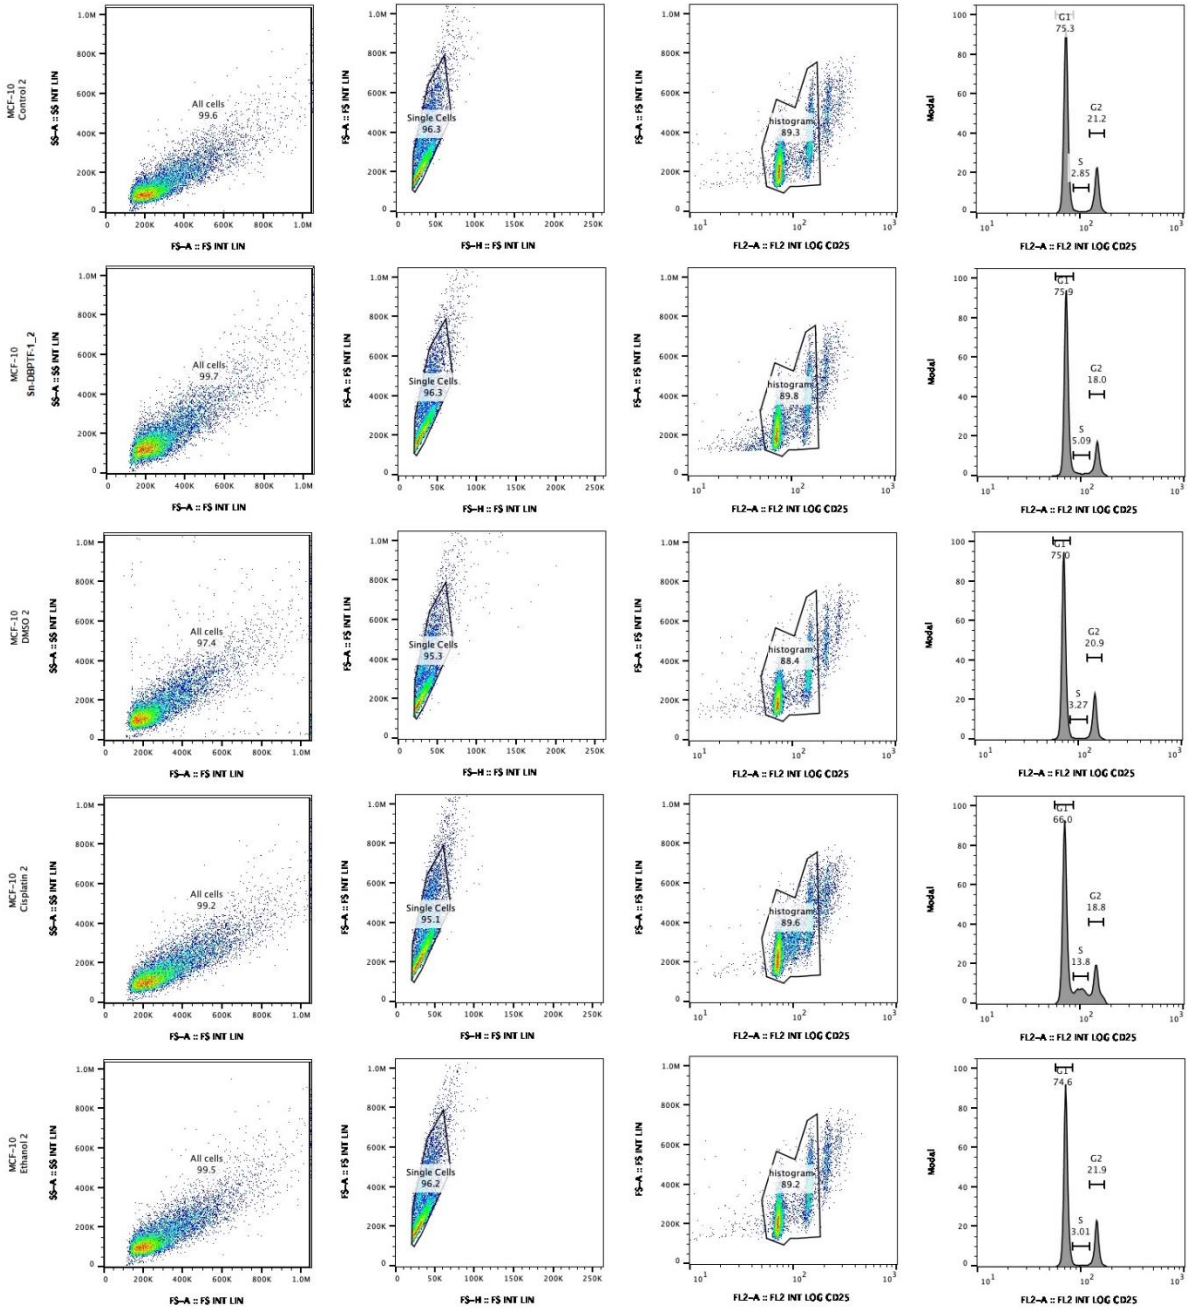

**Figure S61.** Step by step flow cytometry analysis of MCF-10 cell line and corresponding treatments in FlowJo (Trial 2).

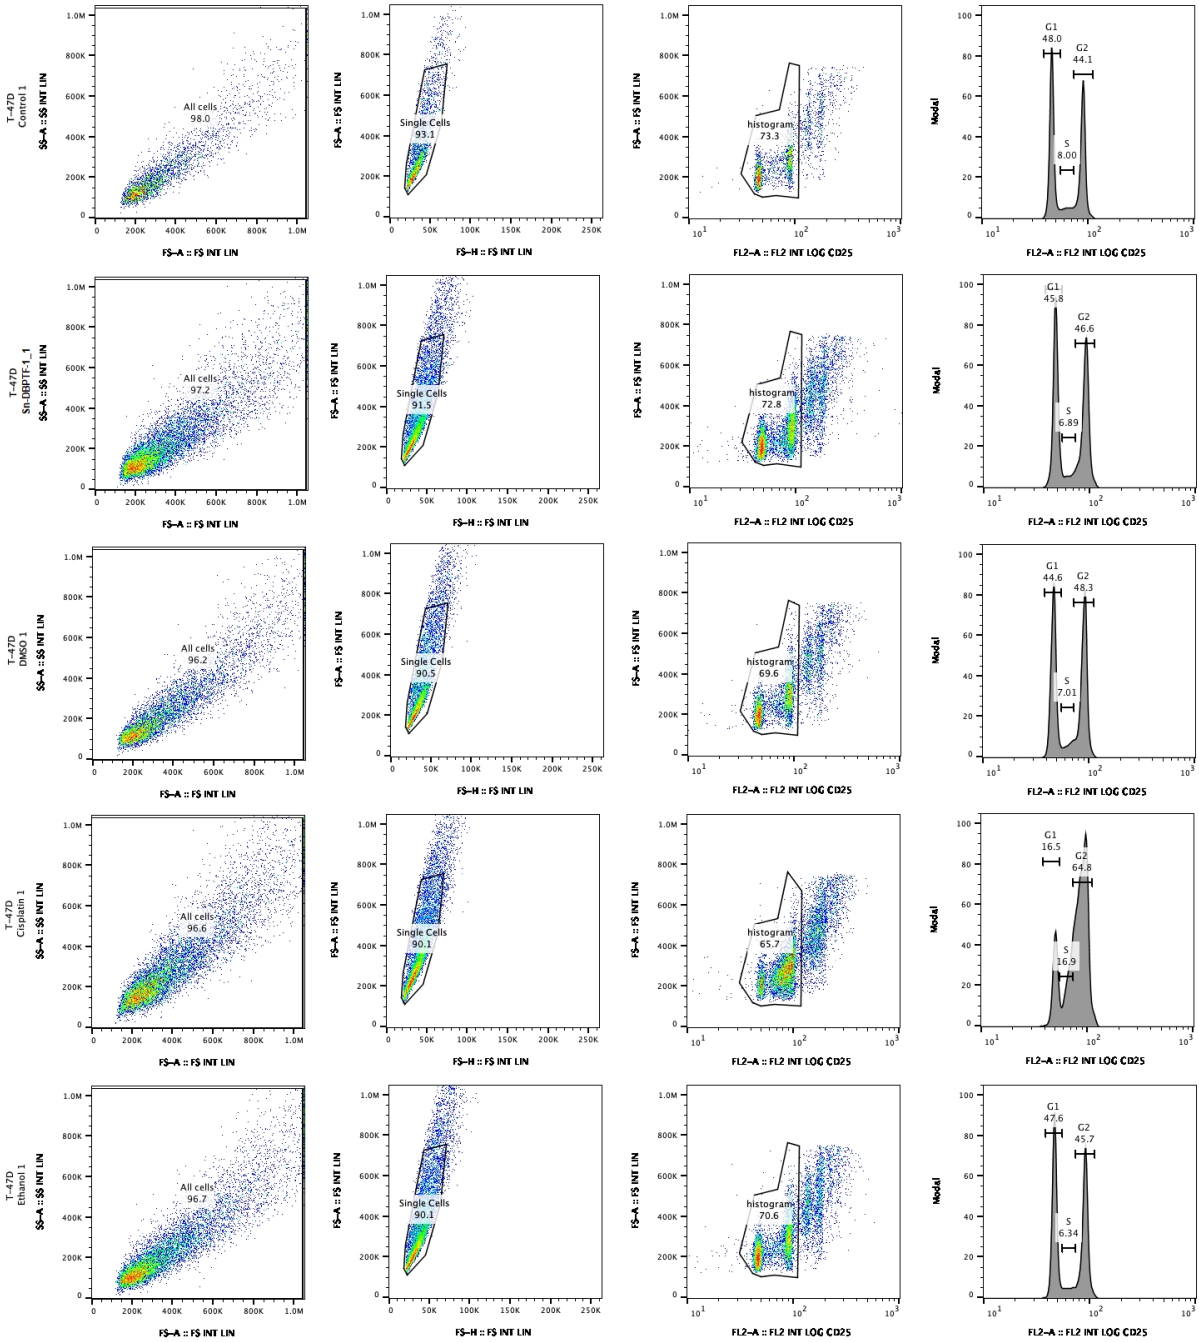

Figure S62. Step by step flow cytometry analysis of T-47D cell line and corresponding treatments in FlowJo (Trial 1).

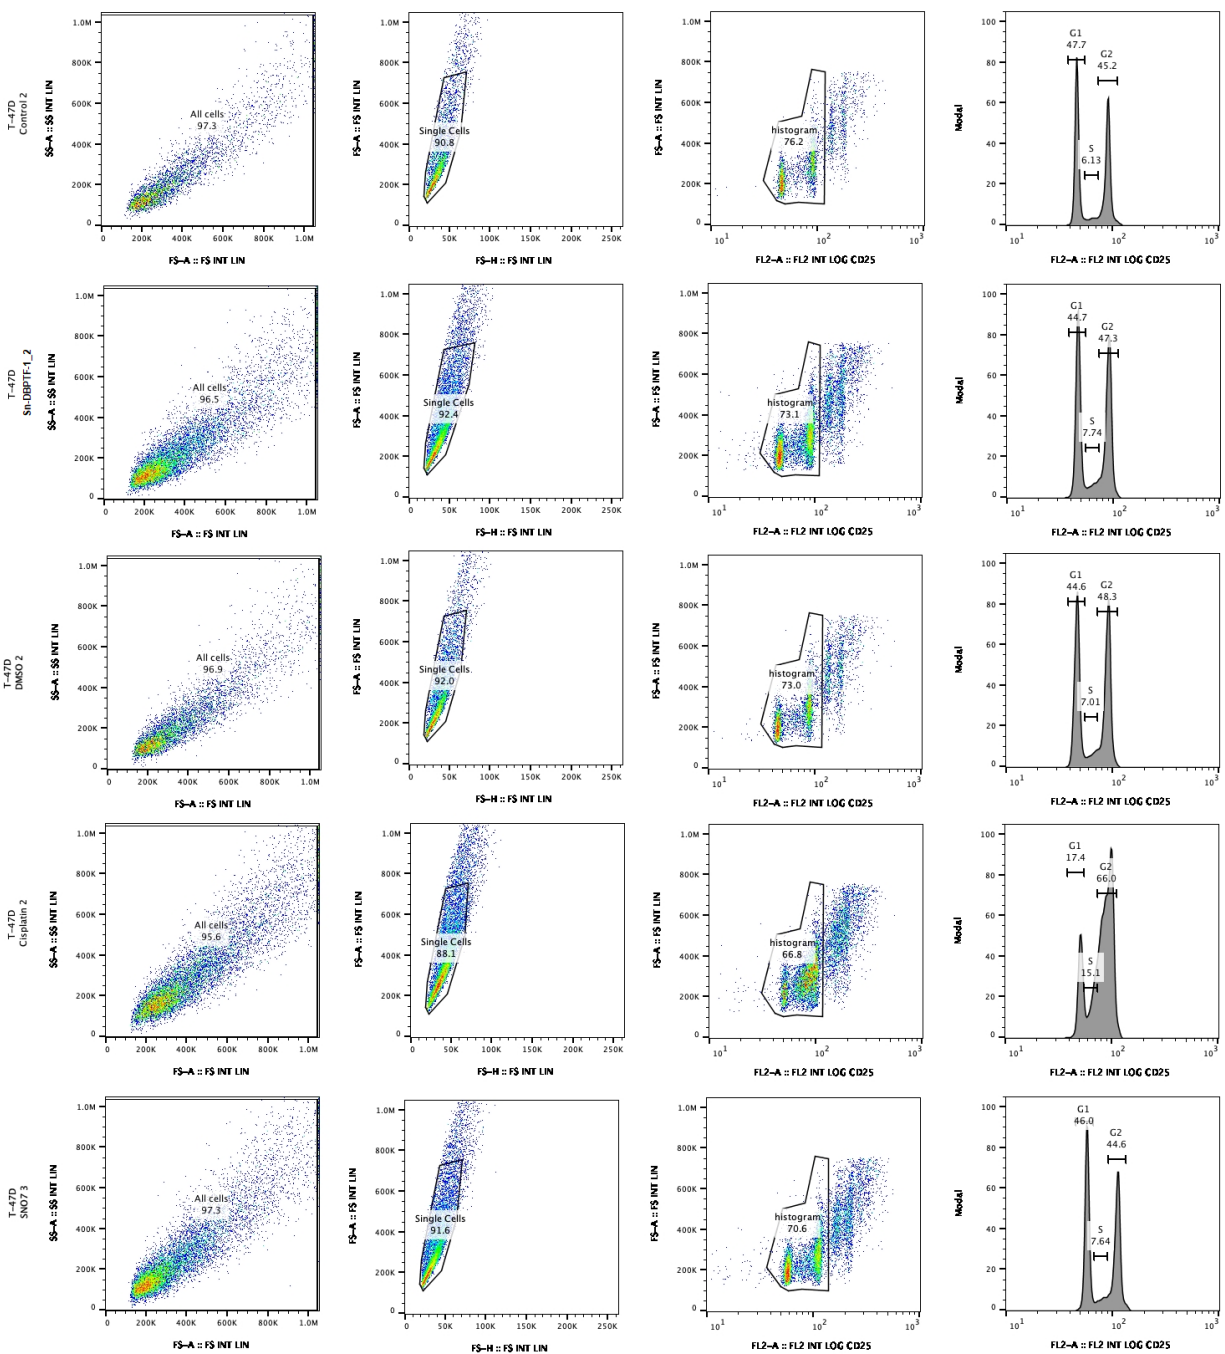

Figure S63. Step by step flow cytometry analysis of T-47D cell line and corresponding treatments in FlowJo (Trial 2).

Reference:

1. S. N. Ólafsson, R. Bjornsson, Ö. Helgason, S. Jonsdottir and S. G. Suman, *Journal of Organometallic Chemistry*, 2016, **825-826**, 125-138.
